# Supplementary material for: Microwave assisted one-pot access to pyrazolo quinolinone and tetrahydroisoxazolo quinolinone derivatives via T3P®-DMSO catalysed tandem oxidative–condensation reaction
Source: Royal Society of Chemistry journal article supplement (doi:10.1039/d3ra05235d), 2023-01-01
Supplement: d3ra05235d1.pdf [file d3ra05235d1.pdf]

$^1\text{H}$  NMR of **2a** in  $\text{CDCl}_3$

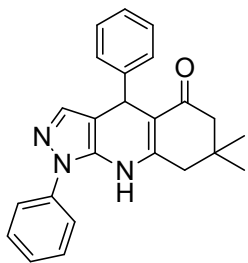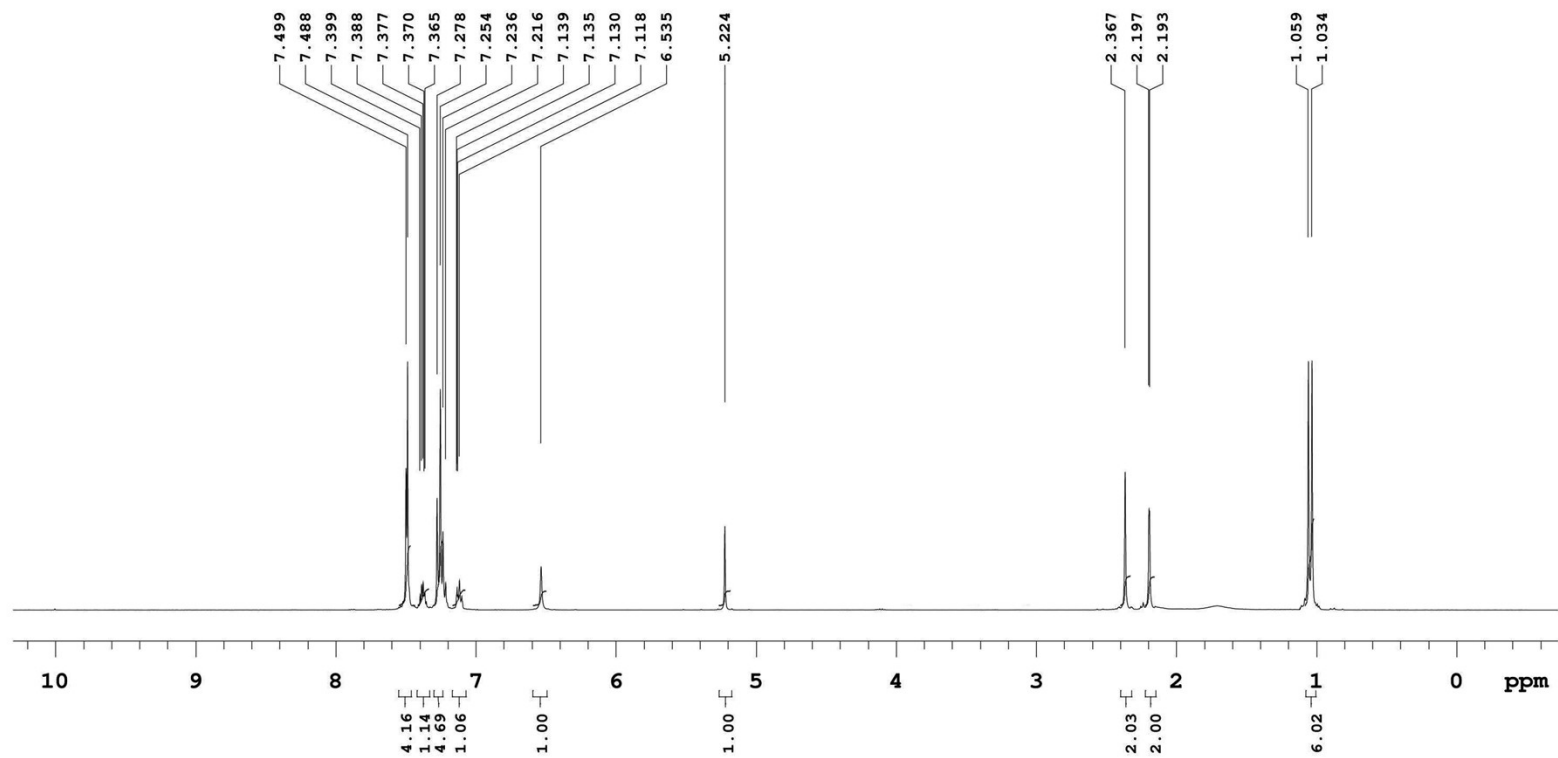

$^{13}\text{C}$  NMR of **2a** in  $\text{CDCl}_3$

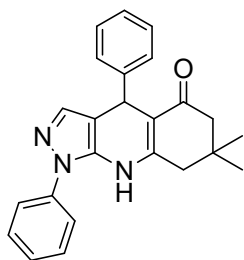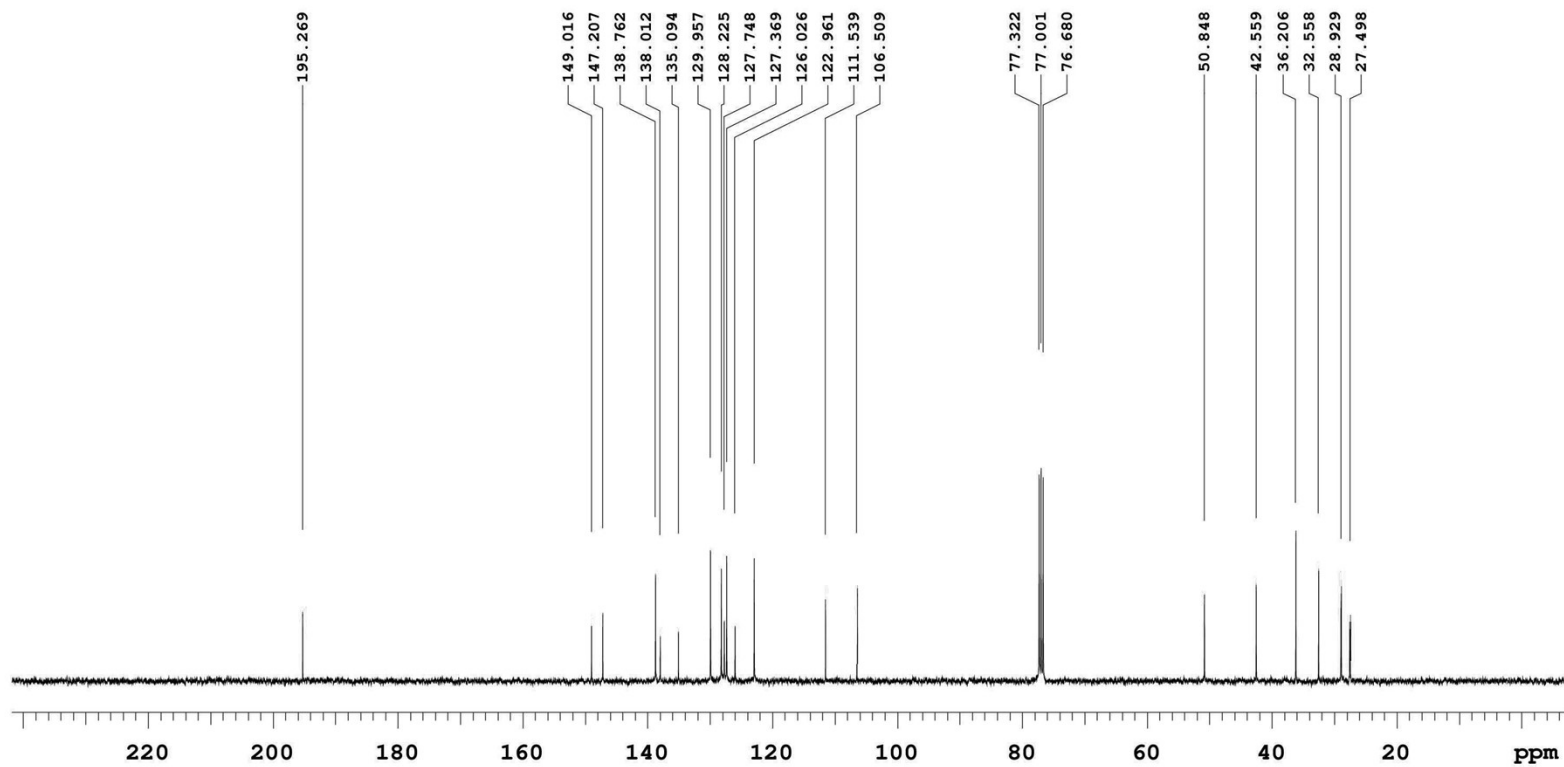

<sup>1</sup>H NMR of **2b** in CDCl<sub>3</sub>

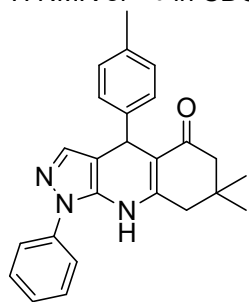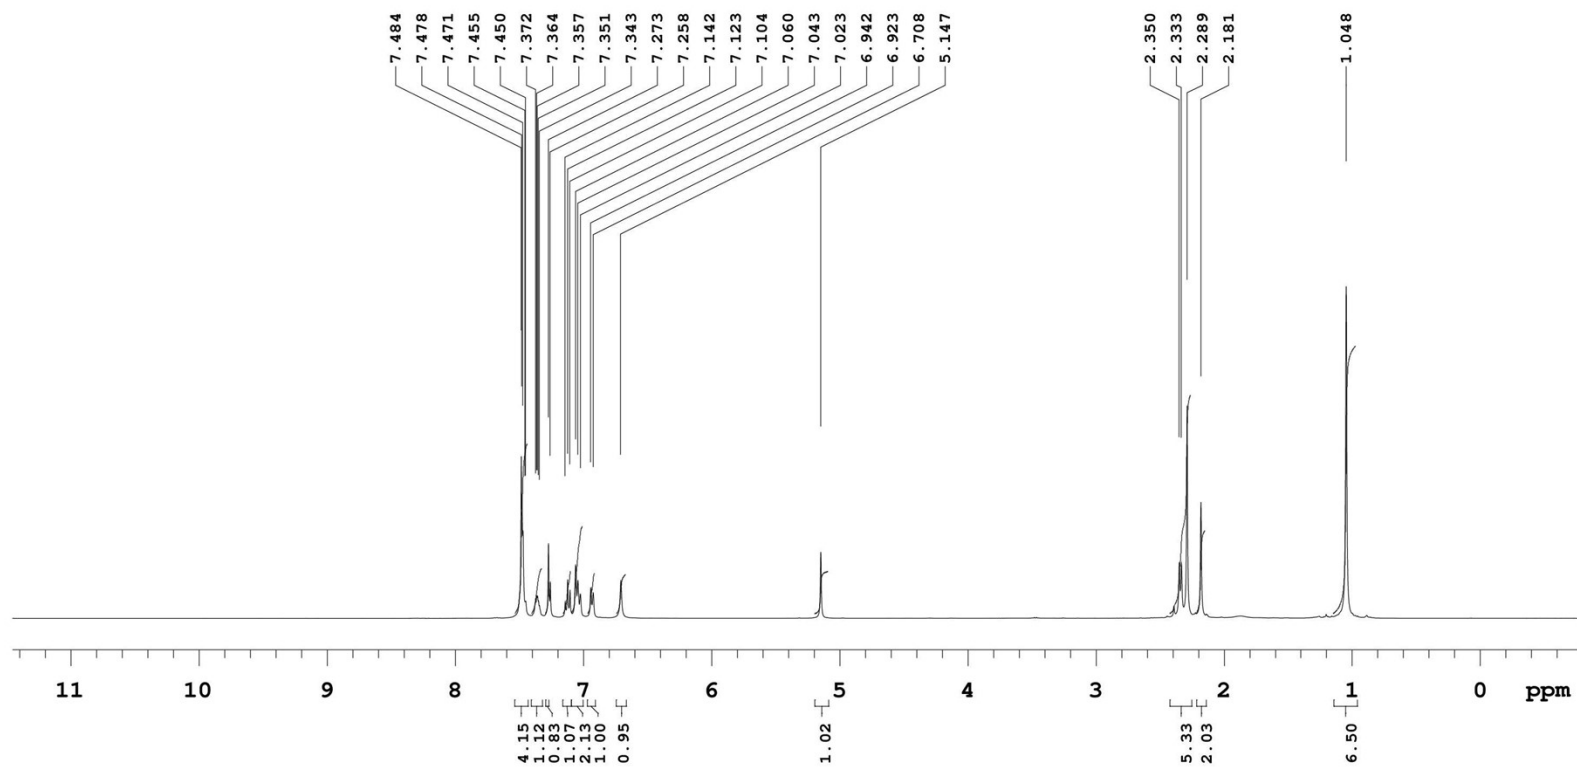

$^{13}\text{C}$  NMR of **2b** in  $\text{CDCl}_3$

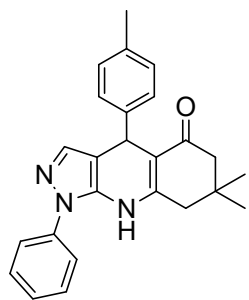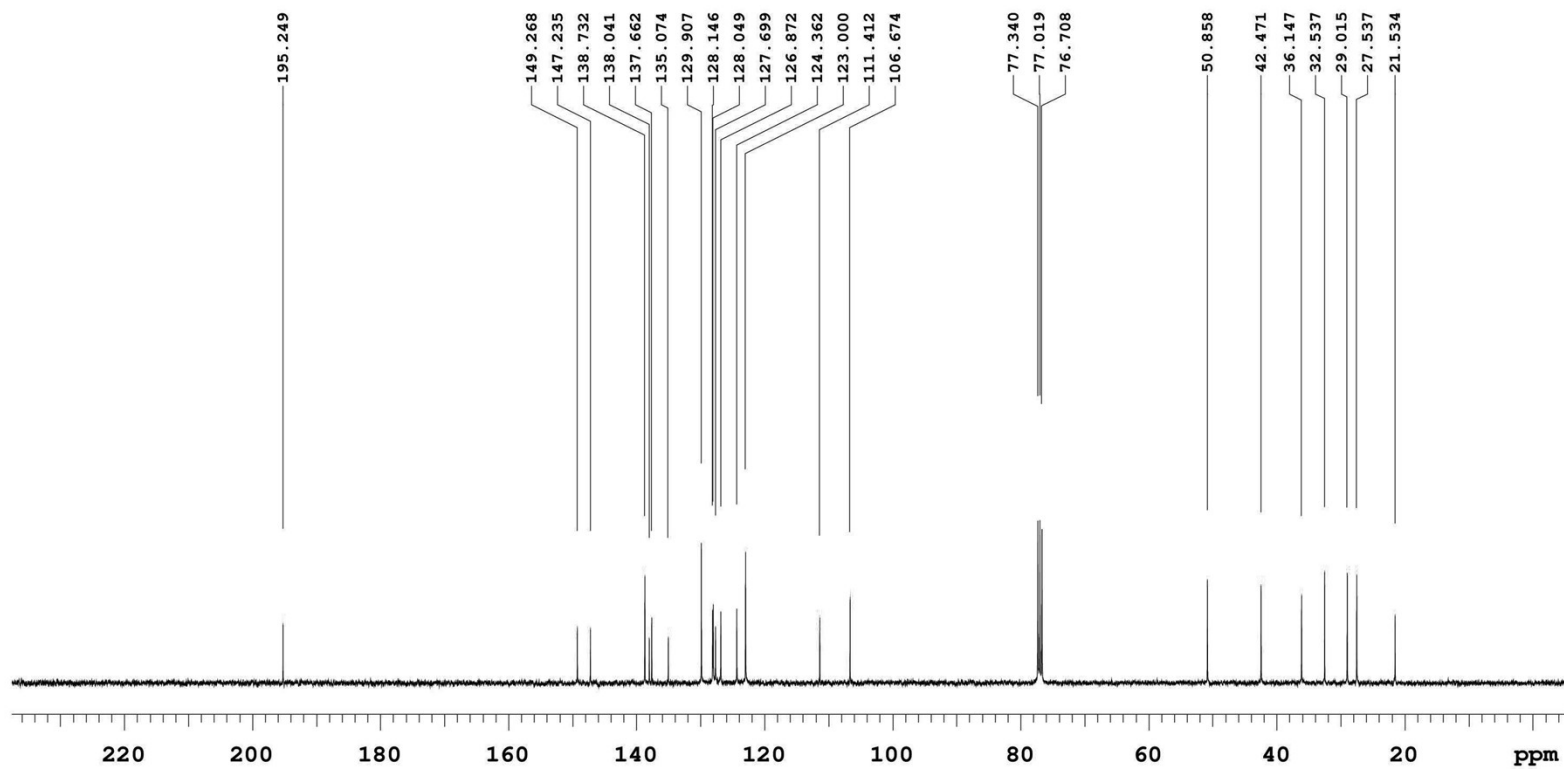



$^1\text{H}$  NMR of **2c** in  $\text{CDCl}_3$

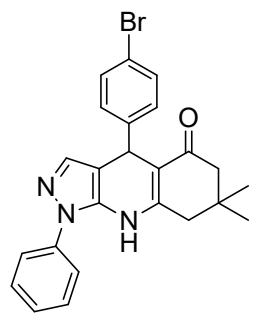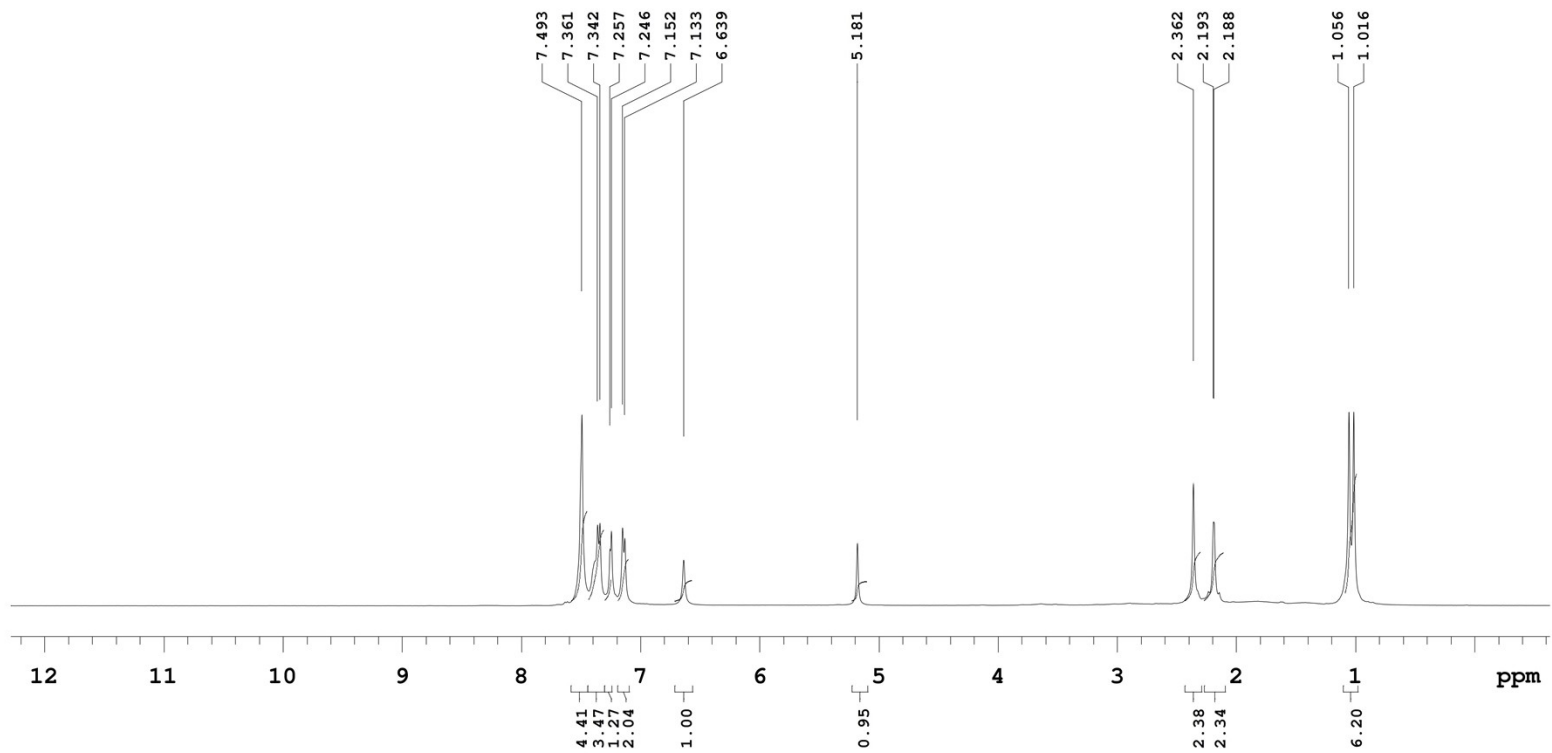

$^{13}\text{C}$  NMR of **2c** in  $\text{CDCl}_3$

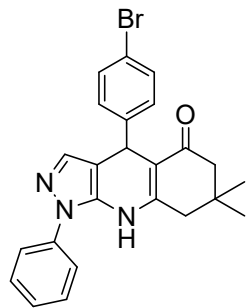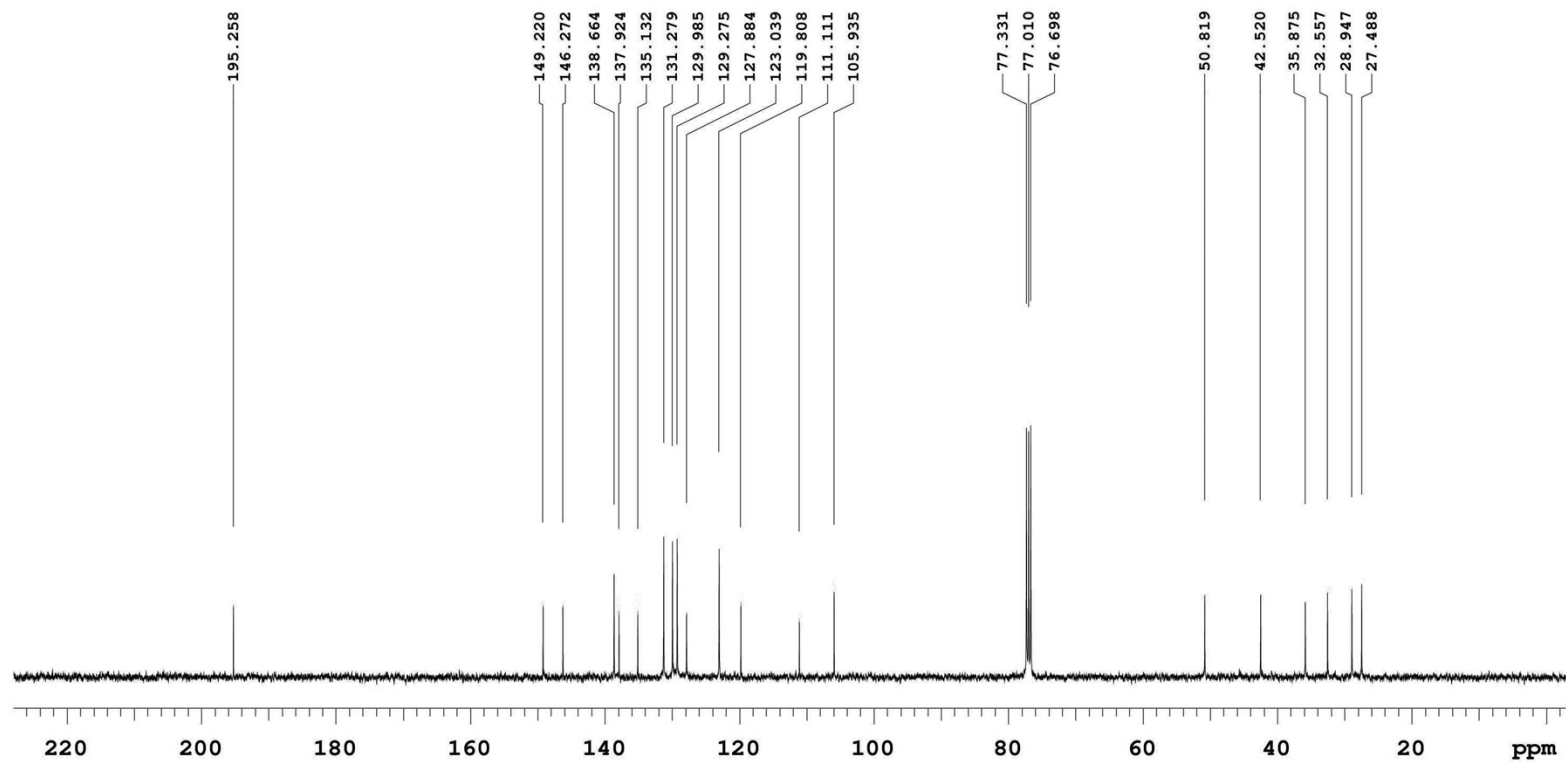

<sup>1</sup>H NMR of **2d** in CDCl<sub>3</sub>

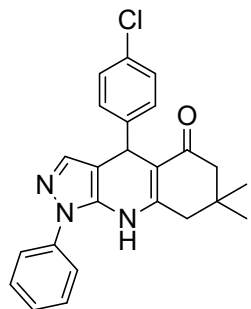

7.570  
7.550  
7.534  
7.447  
7.432  
7.415  
7.395  
7.374  
7.287  
7.187  
7.167  
6.553  
— 5.223

2.411  
2.240  
2.232  
1.183  
1.169  
1.152  
1.136  
1.096  
1.053

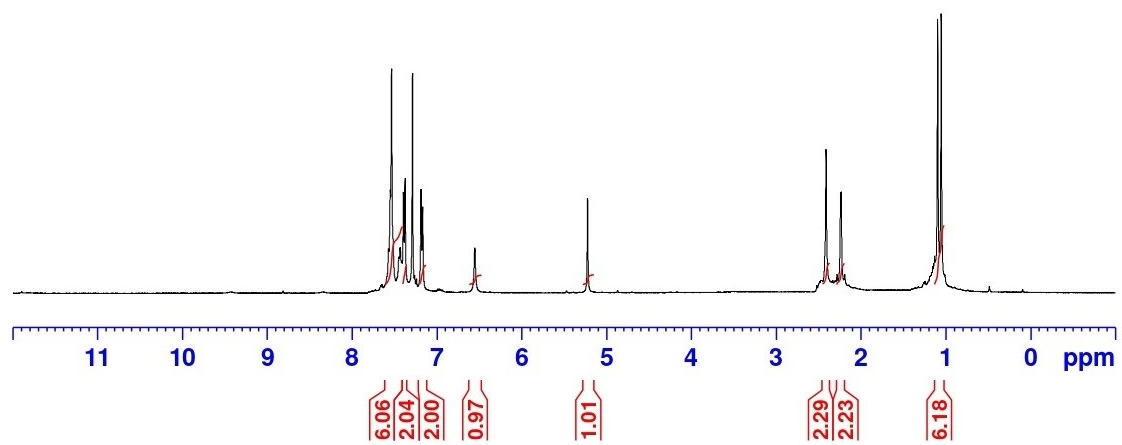

$^{13}\text{C}$  NMR of **2d** in  $\text{CDCl}_3$

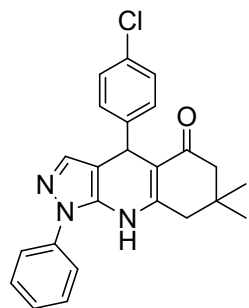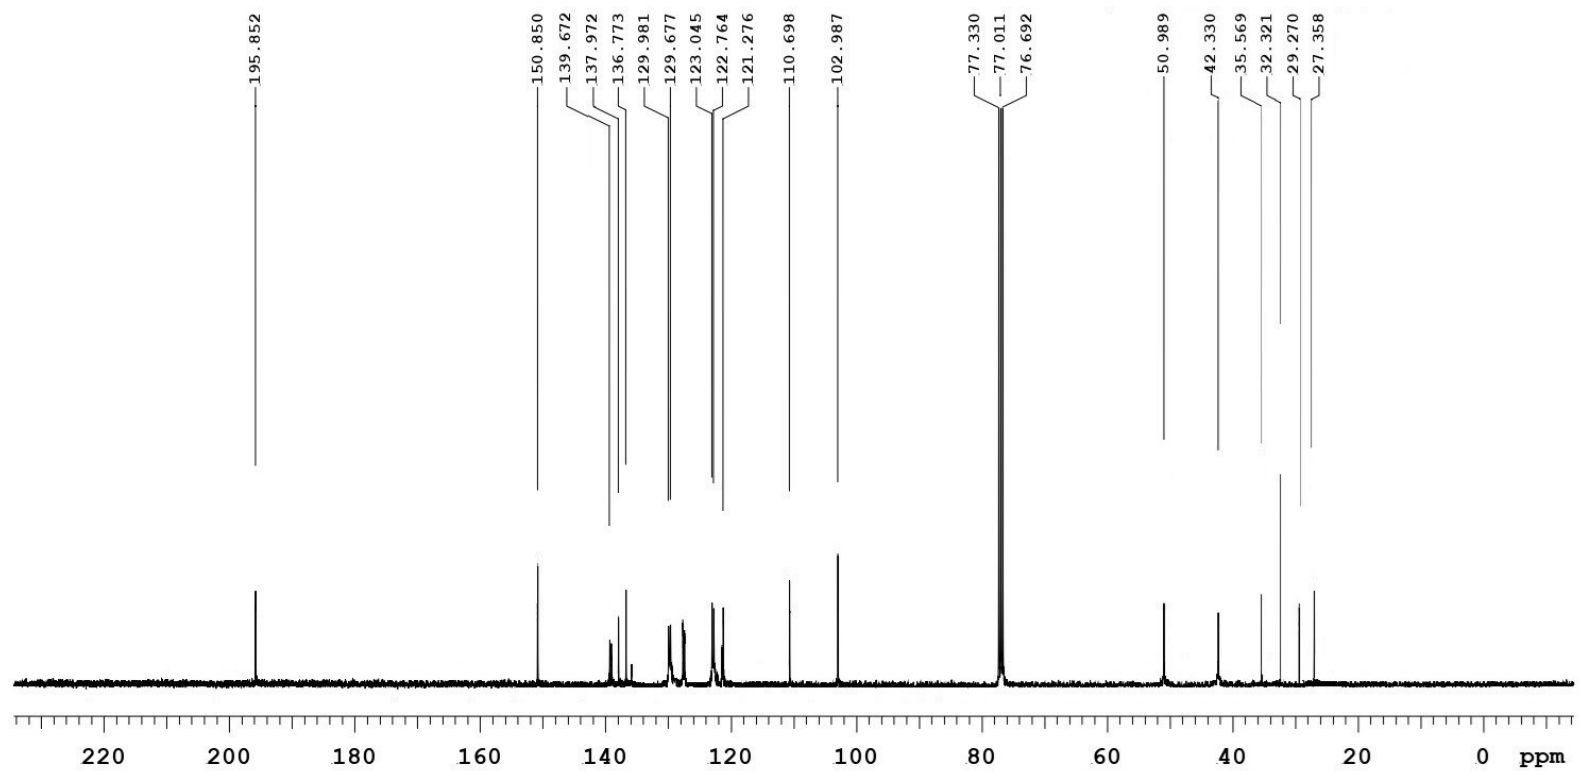

$^1\text{H}$  NMR of **2e** in  $\text{CDCl}_3$

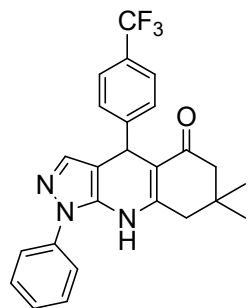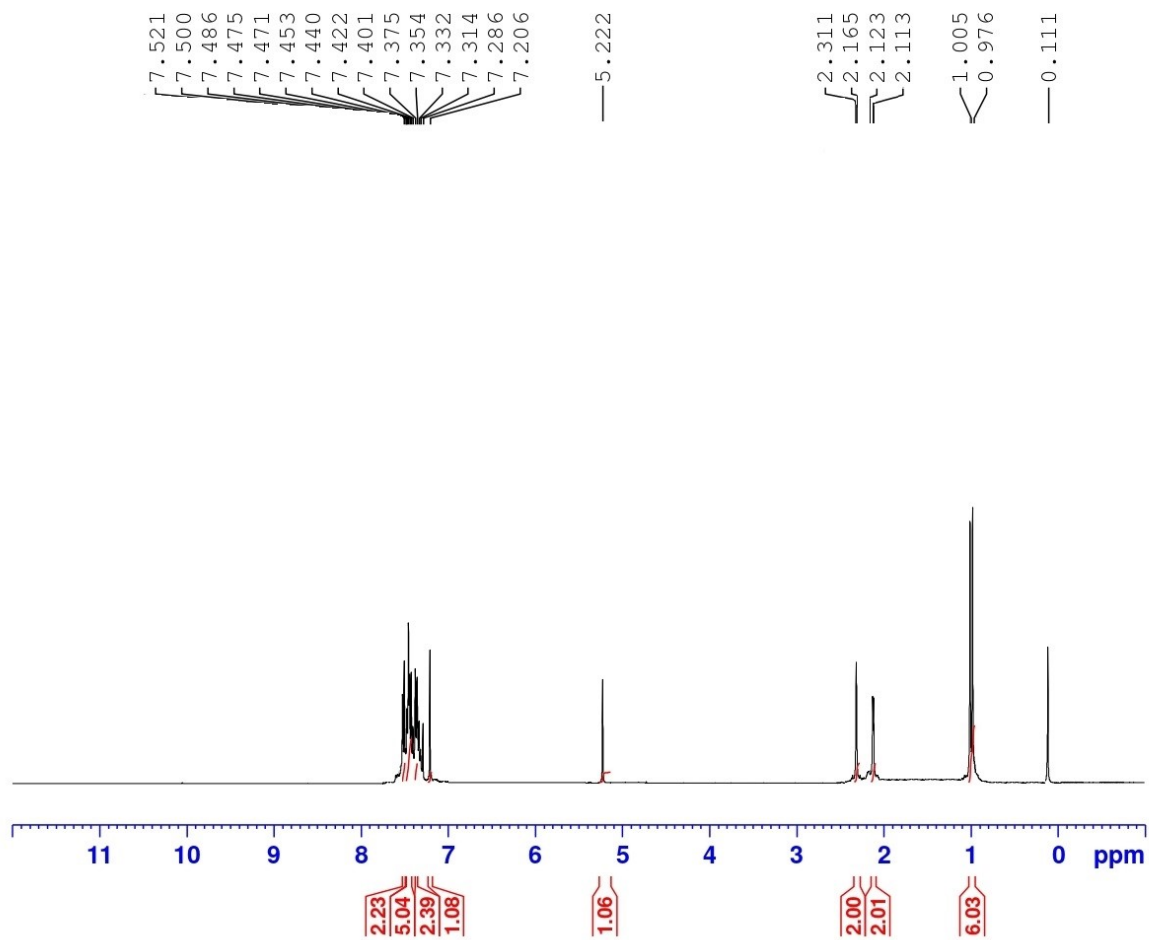

$^{13}\text{C}$  NMR of **2e** in  $\text{CDCl}_3$

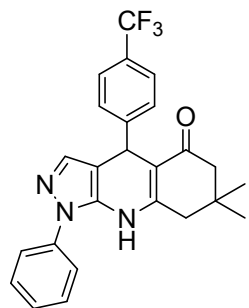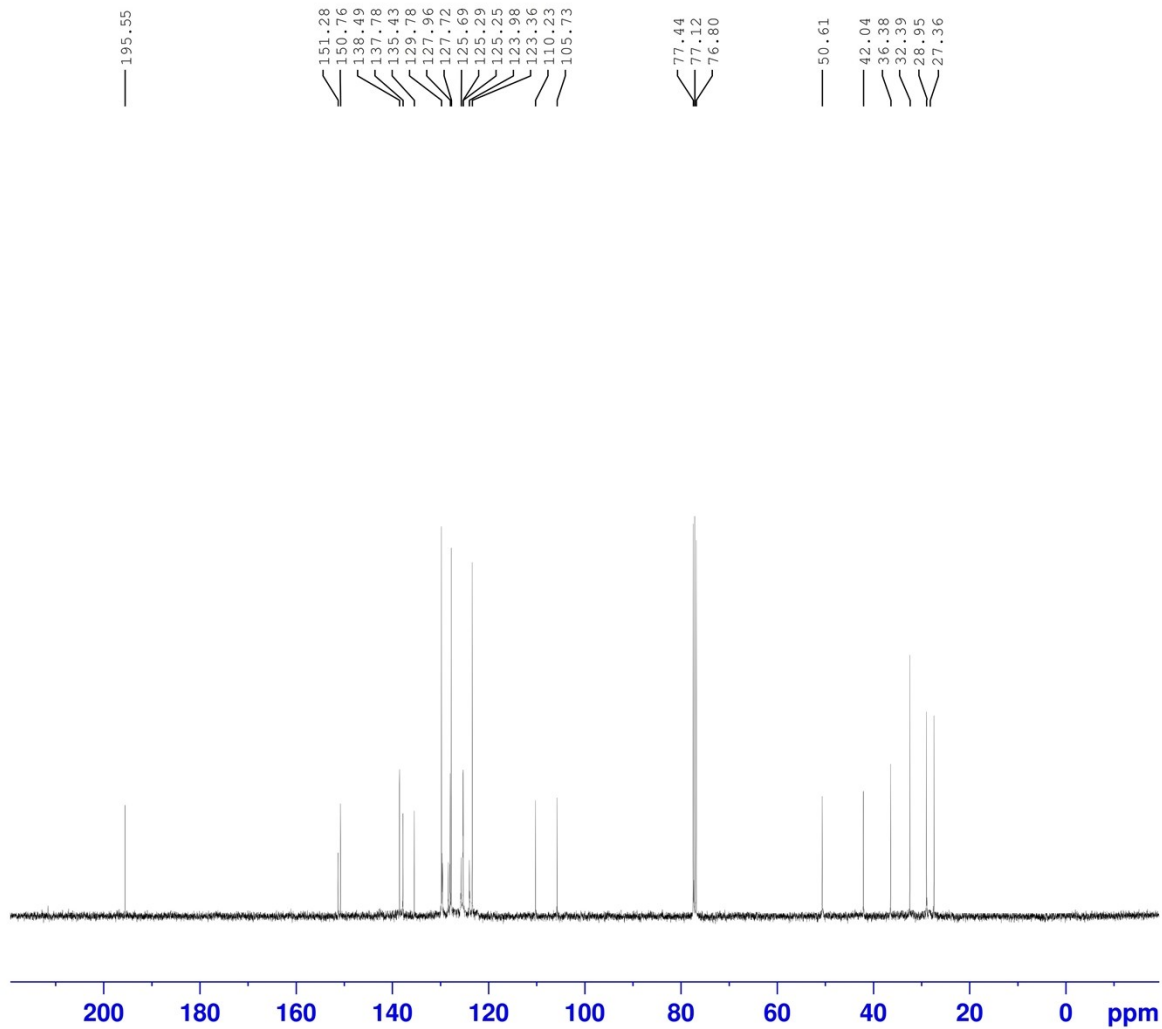

$^{19}\text{F}$  NMR of **2e** in  $\text{CDCl}_3$

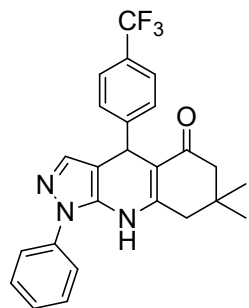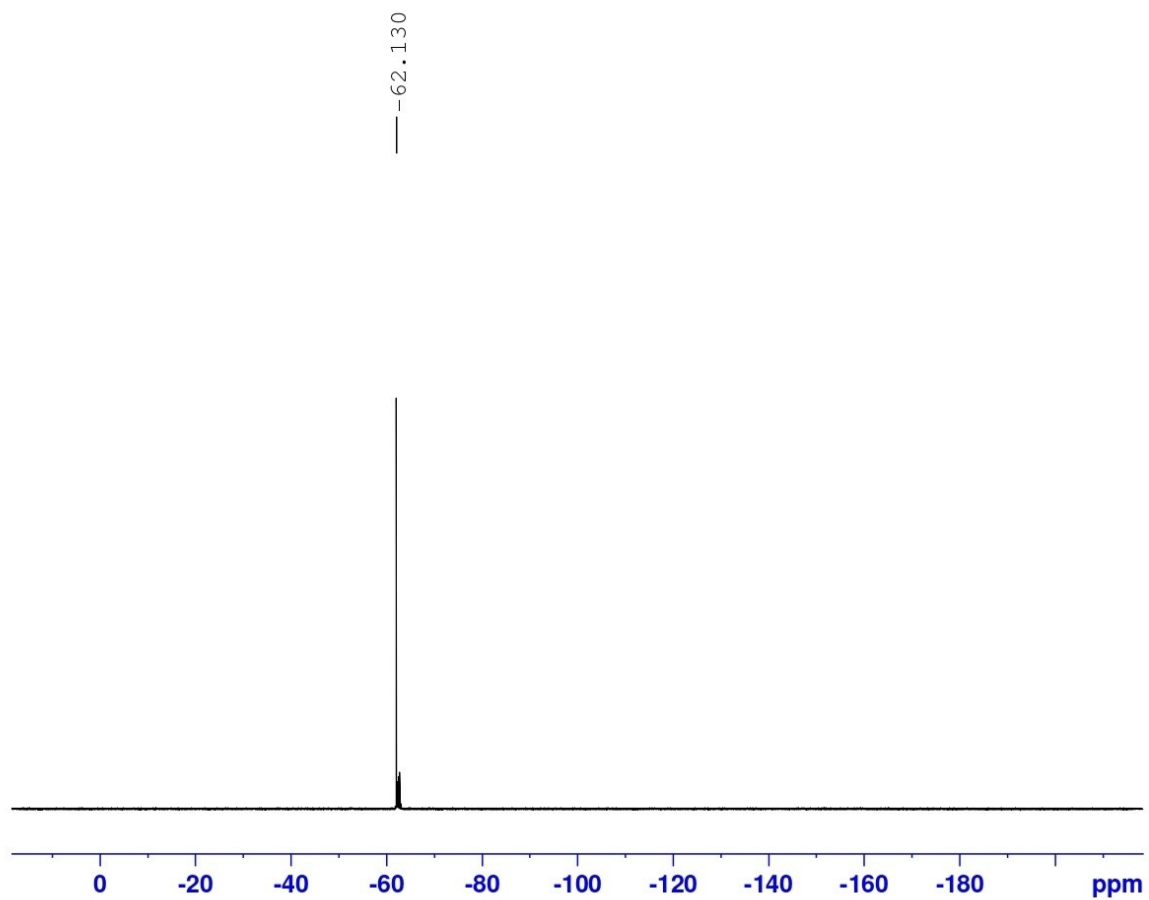

$^1\text{H}$  NMR of **2f** in  $\text{CDCl}_3$

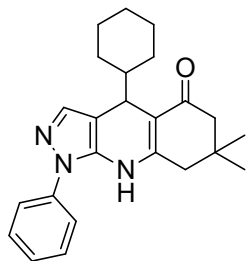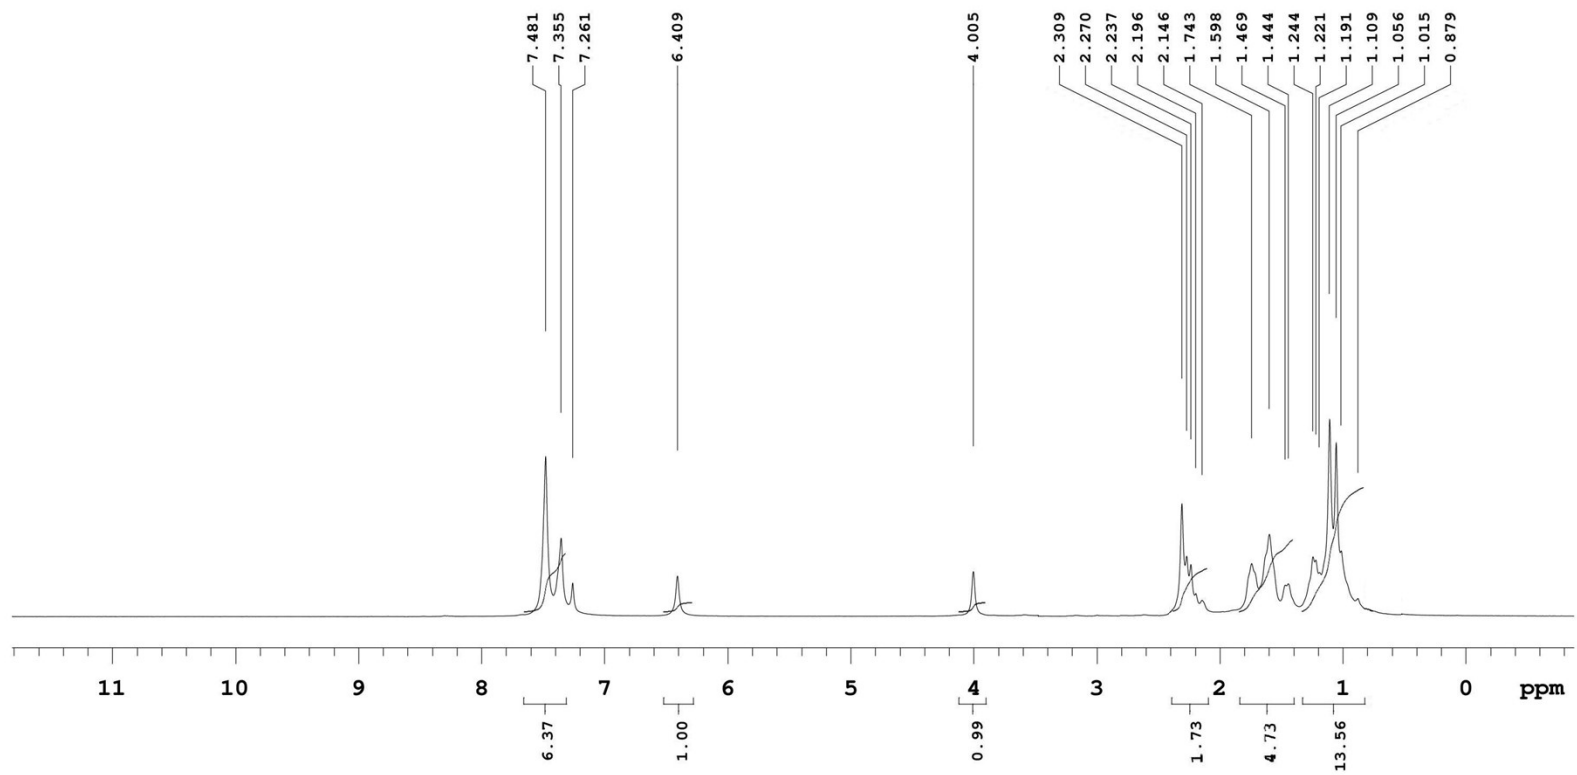



$^{13}\text{C}$  NMR of **2f** in  $\text{CDCl}_3$

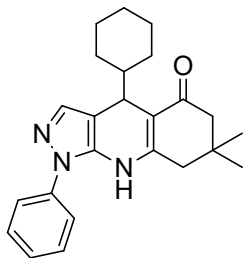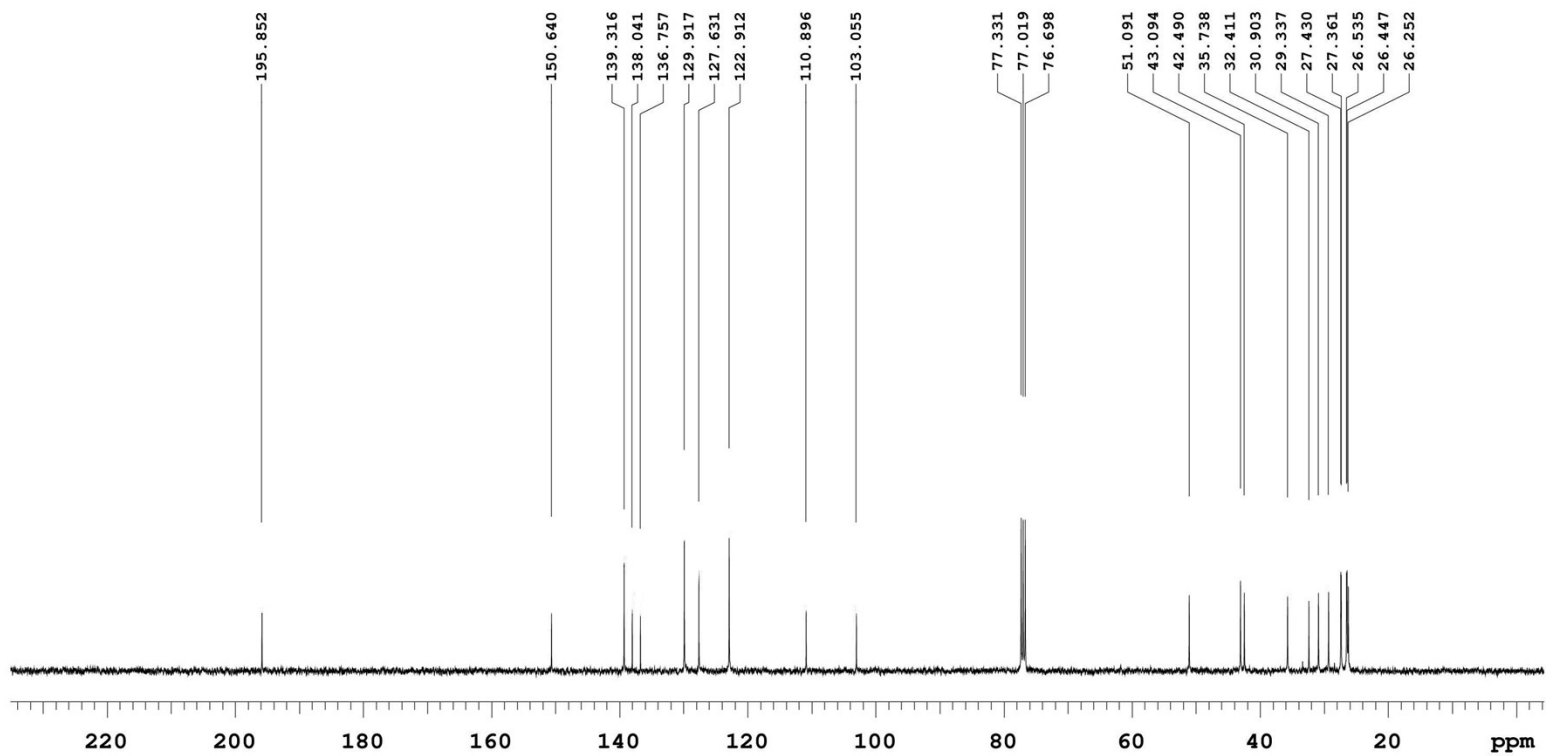

<sup>1</sup>H NMR of **2g** in CDCl<sub>3</sub>

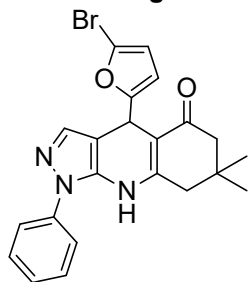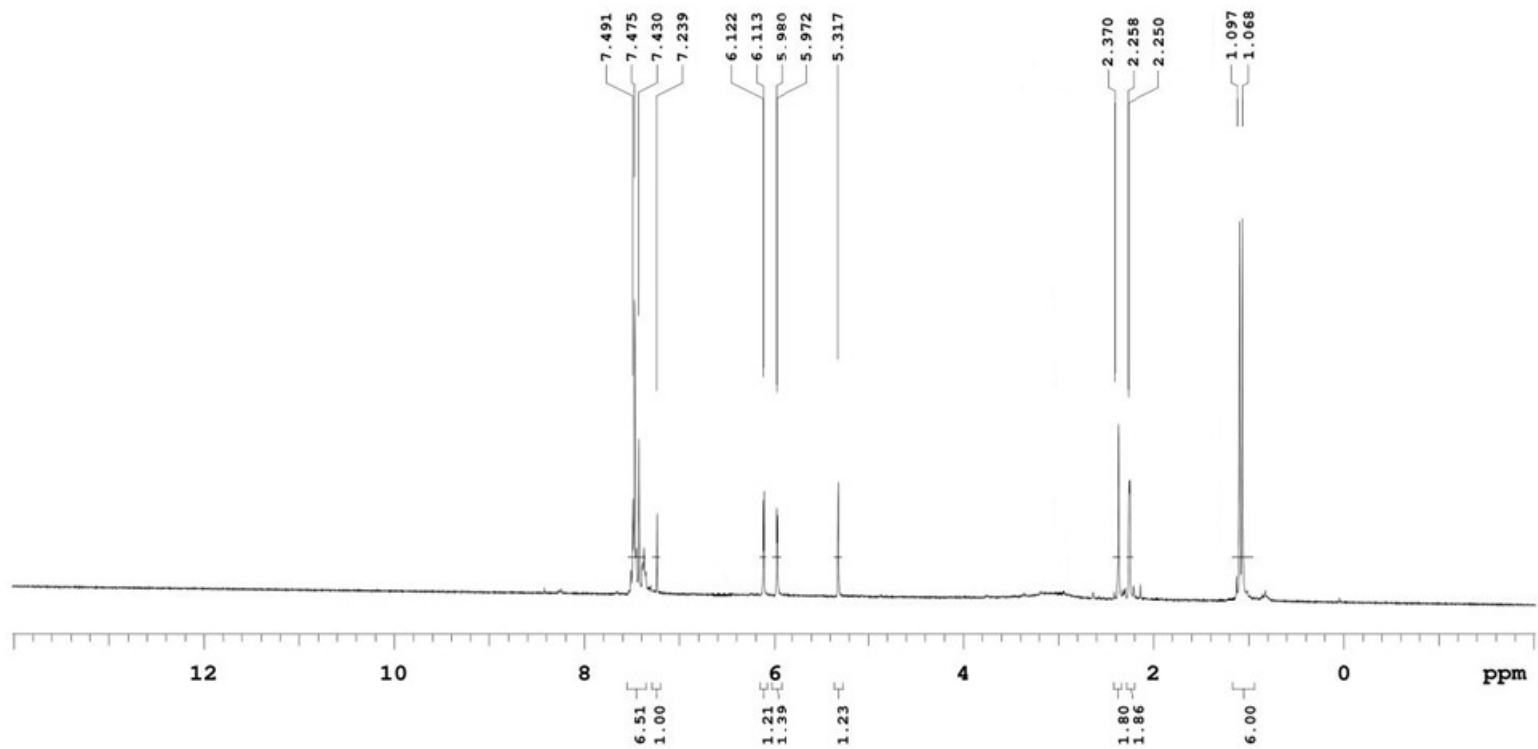

$^{13}\text{C}$  NMR of **2g** in  $\text{CDCl}_3$

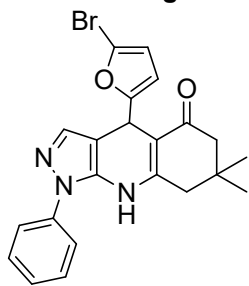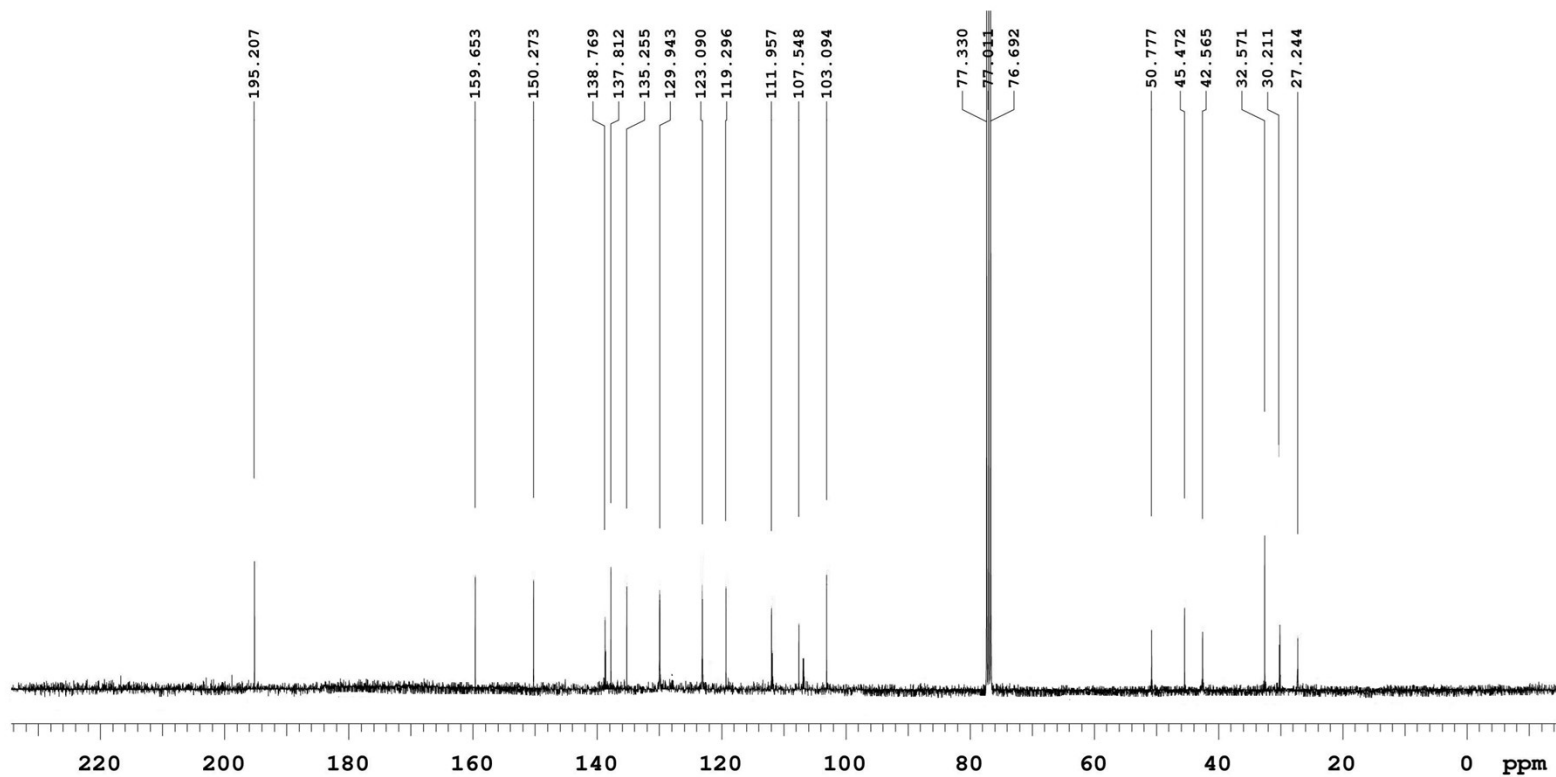

<sup>1</sup>H NMR of **3a** in CDCl<sub>3</sub>

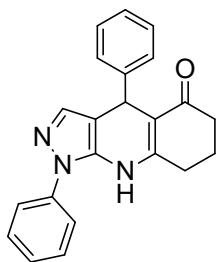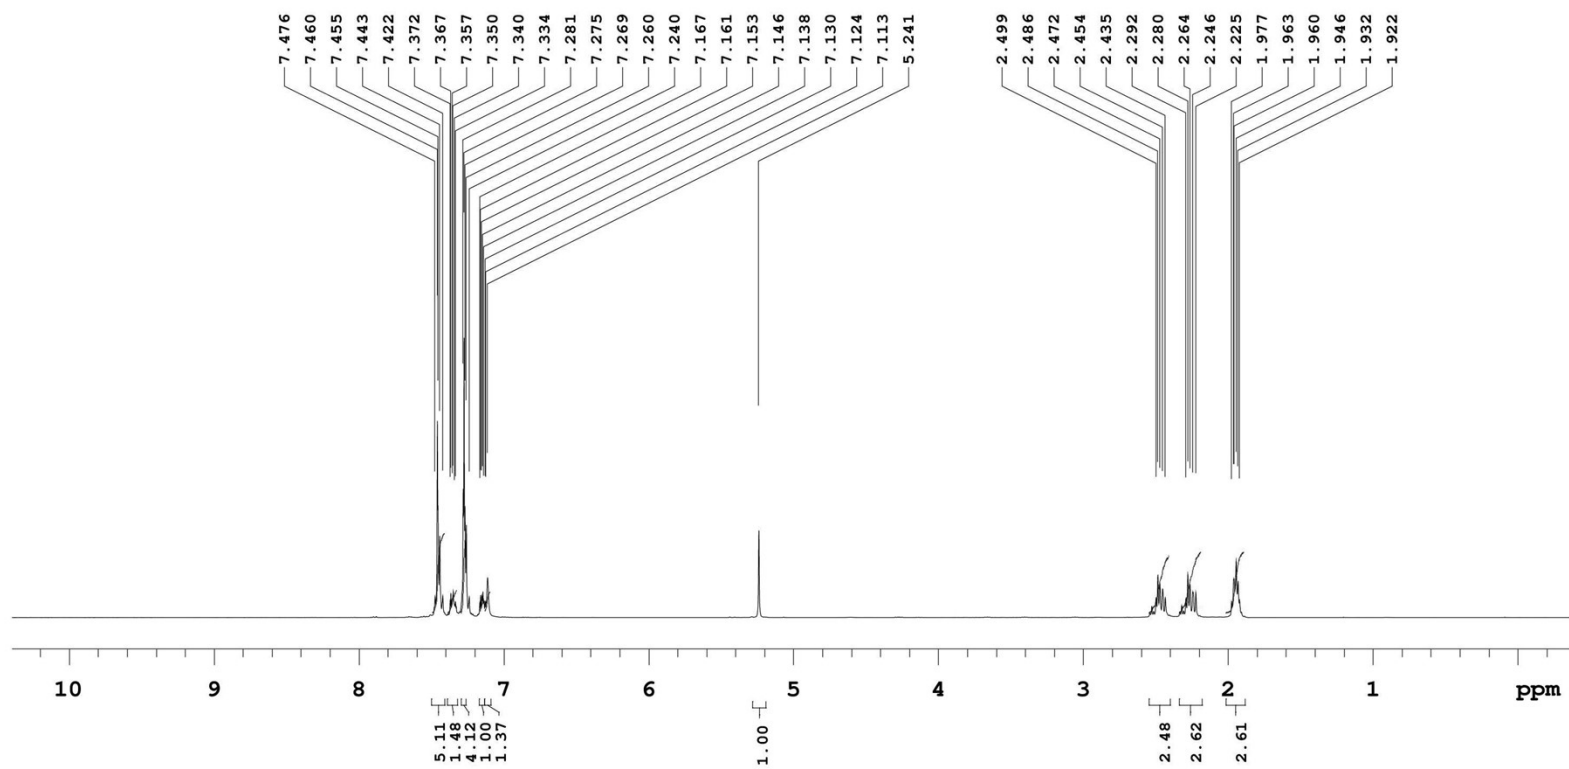

$^{13}\text{C}$  NMR of **3a** in  $\text{CDCl}_3$

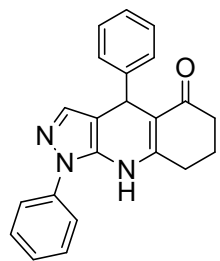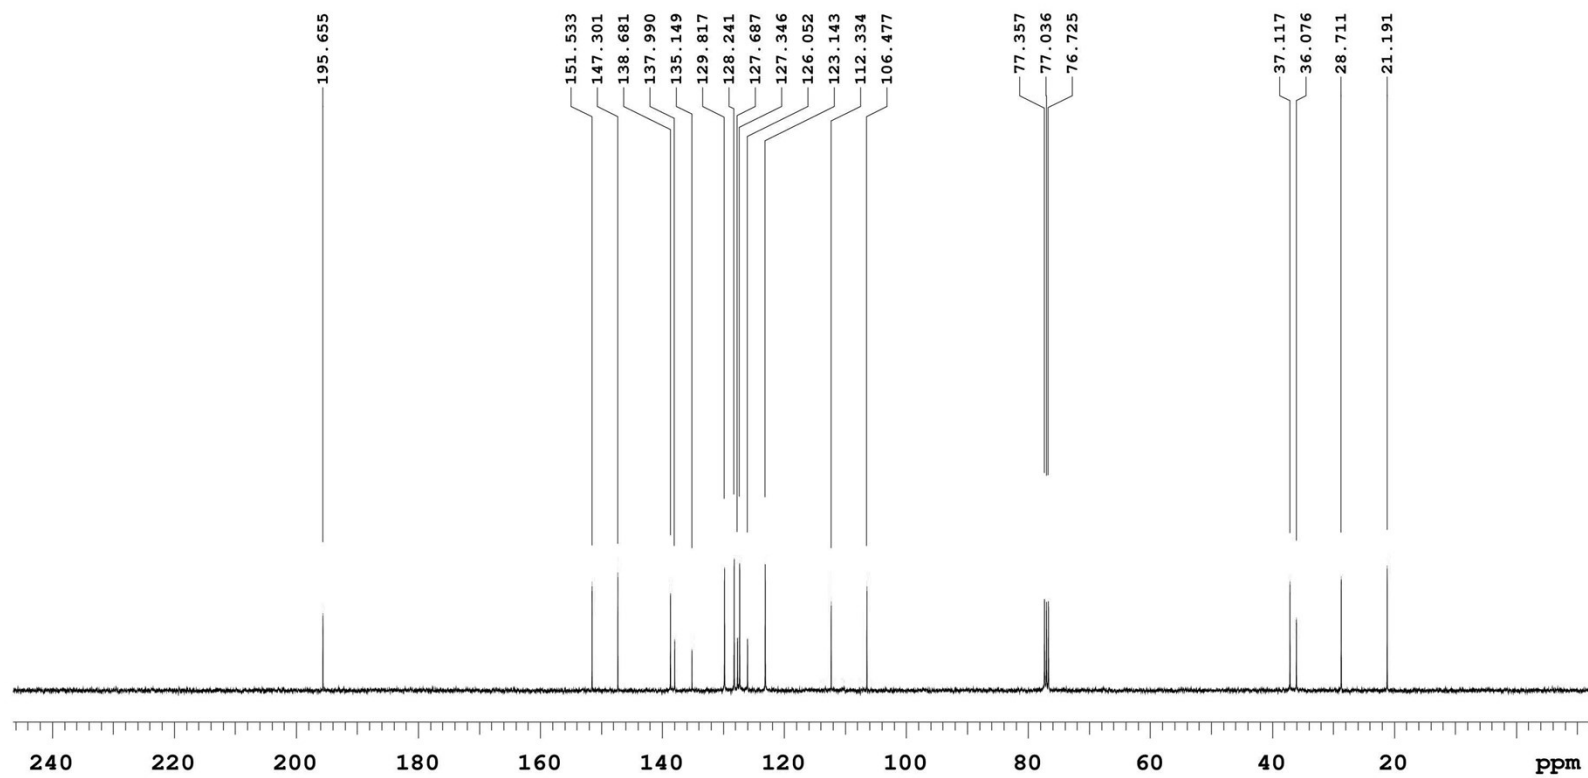

<sup>1</sup>H NMR of **3b** in CDCl<sub>3</sub>

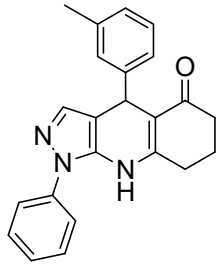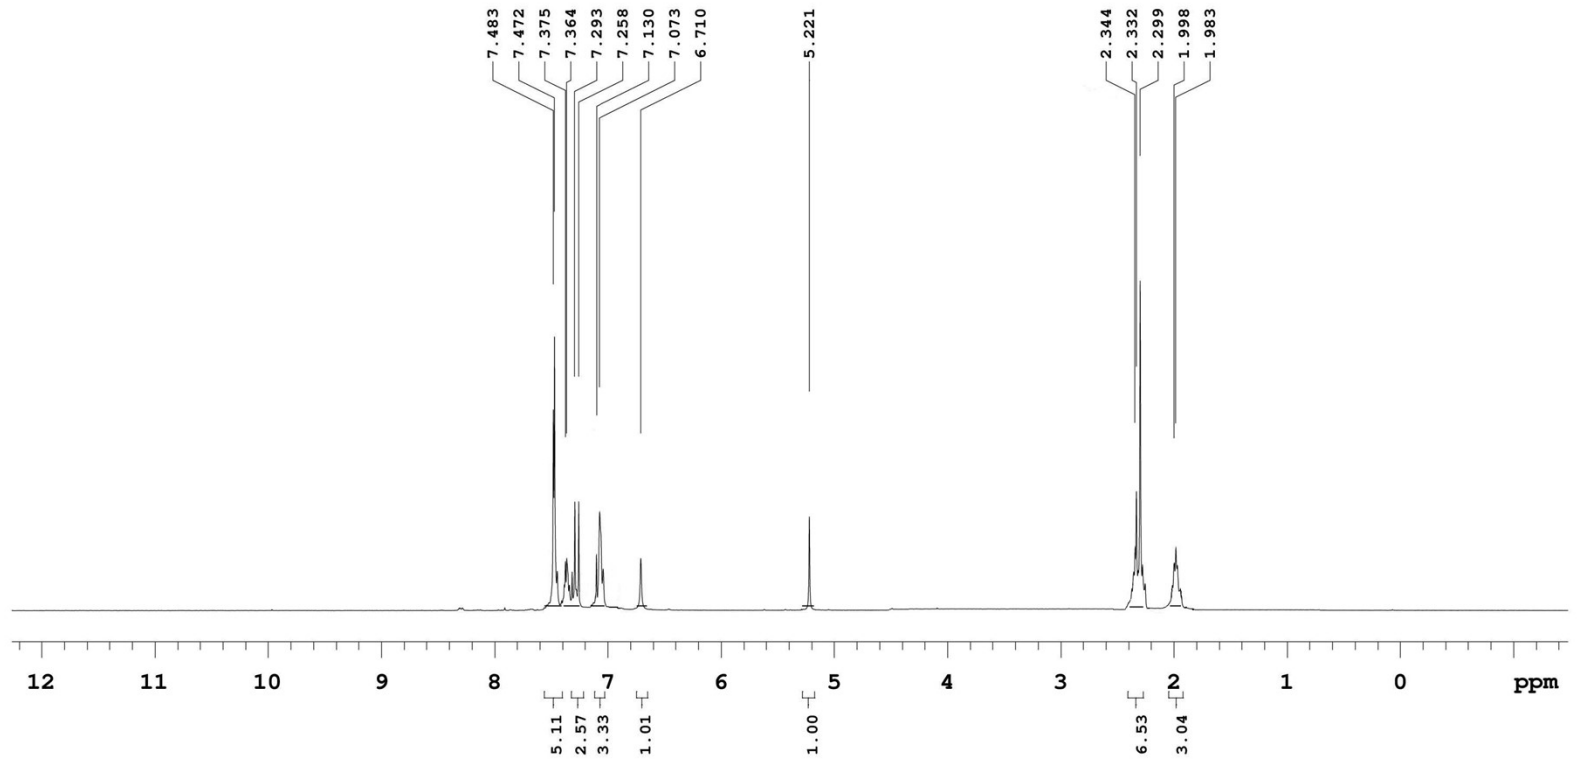

$^{13}\text{C}$  NMR of **3b** in  $\text{CDCl}_3$

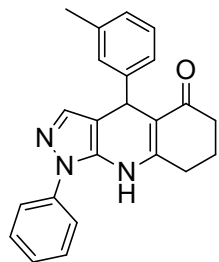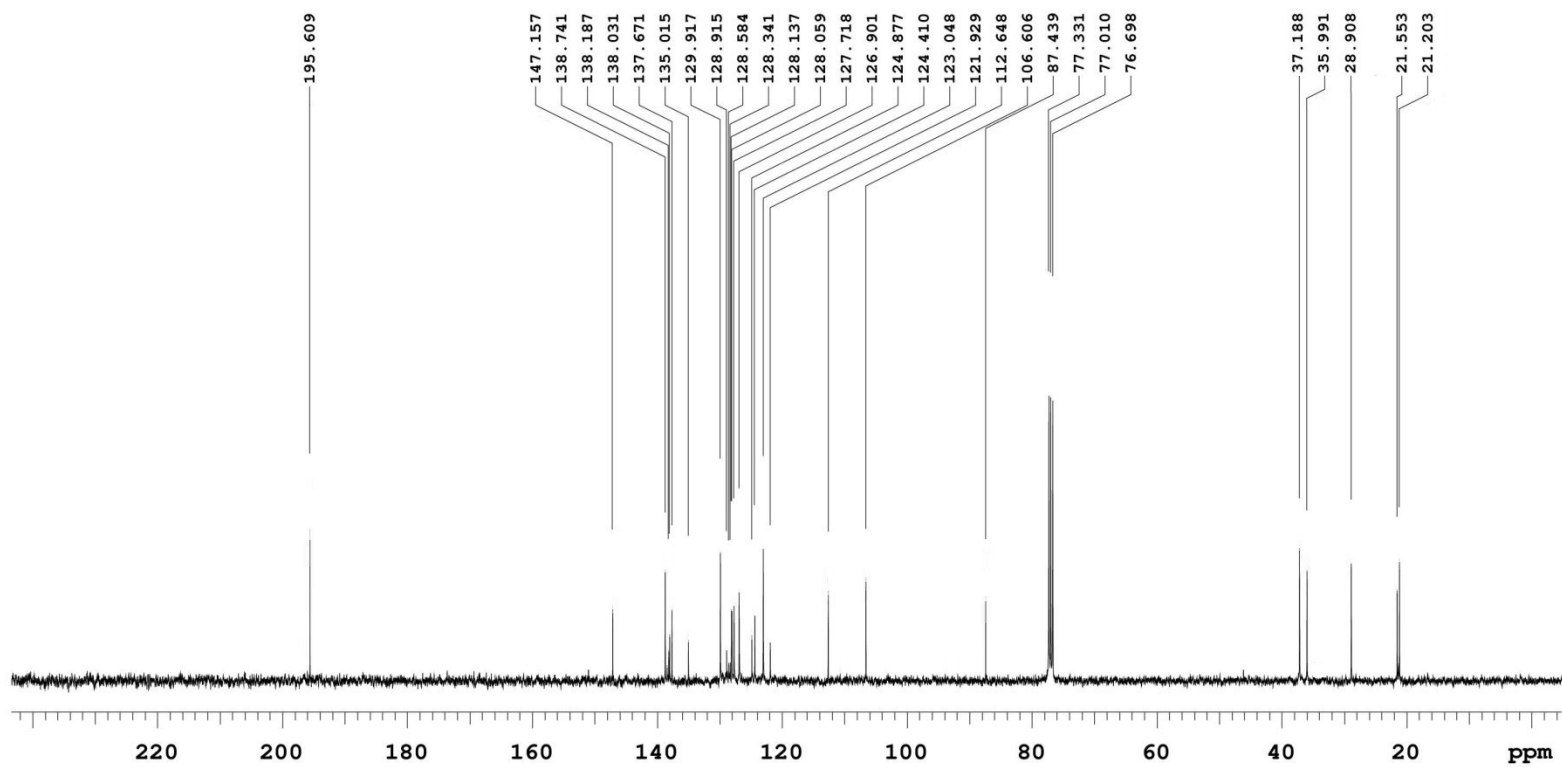

<sup>1</sup>H NMR of **3c** in CDCl<sub>3</sub>

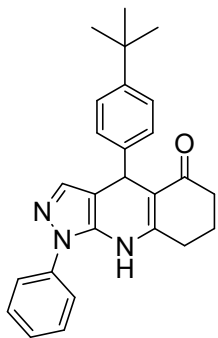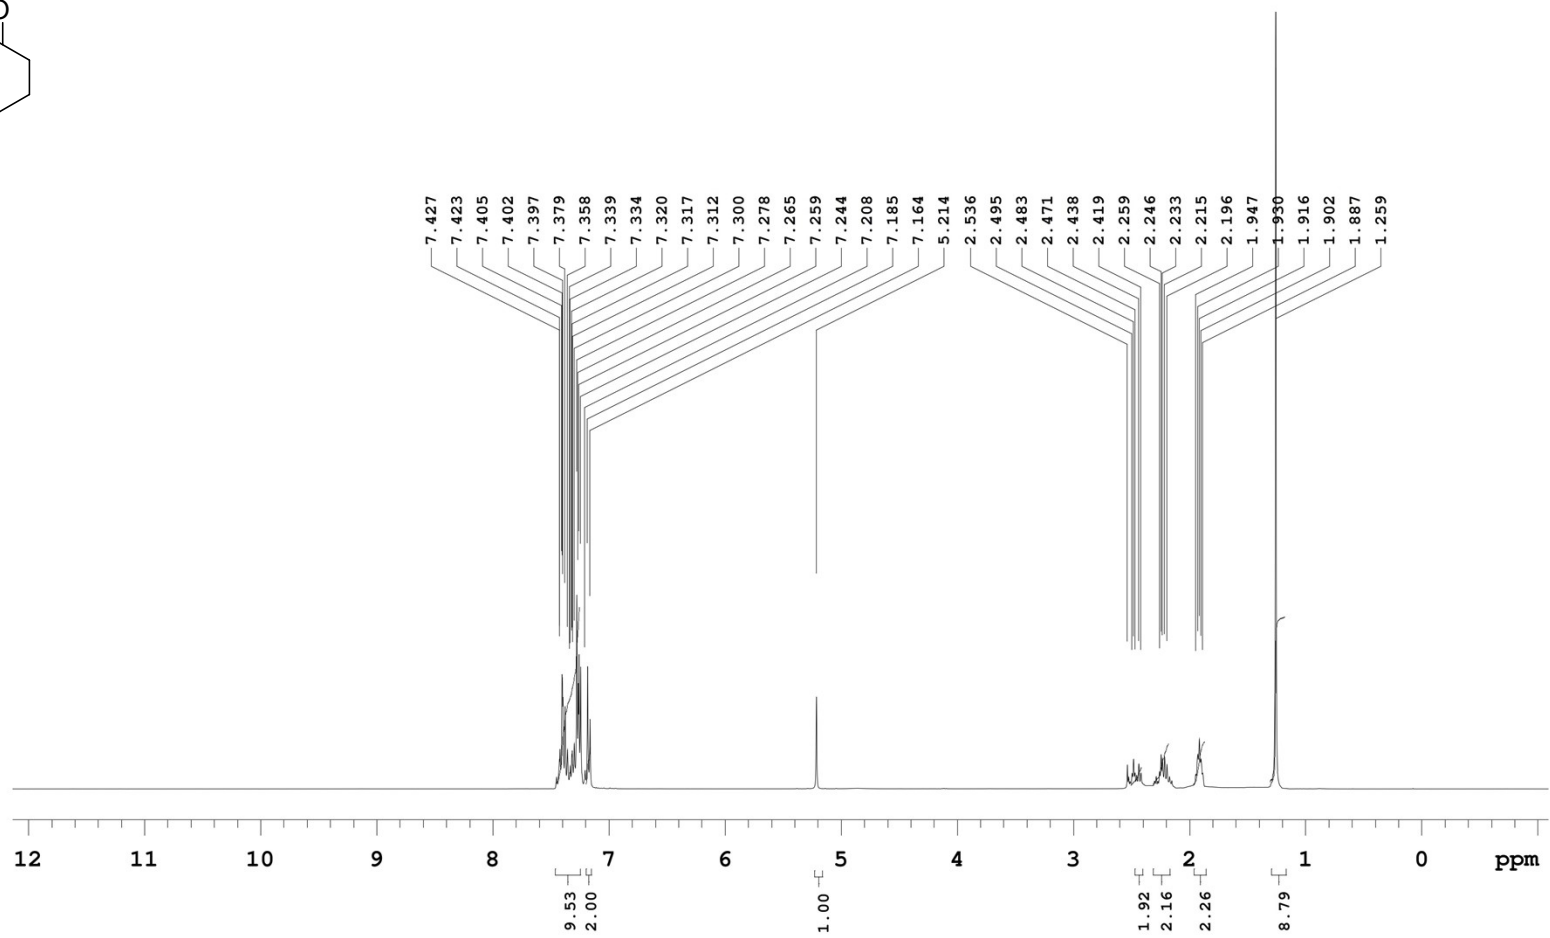



$^{13}\text{C}$  NMR of **3c** in  $\text{CDCl}_3$

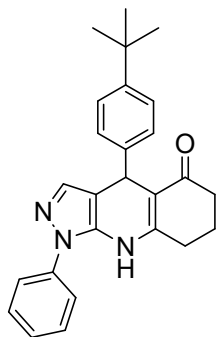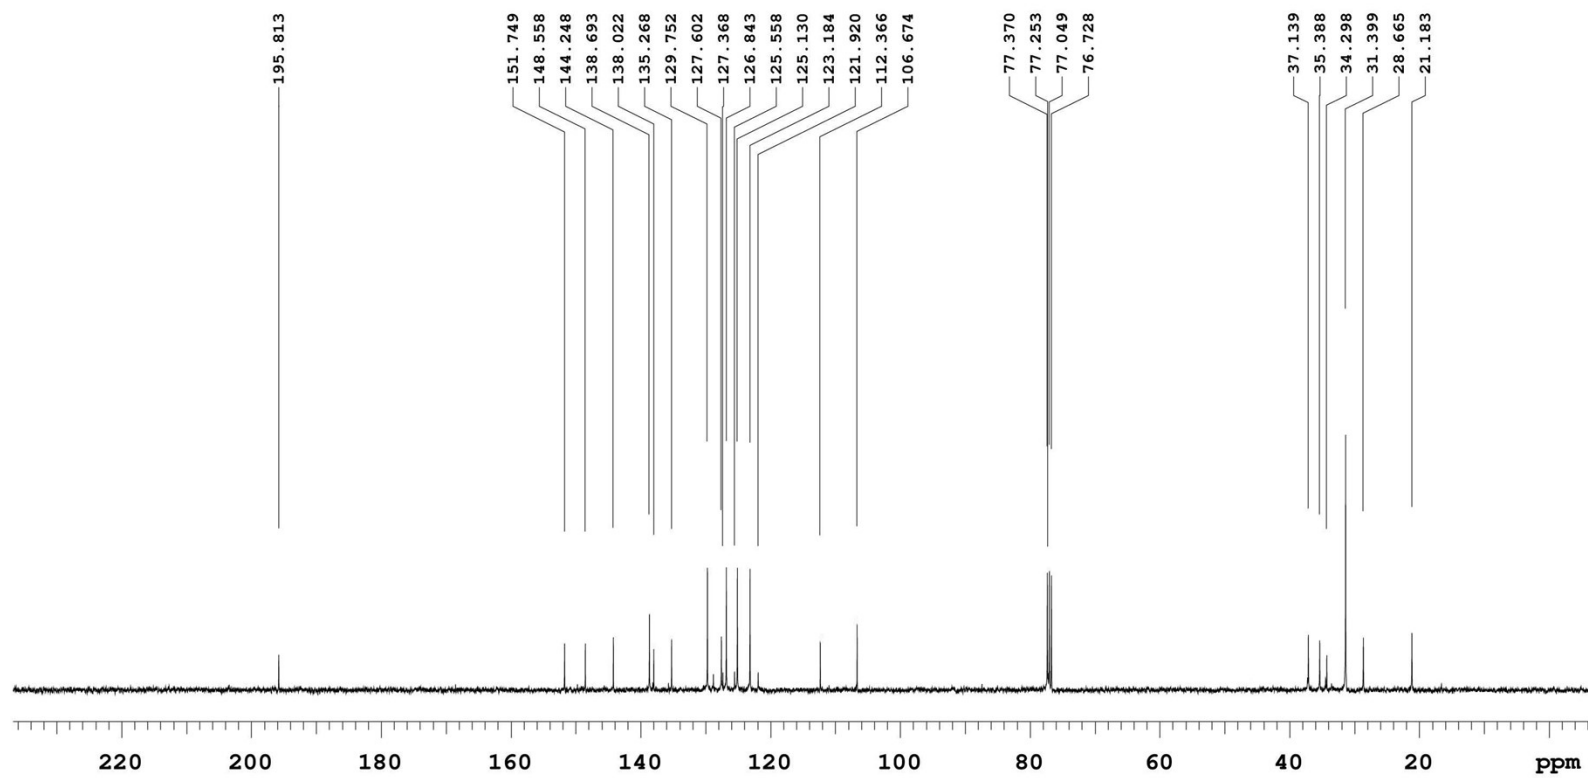

$^1\text{H}$  NMR of **3d** in  $\text{CDCl}_3$

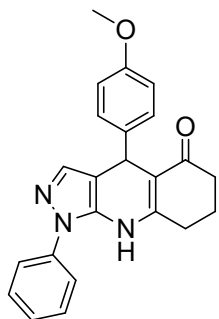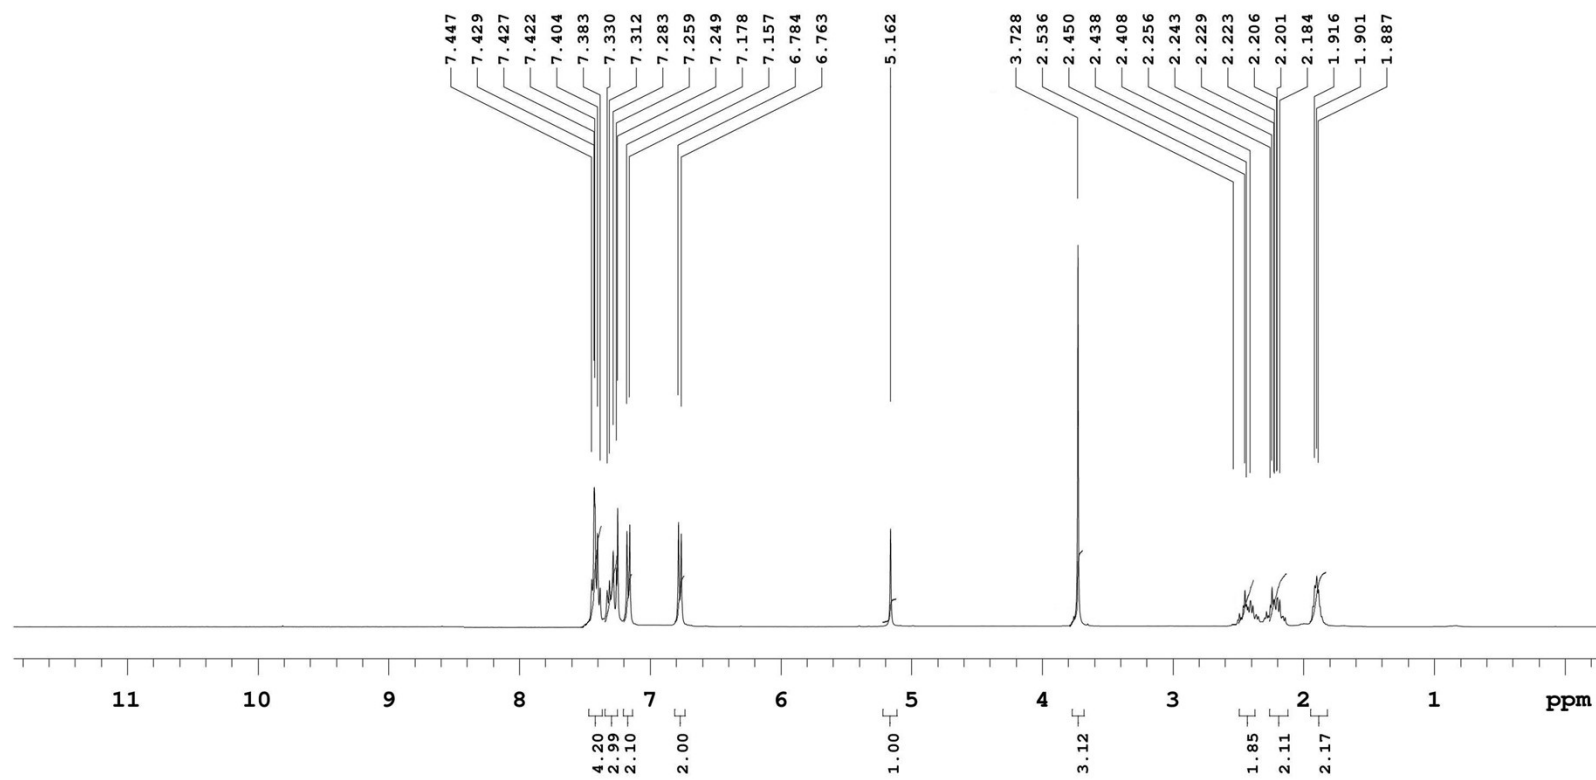

$^{13}\text{C}$  NMR of **3d** in  $\text{CDCl}_3$

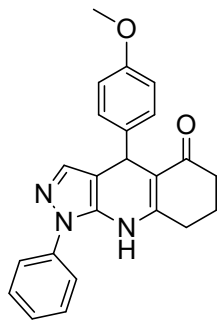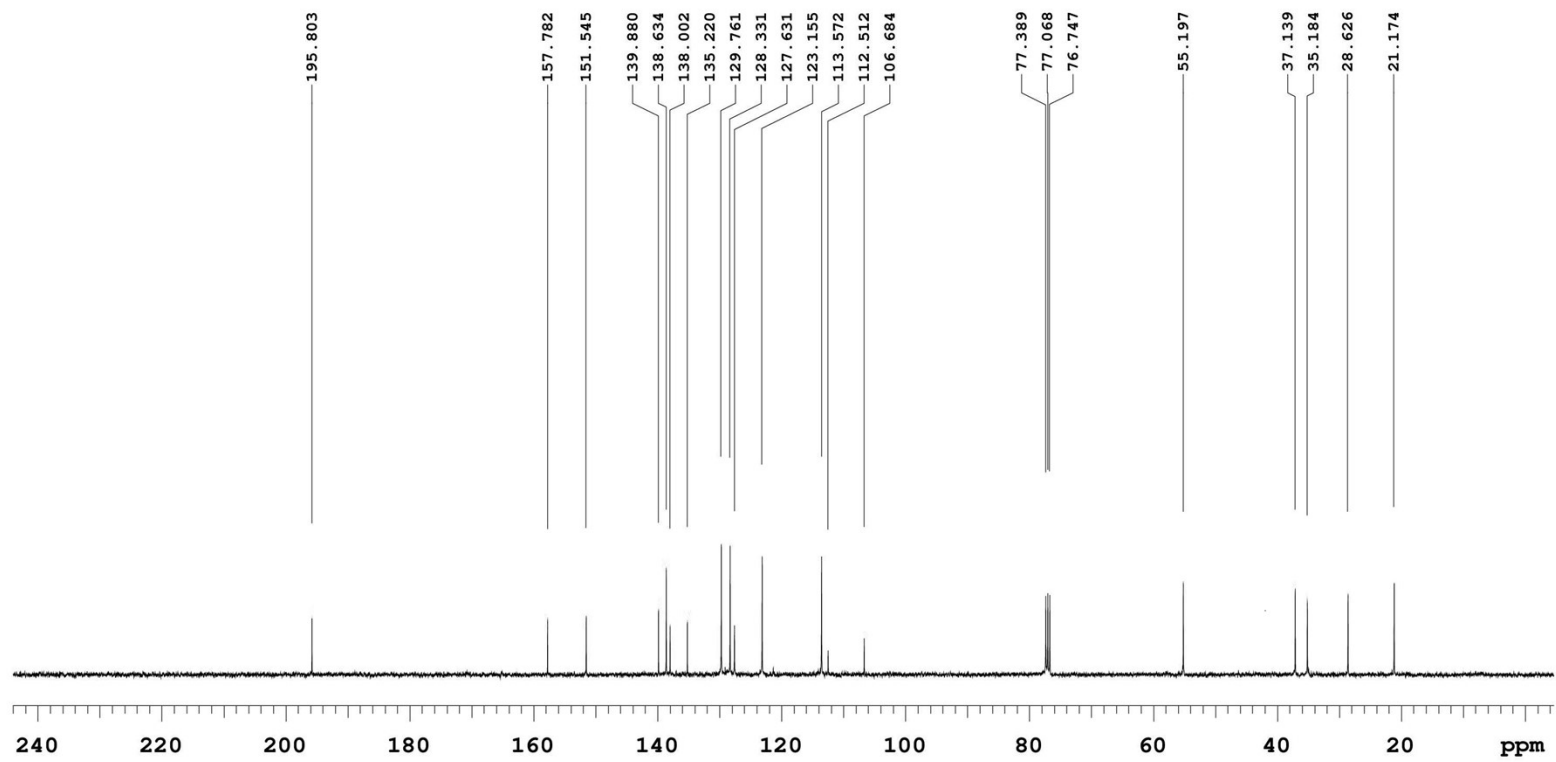

$^1\text{H}$  NMR of **3e** in  $\text{CDCl}_3$

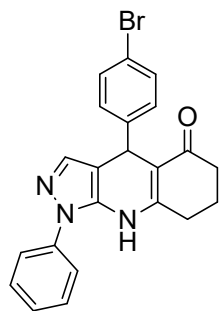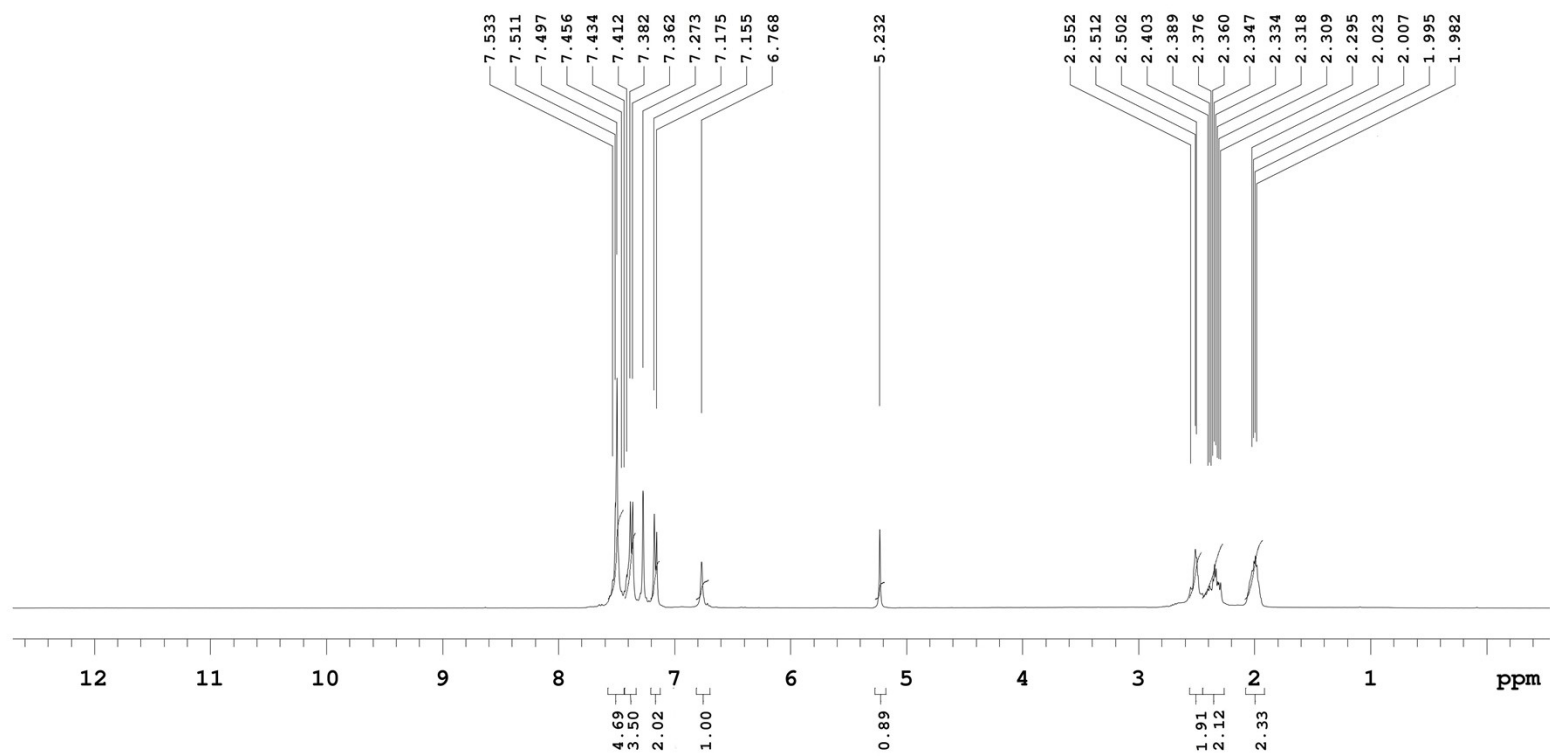

$^{13}\text{C}$  NMR of **3e** in  $\text{CDCl}_3$

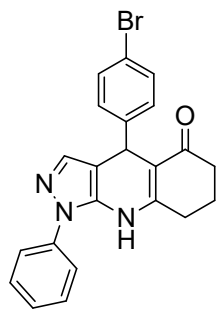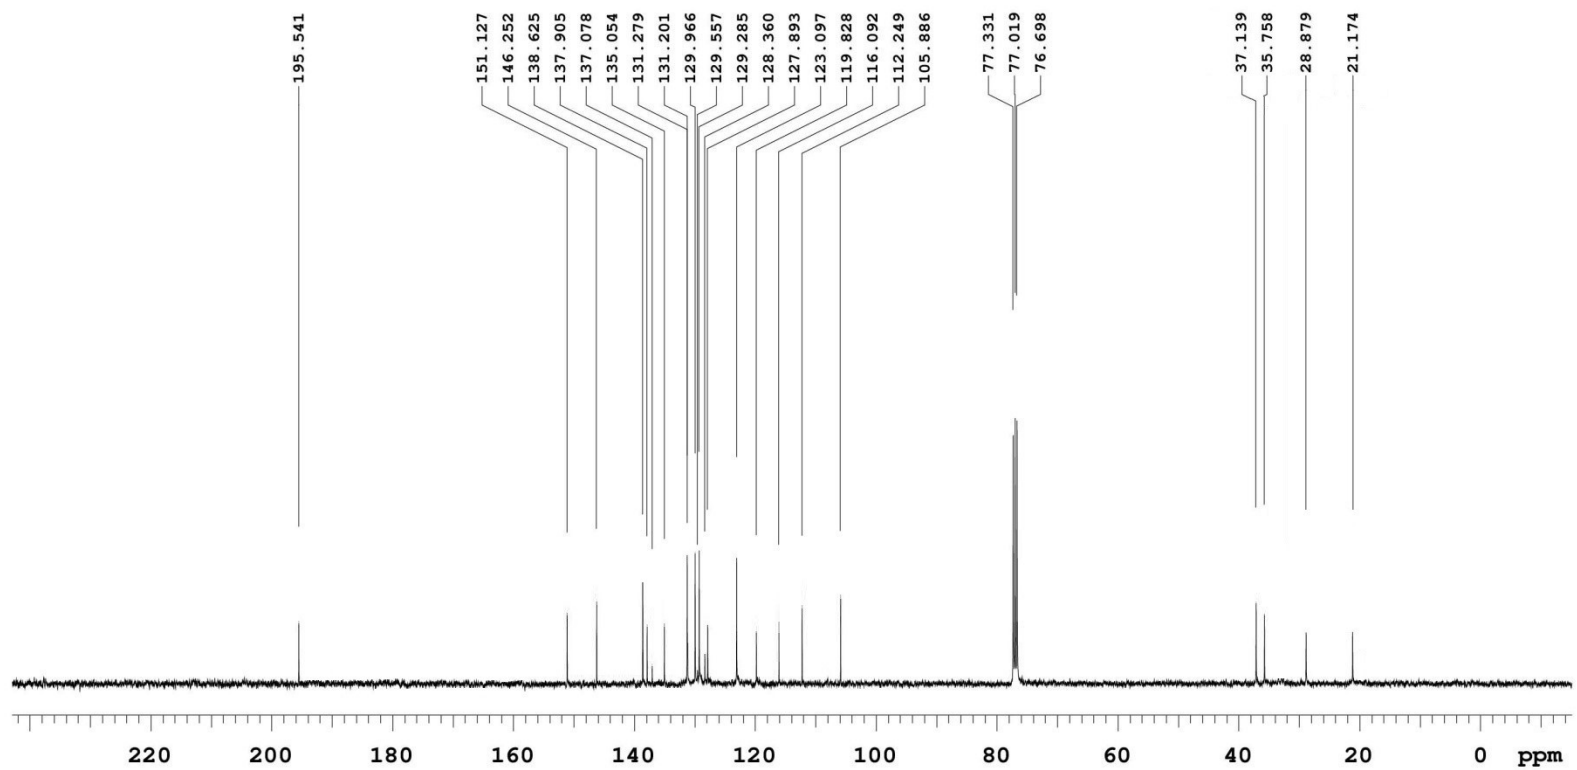

$^1\text{H}$  NMR of **3f** in  $\text{CDCl}_3$

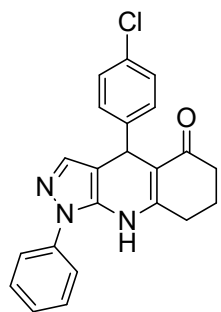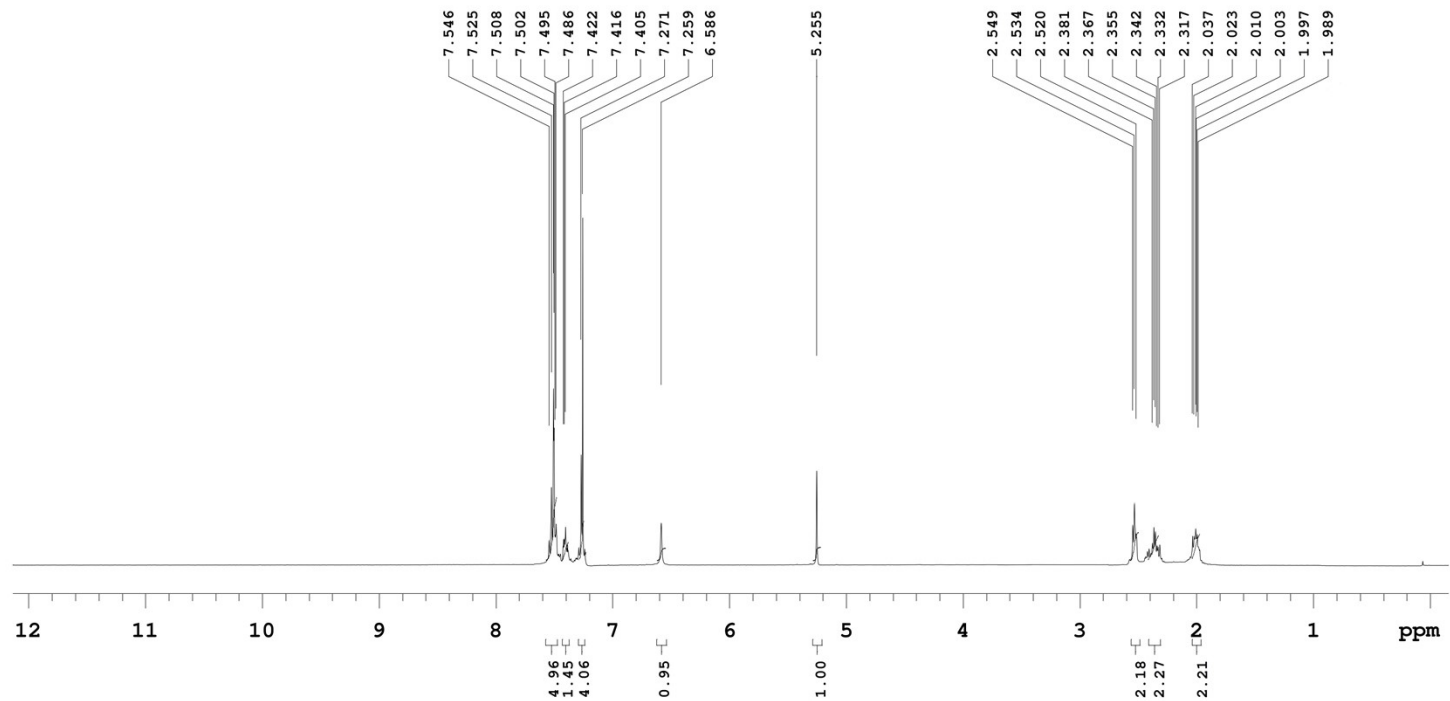

$^{13}\text{C}$  NMR of **3f** in  $\text{CDCl}_3$

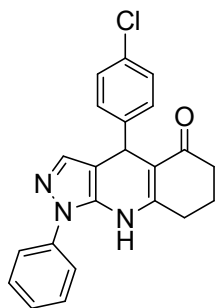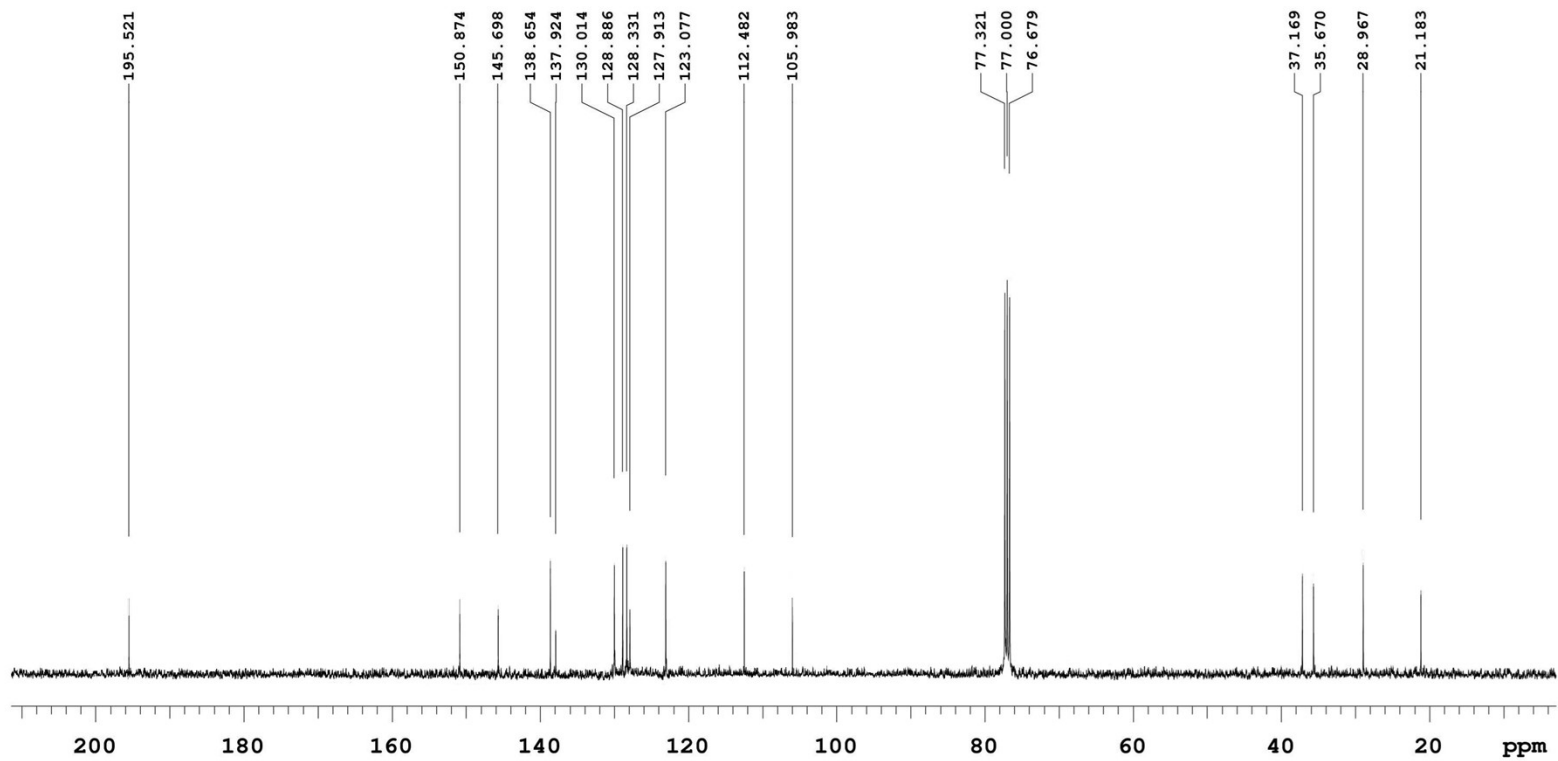

$^1\text{H}$  NMR of **3g** in  $\text{CDCl}_3$

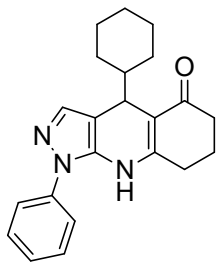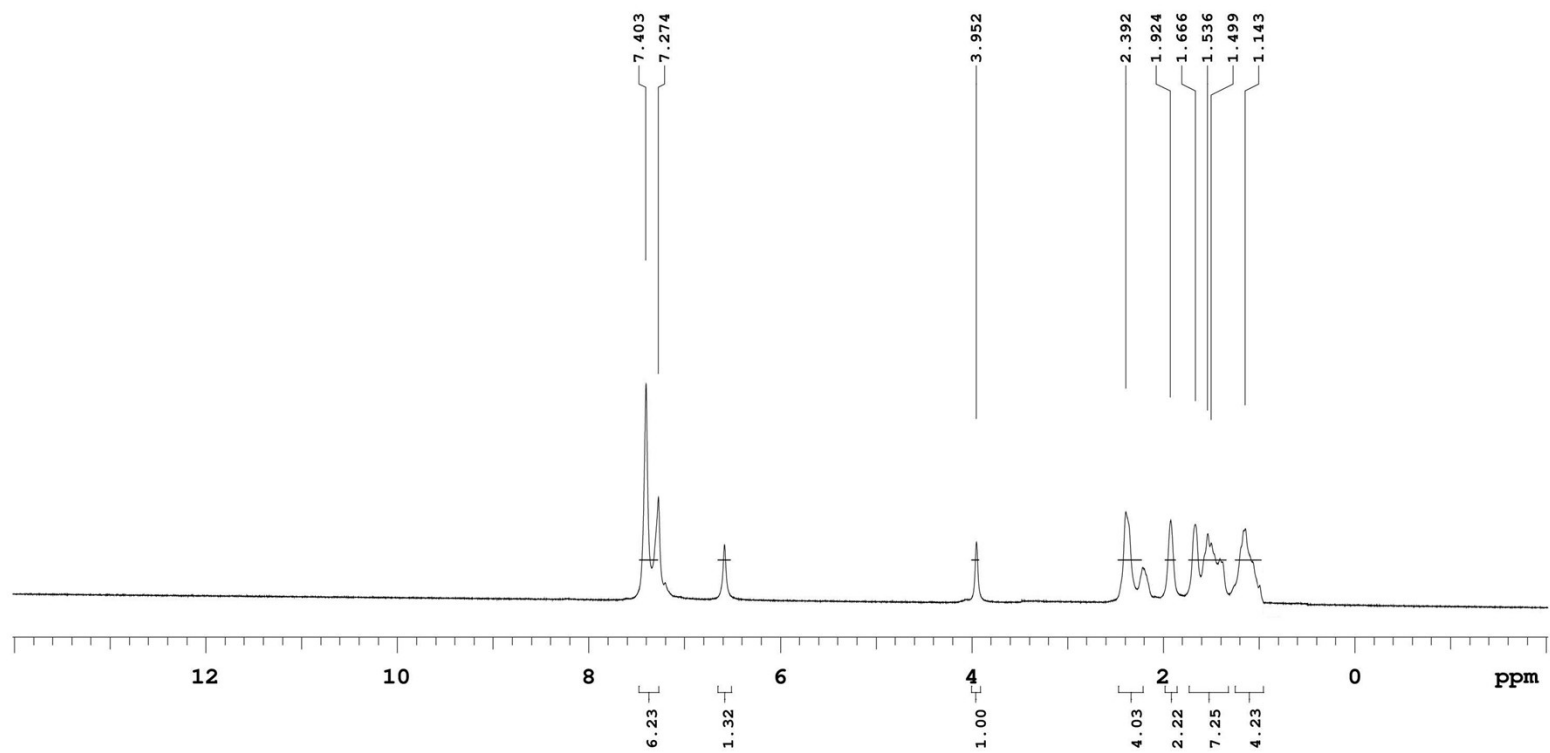



$^{13}\text{C}$  NMR of **3g** in  $\text{CDCl}_3$

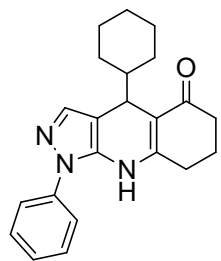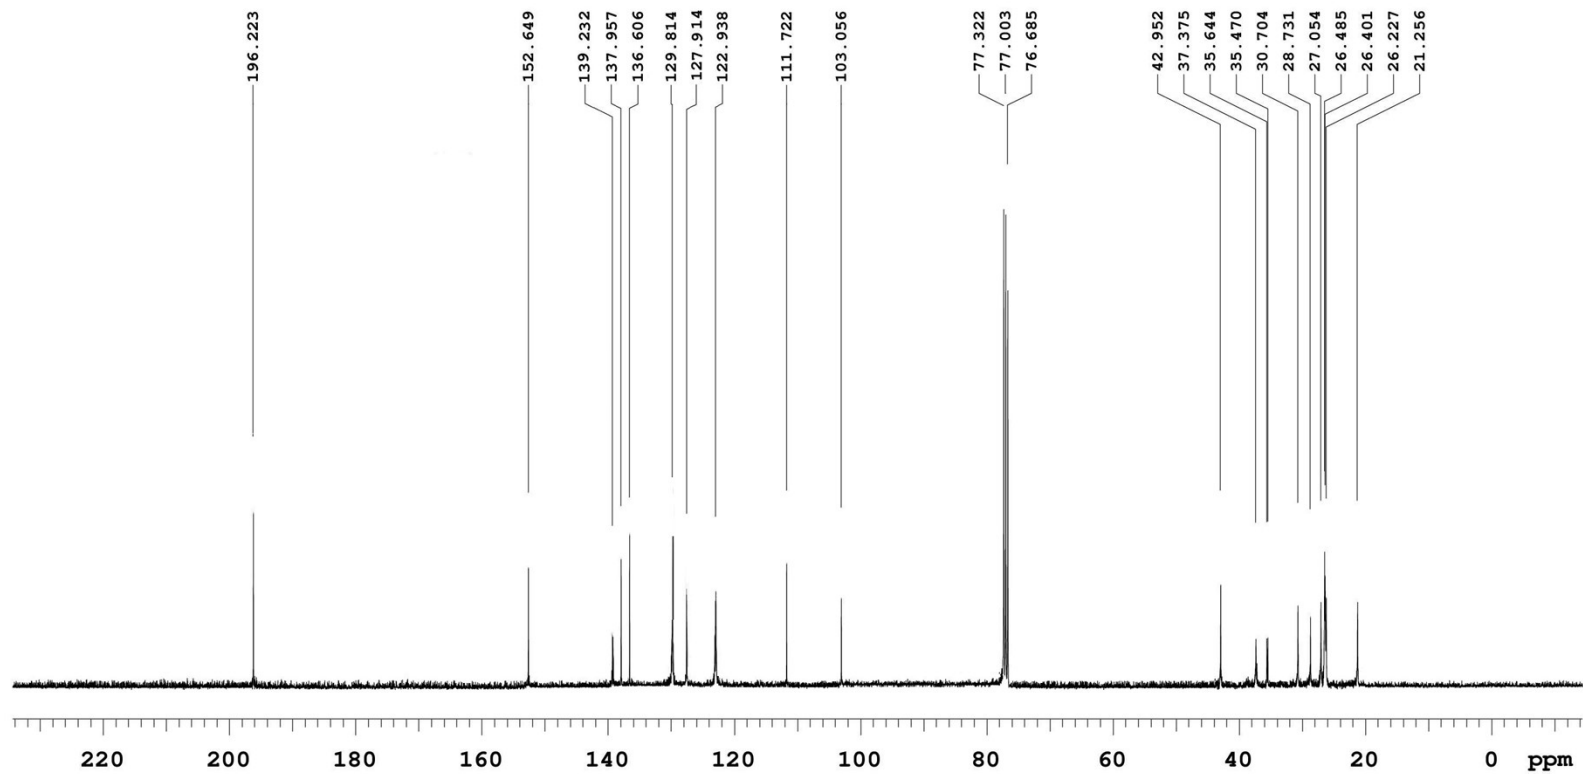

<sup>1</sup>H NMR of **3h** in CDCl<sub>3</sub>

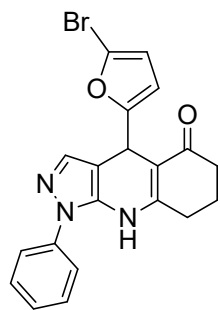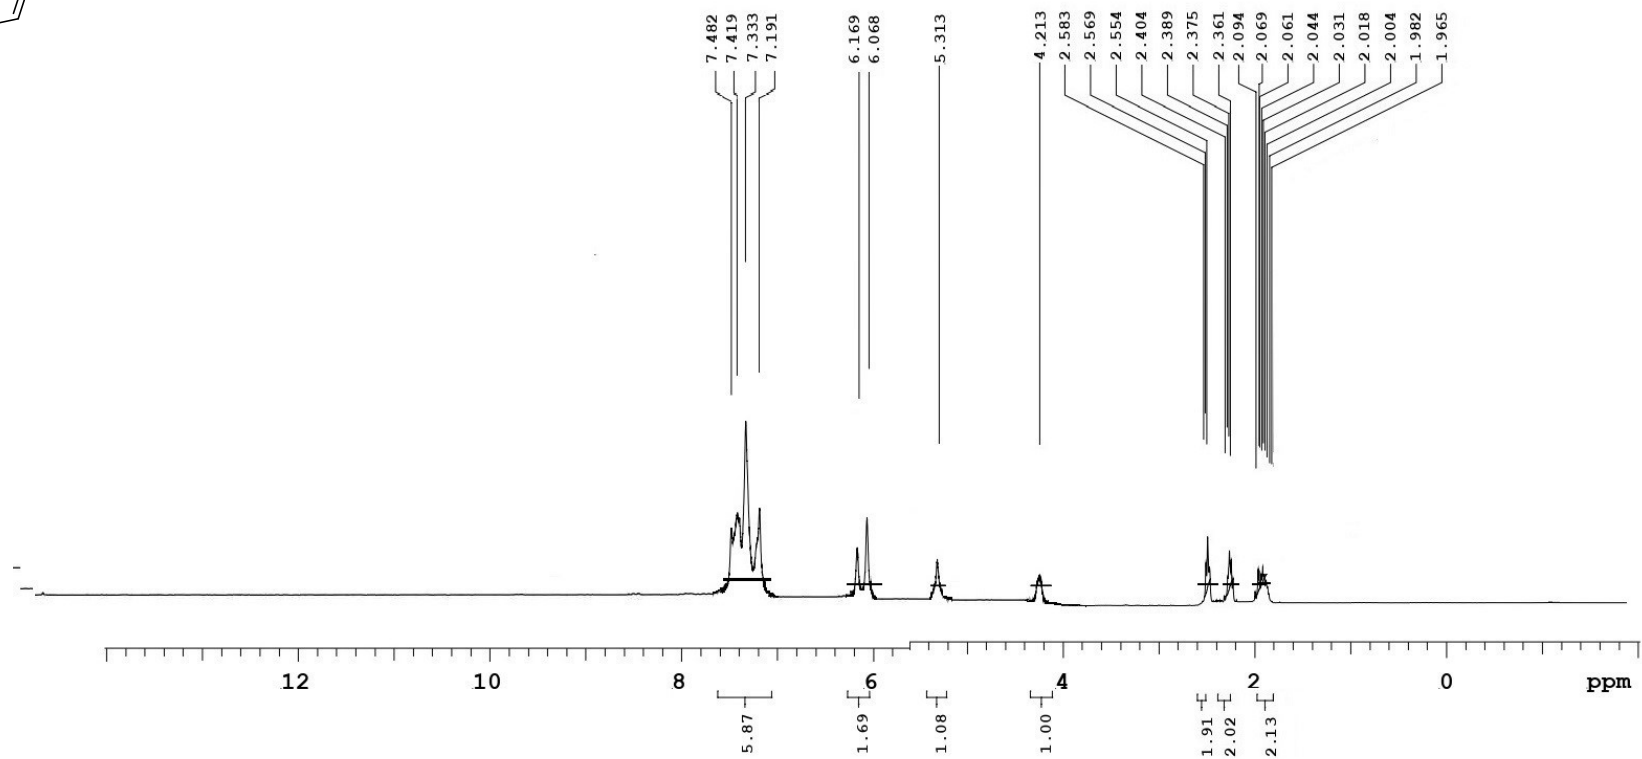

$^{13}\text{C}$  NMR of **3h** in  $\text{CDCl}_3$

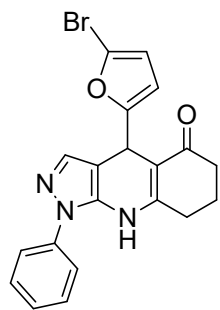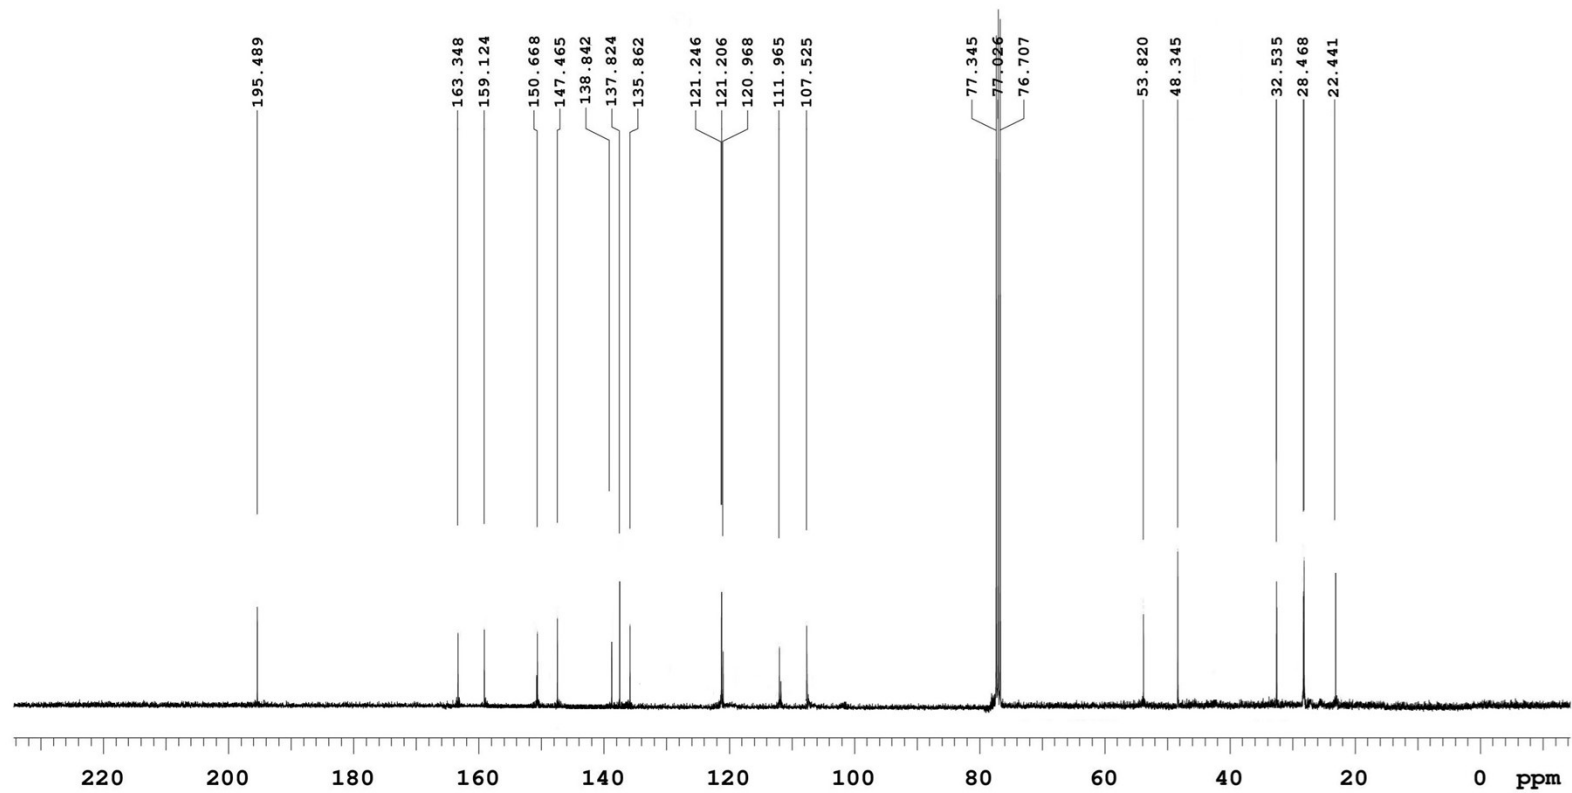

<sup>1</sup>H NMR of **4a** in CDCl<sub>3</sub>

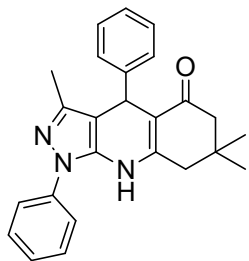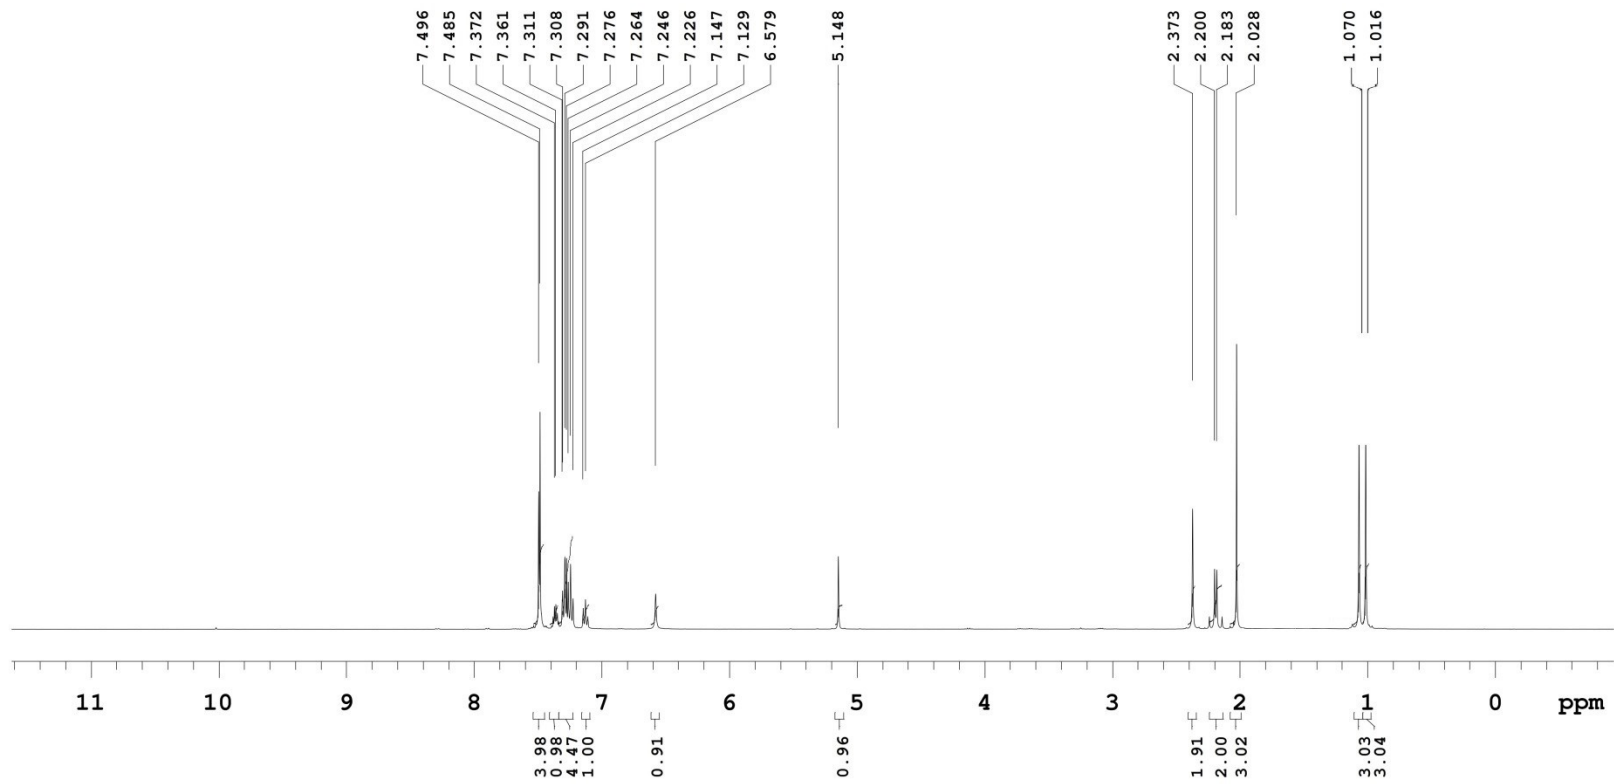

$^{13}\text{C}$  NMR of **4a** in  $\text{CDCl}_3$

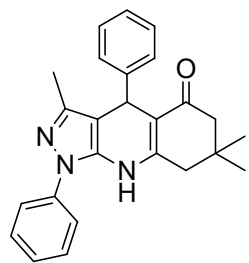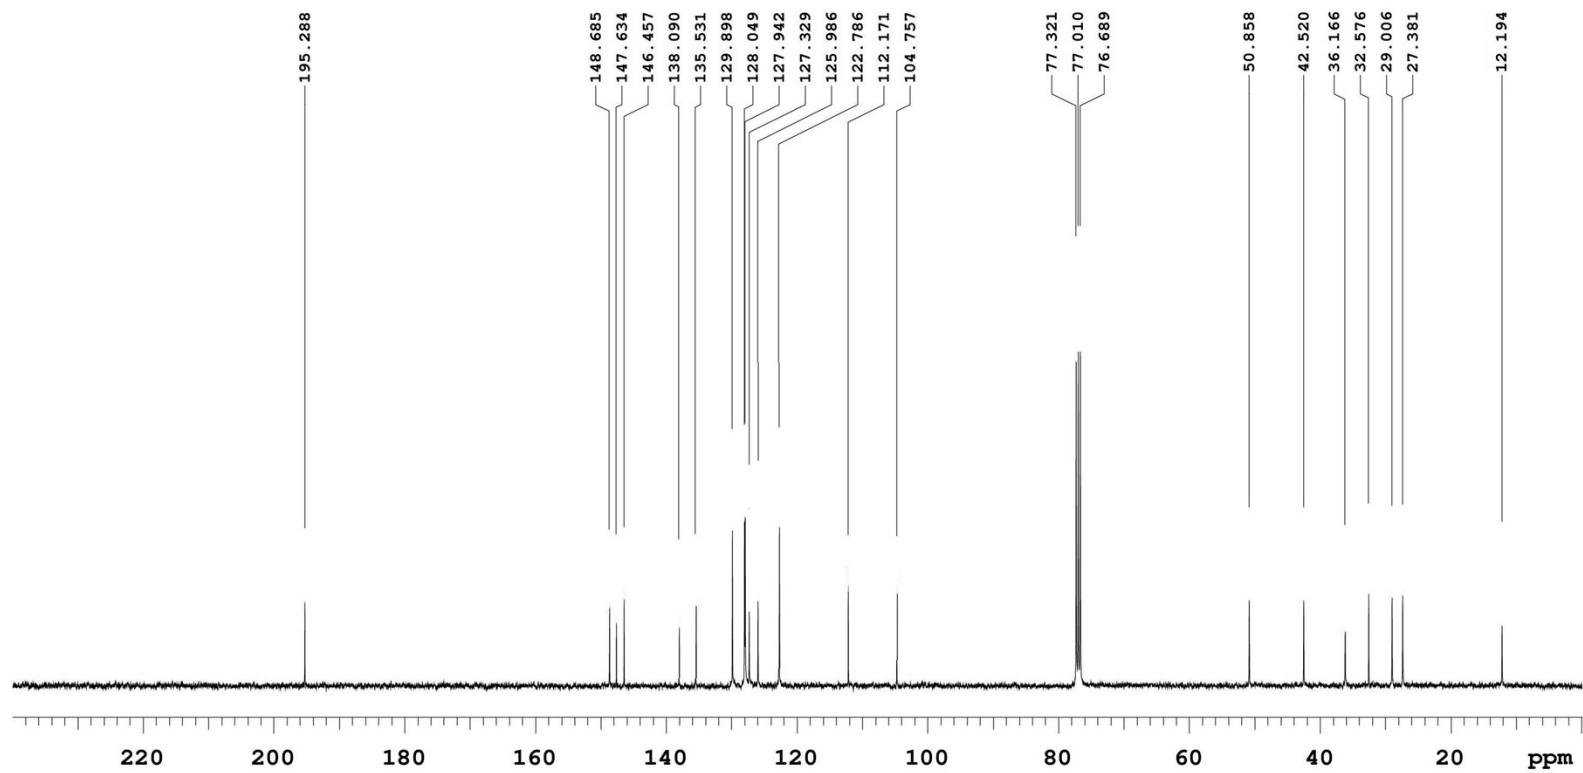

<sup>1</sup>H NMR of **4b** in CDCl<sub>3</sub>

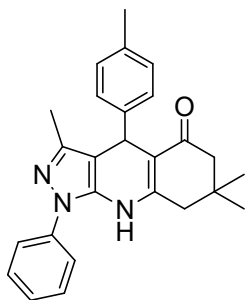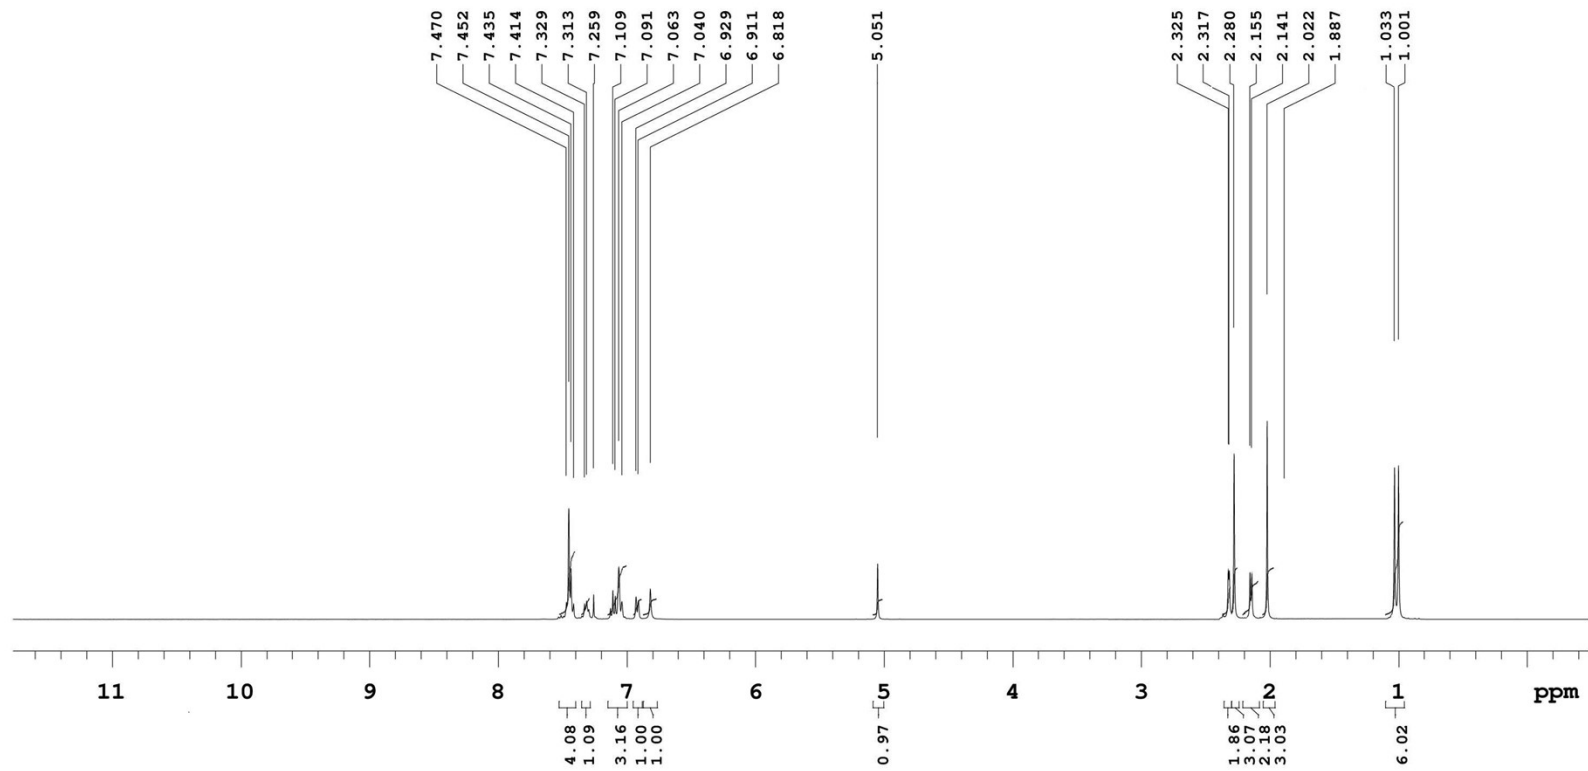

<sup>13</sup>C NMR of **4b** in CDCl<sub>3</sub>

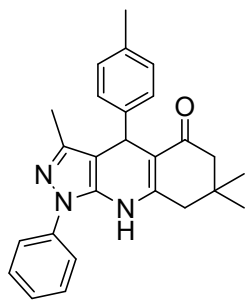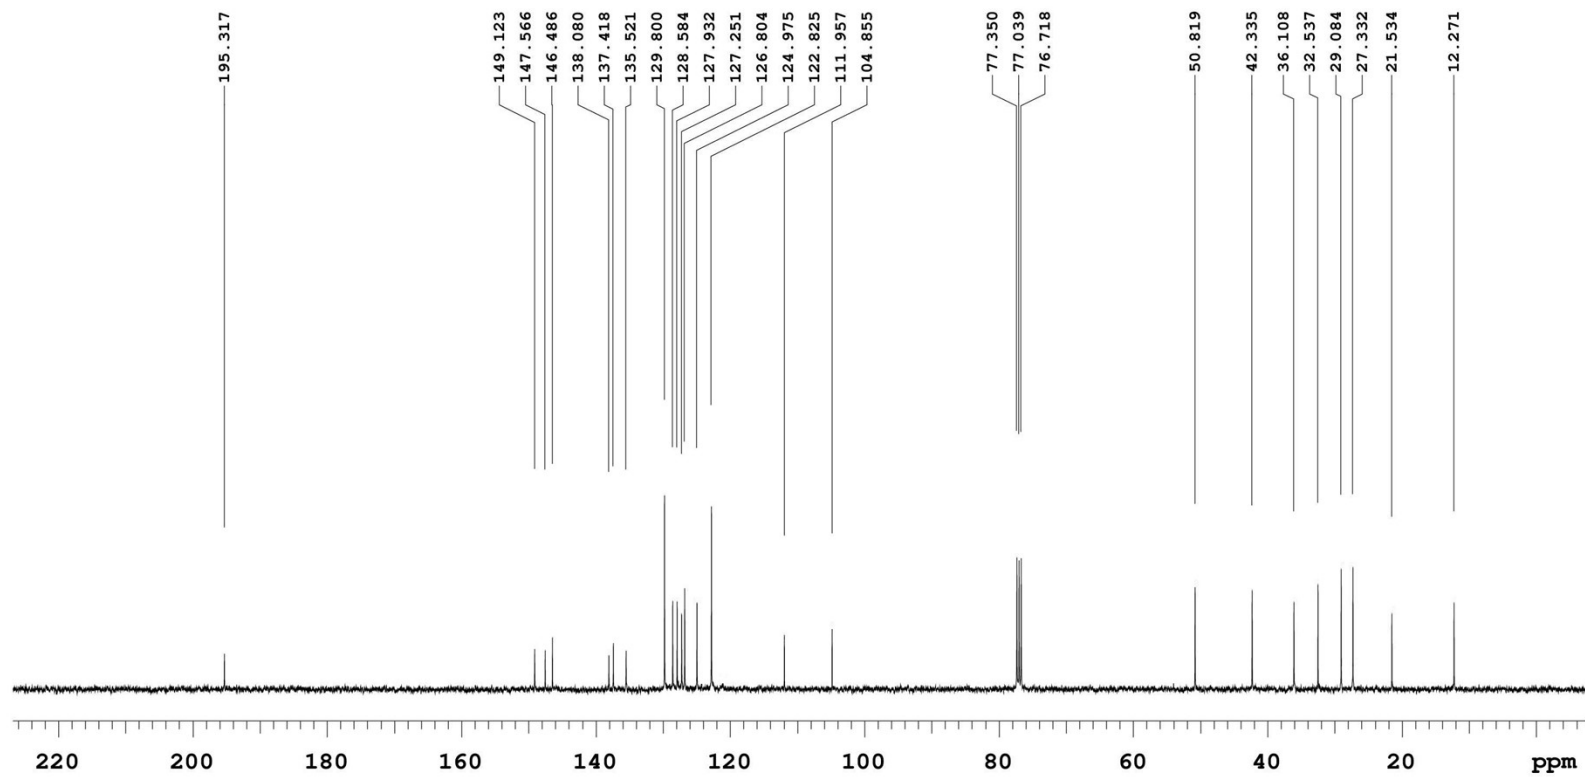

<sup>1</sup>H NMR of **4c** in CDCl<sub>3</sub>

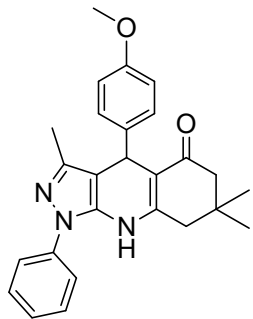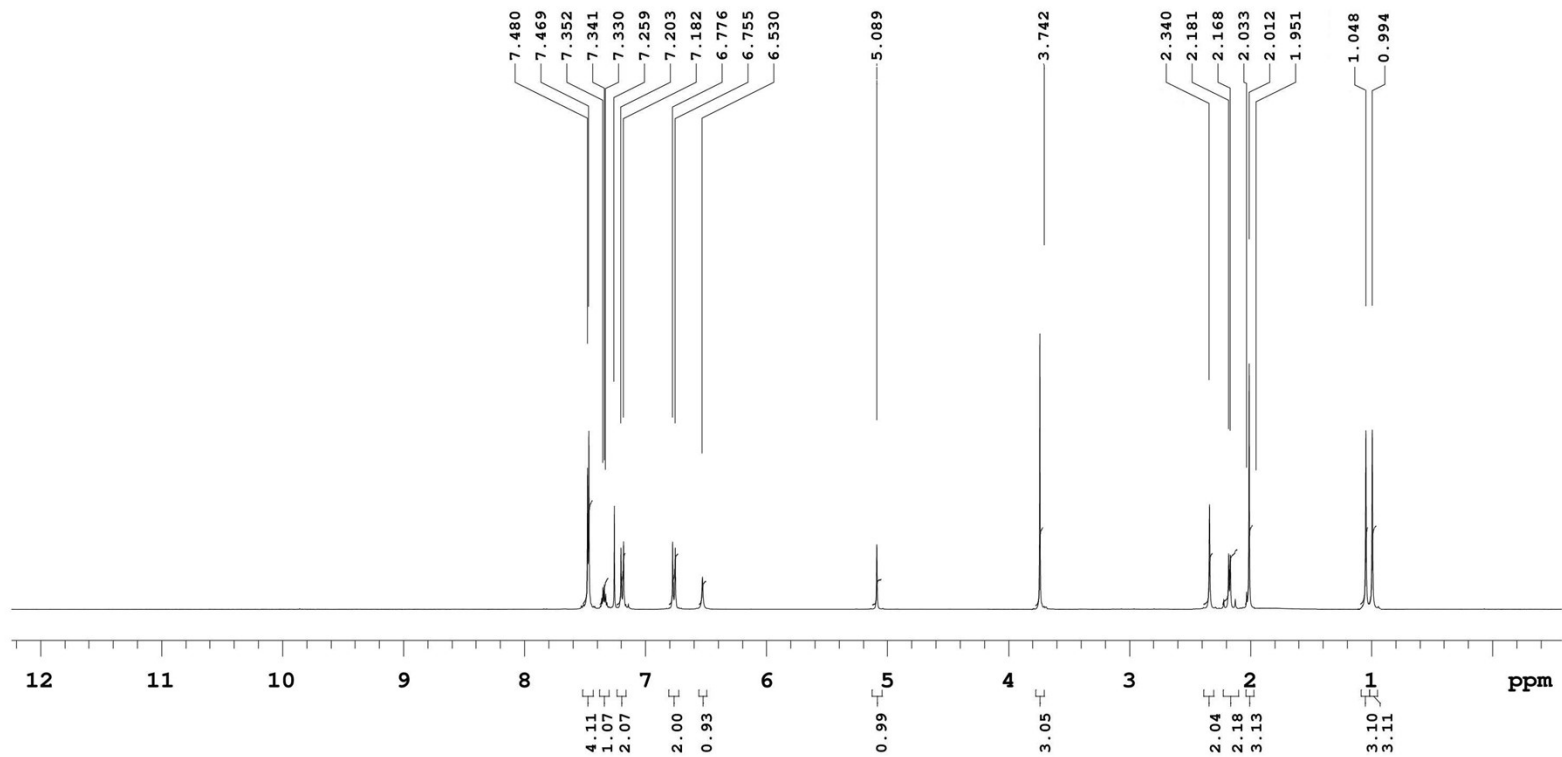



$^{13}\text{C}$  NMR of **4c** in  $\text{CDCl}_3$

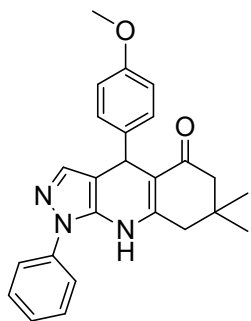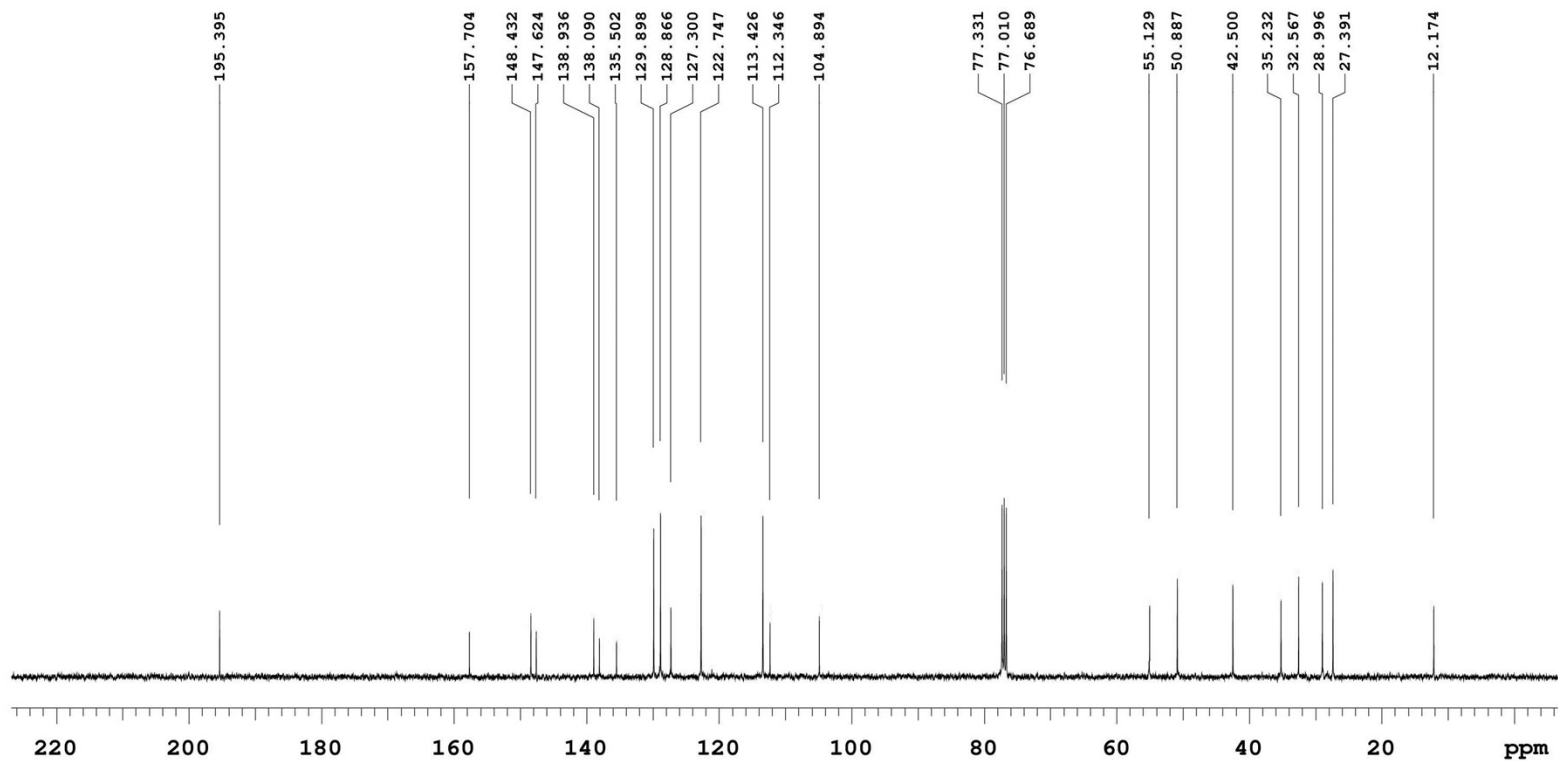

$^1\text{H}$  NMR of **4d** in  $\text{CDCl}_3$

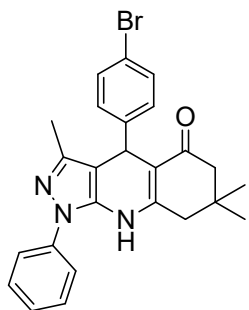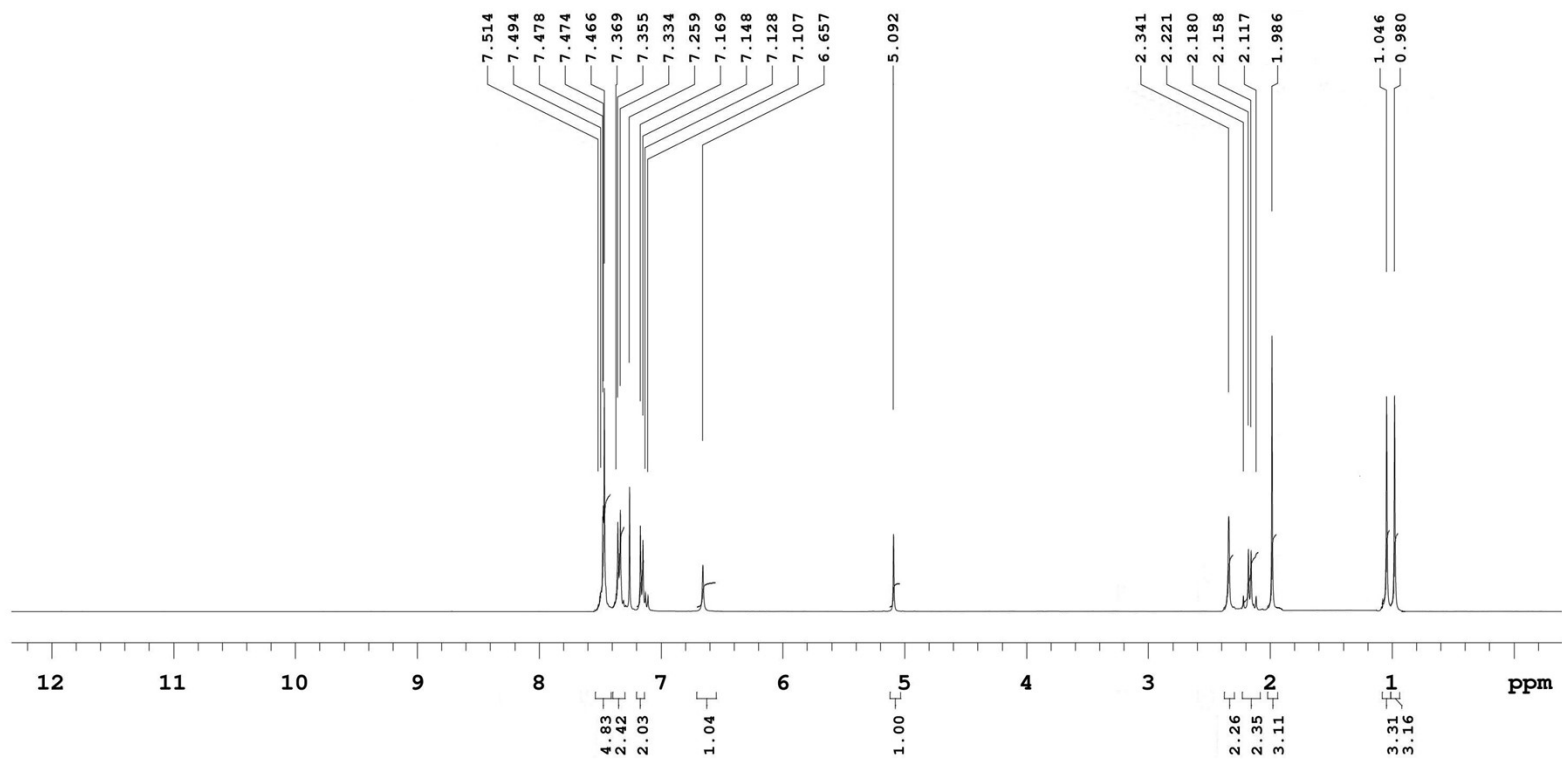

$^{13}\text{C}$  NMR of **4d** in  $\text{CDCl}_3$

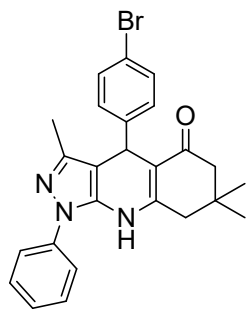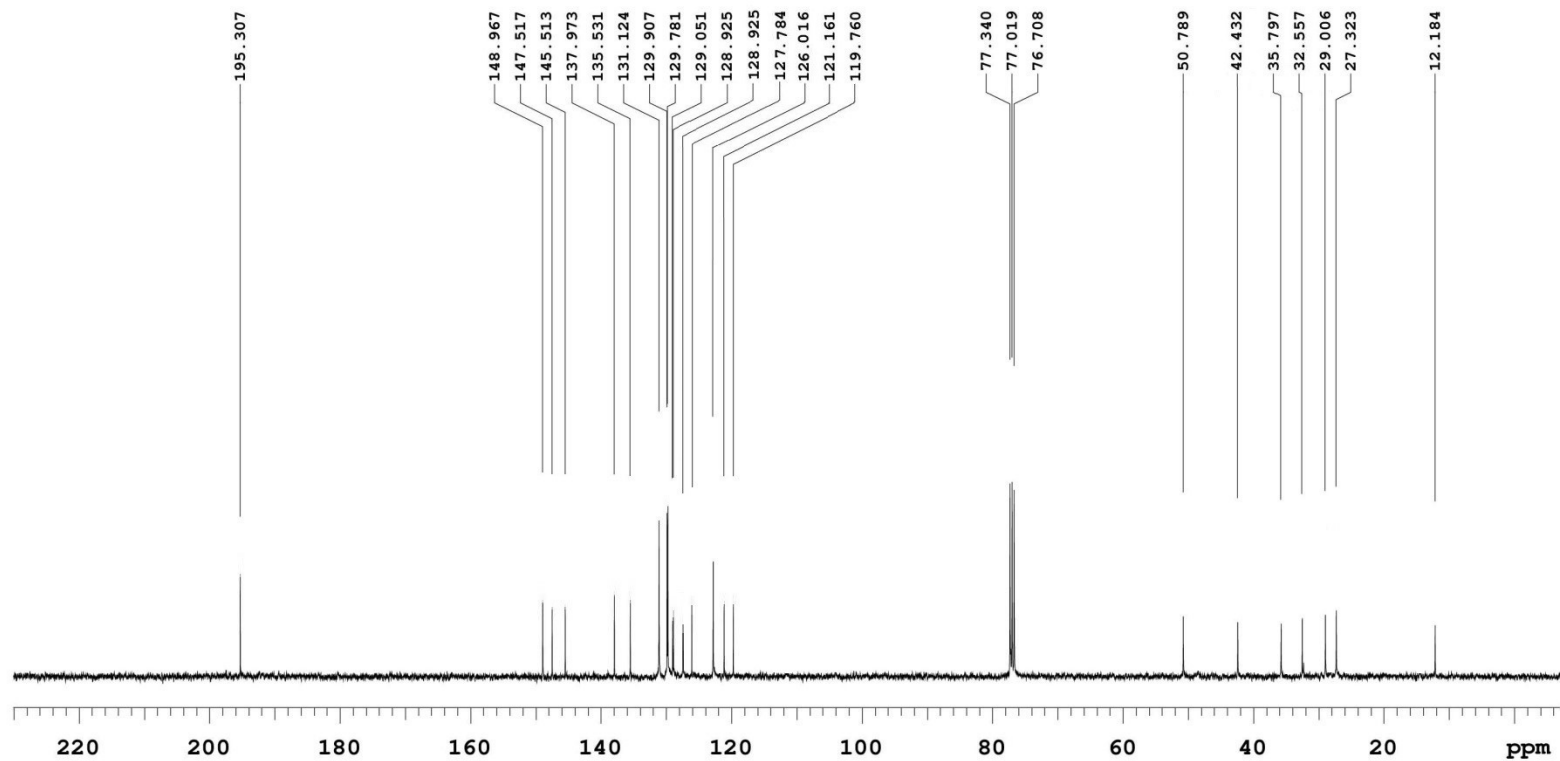

<sup>1</sup>H NMR of **4e** in CDCl<sub>3</sub>

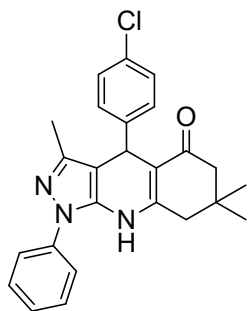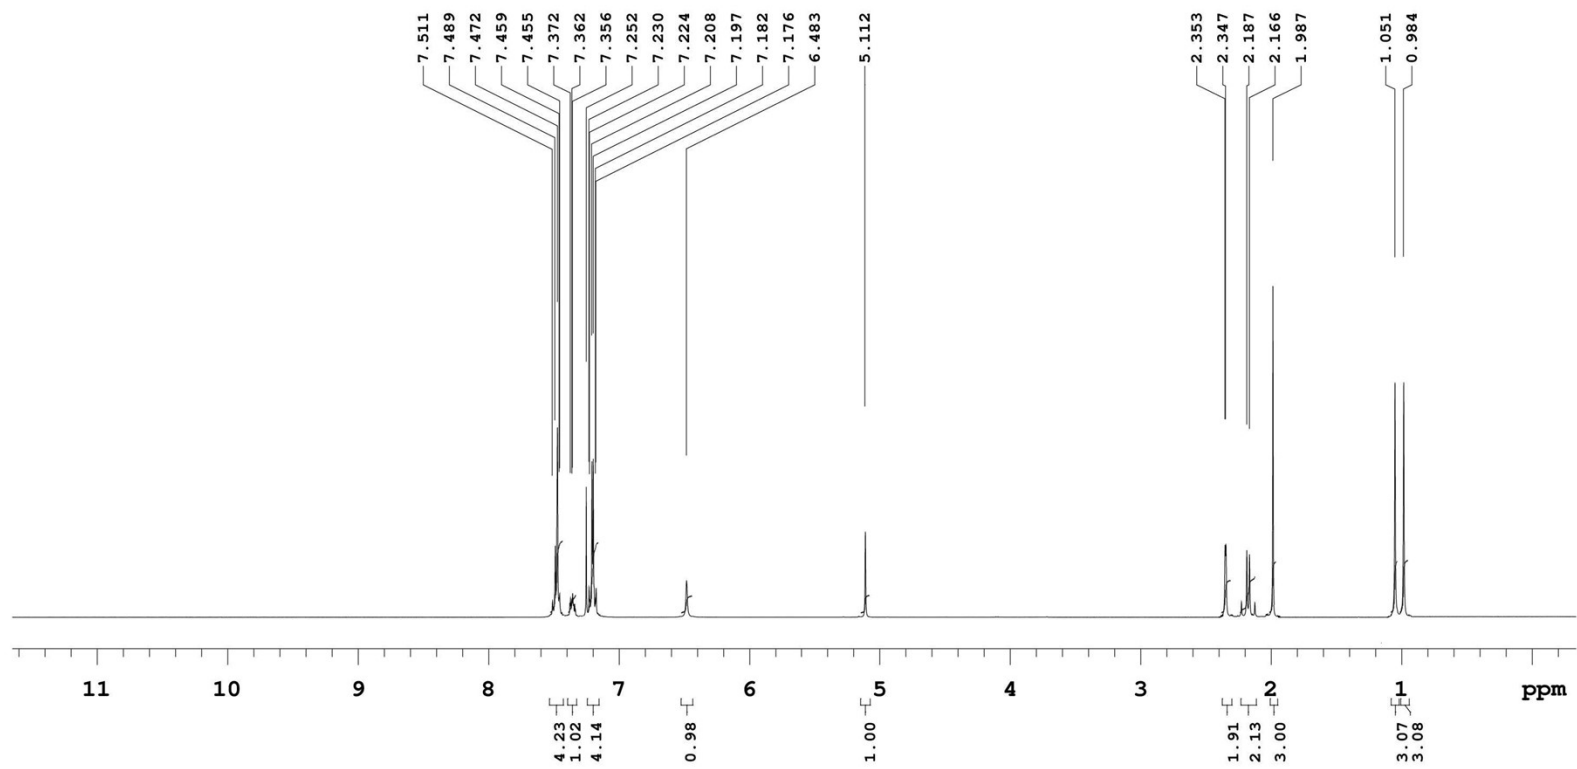

$^{13}\text{C}$  NMR of **4e** in  $\text{CDCl}_3$

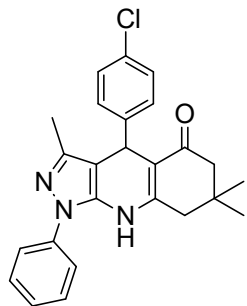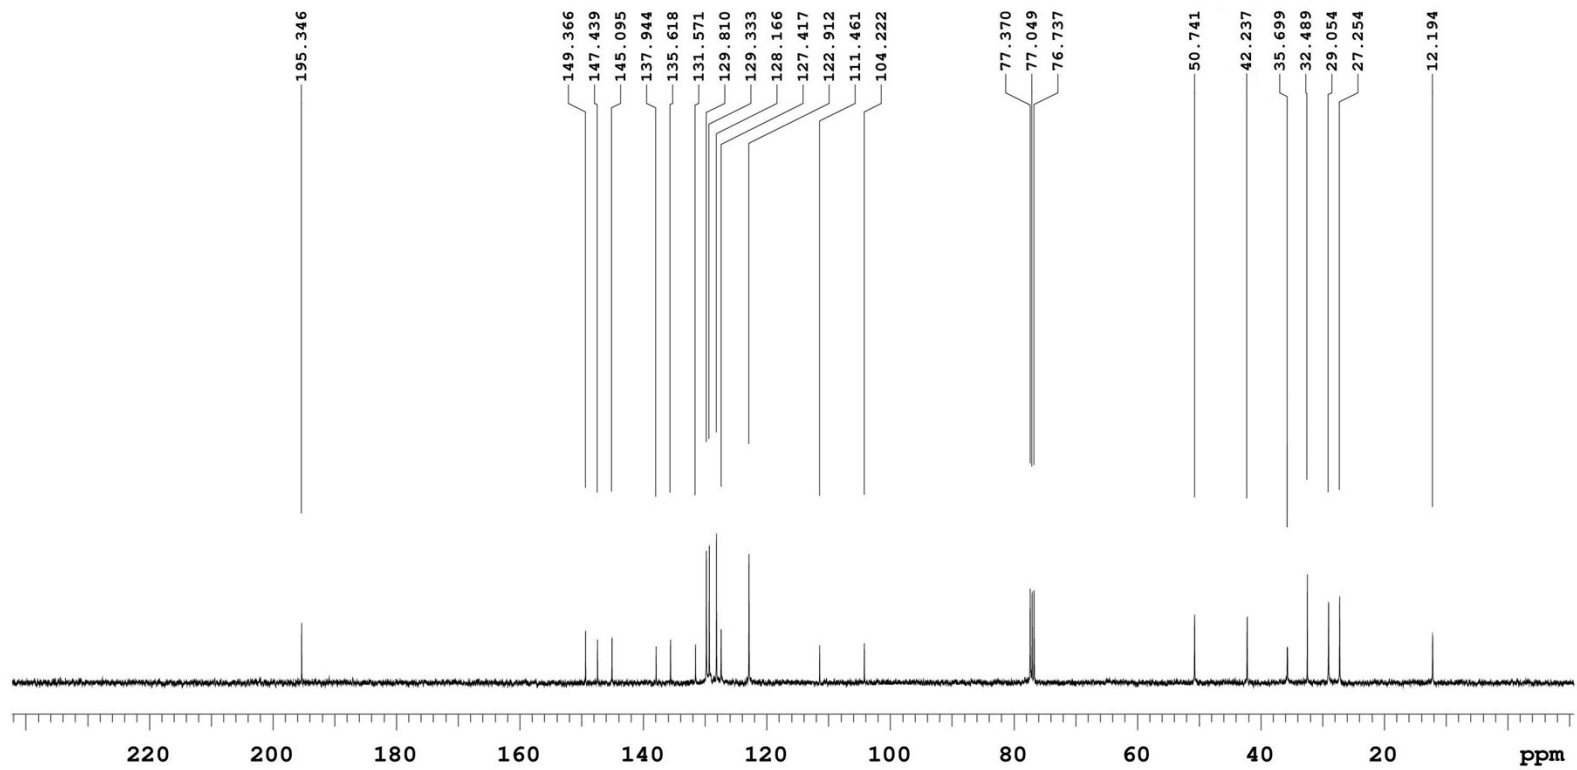

<sup>1</sup>H NMR of **4f** in CDCl<sub>3</sub>

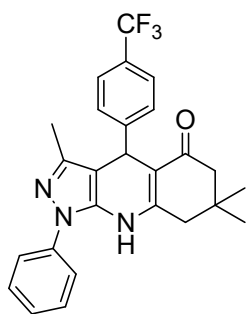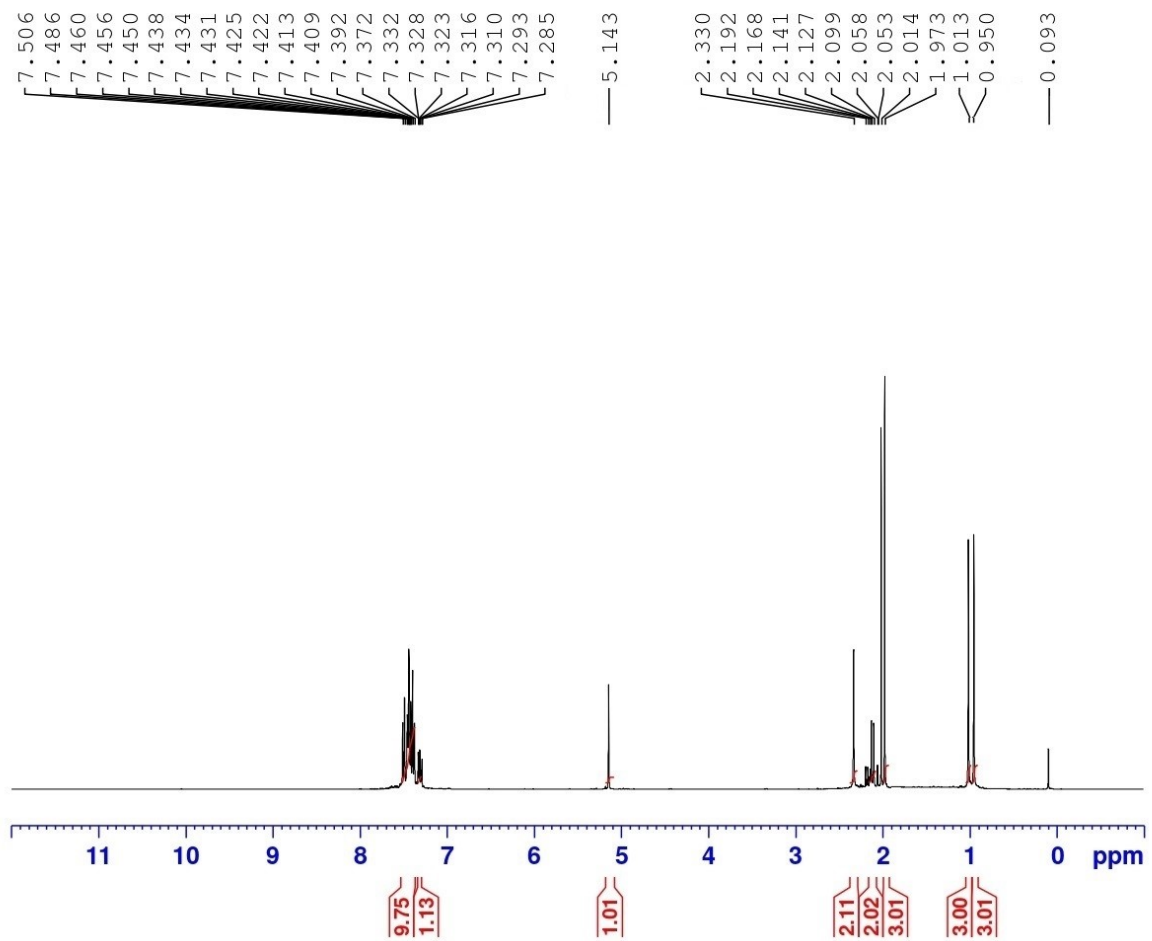

$^{13}\text{C}$  NMR of **4f** in  $\text{CDCl}_3$

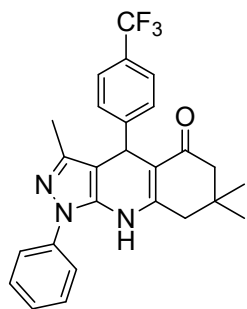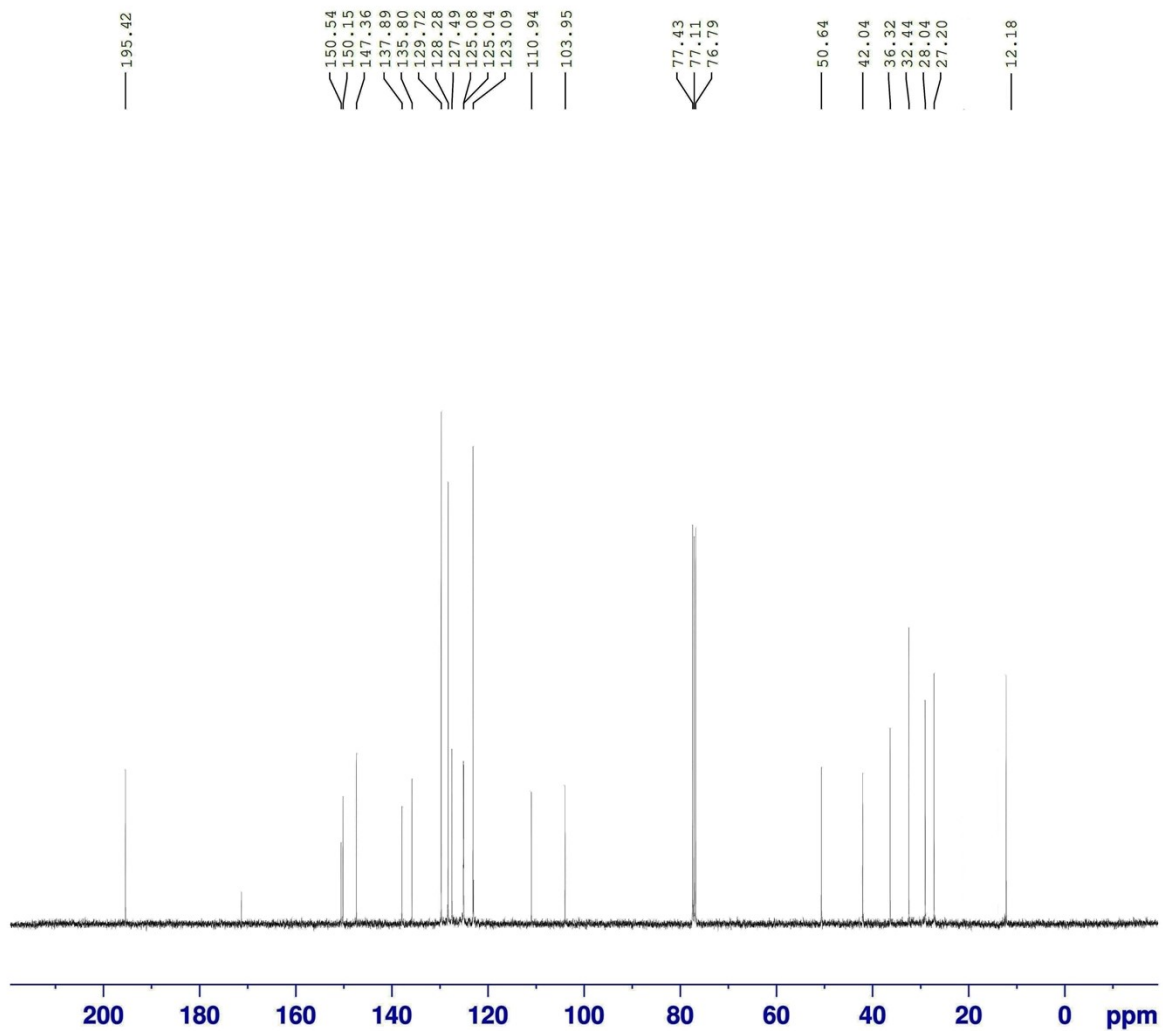

$^{19}\text{F}$  NMR of **4e** in  $\text{CDCl}_3$

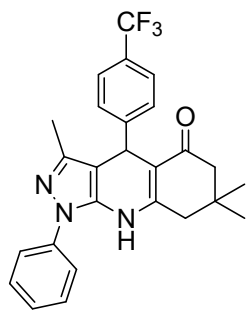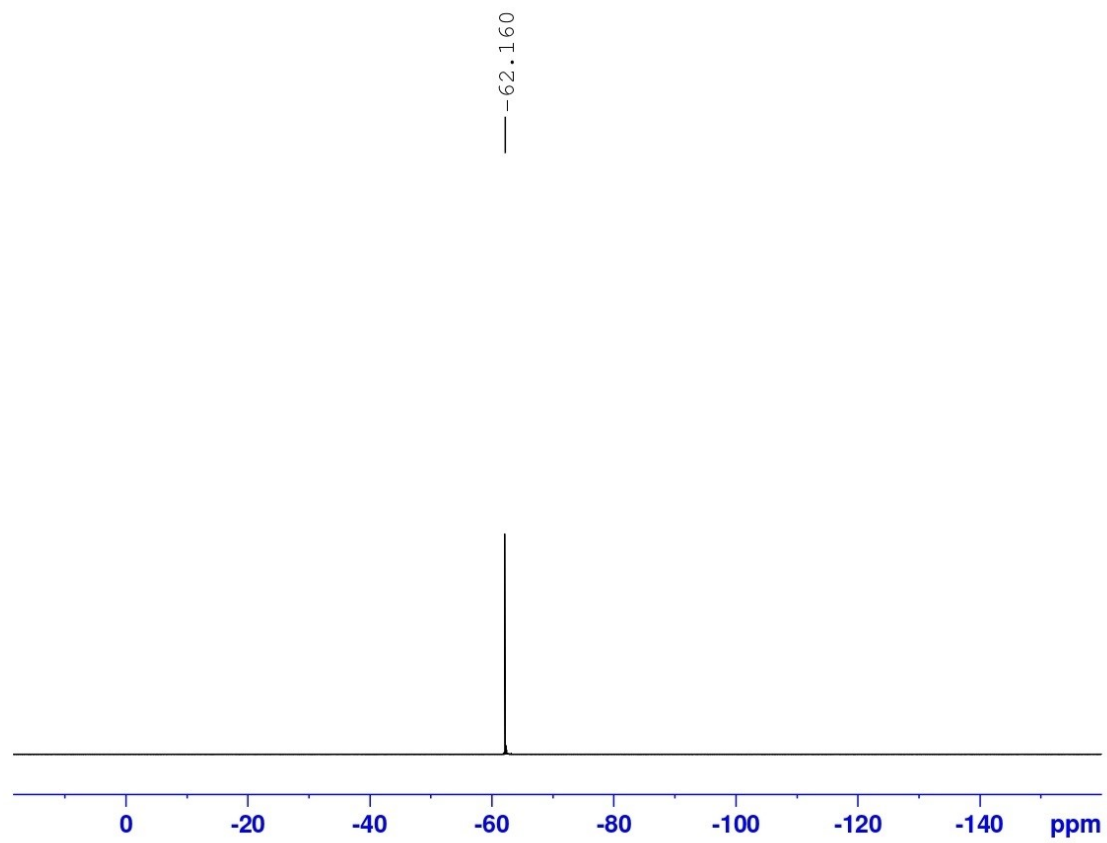



<sup>1</sup>H NMR of **4g** in DMSO-d<sub>6</sub>

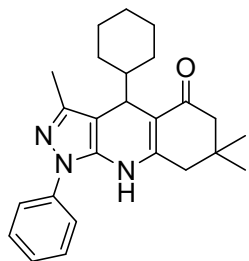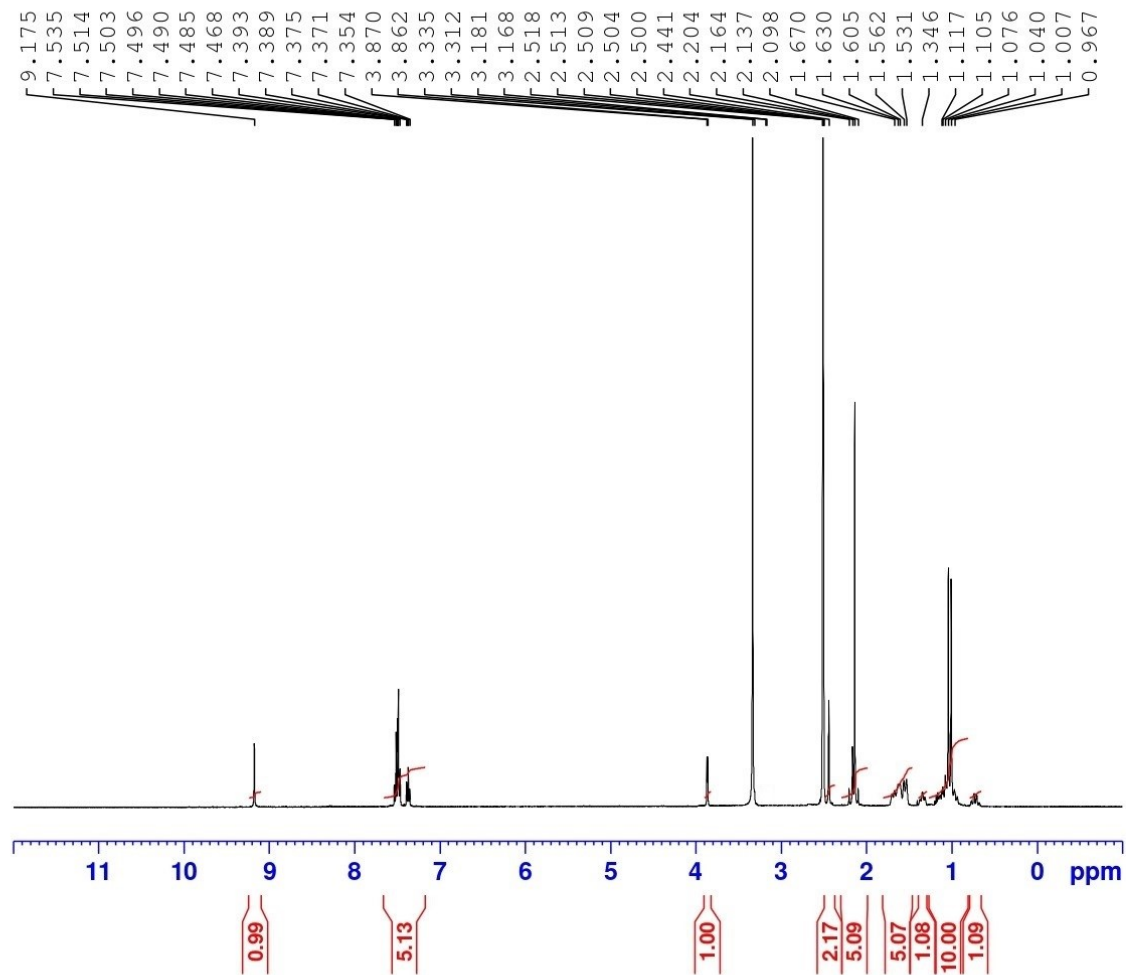

$^{13}\text{C}$  NMR of **4g** in  $\text{CDCl}_3$

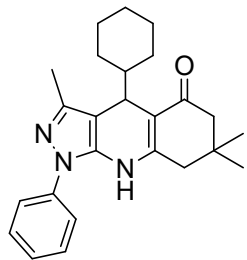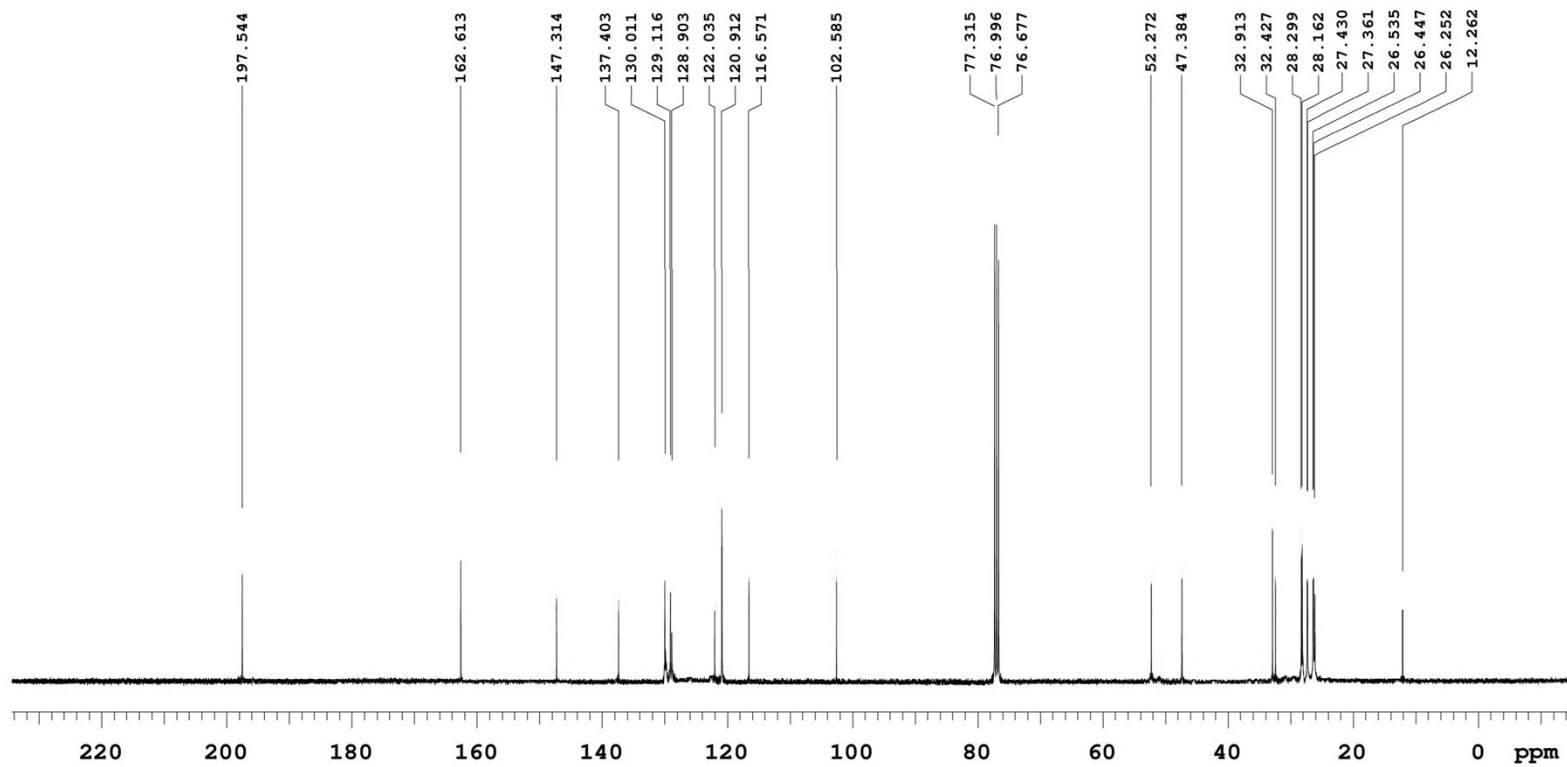

<sup>1</sup>H NMR of **4h** in DMSO-d<sub>6</sub>

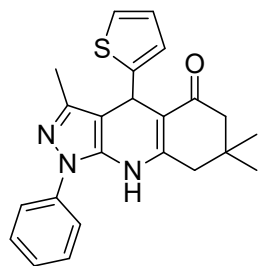

9.546  
7.553  
7.532  
7.515  
7.495  
7.414  
7.397  
7.381  
7.215  
7.204  
6.867  
6.859  
6.846  
6.825  
6.819  
5.377  
2.549  
2.508  
2.235  
2.194  
2.102  
2.061  
2.047  
1.975  
1.018  
0.983

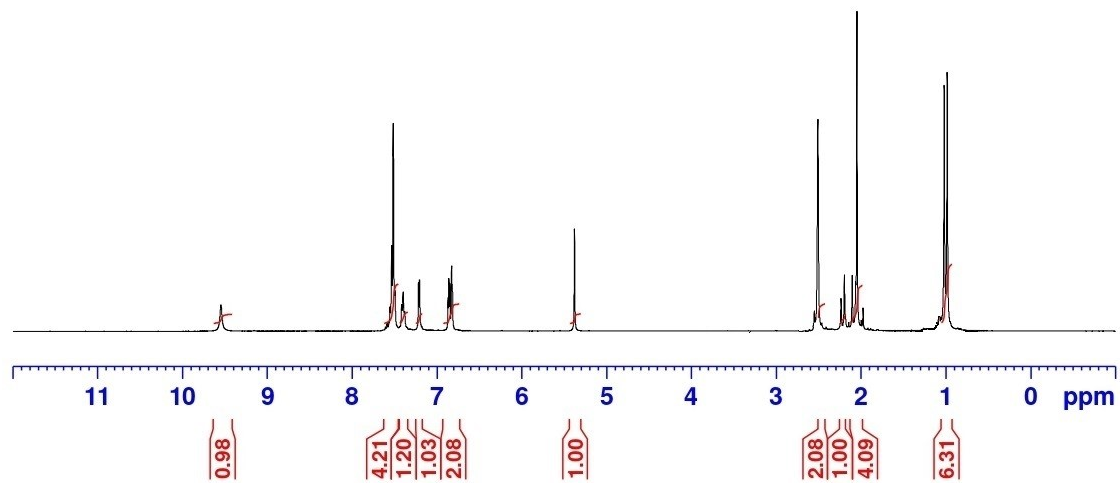

$^{13}\text{C}$  NMR of **4h** in  $\text{CDCl}_3$

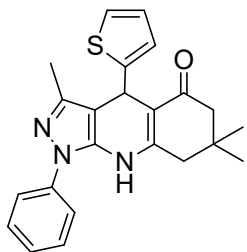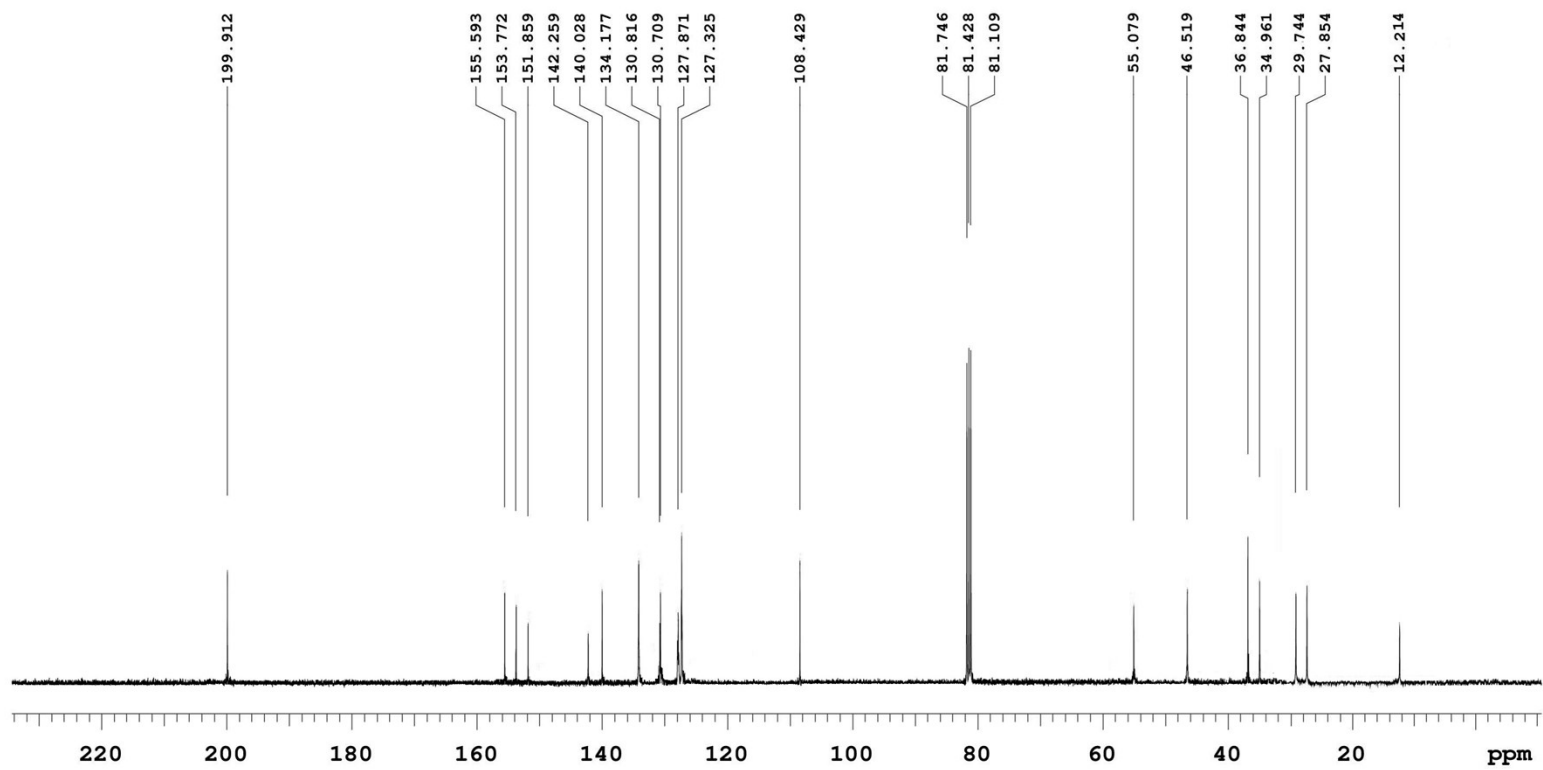

<sup>1</sup>H NMR of **4i** in CDCl<sub>3</sub>

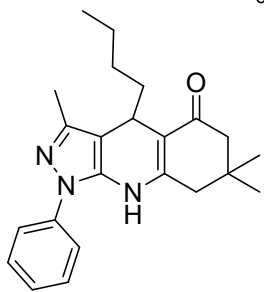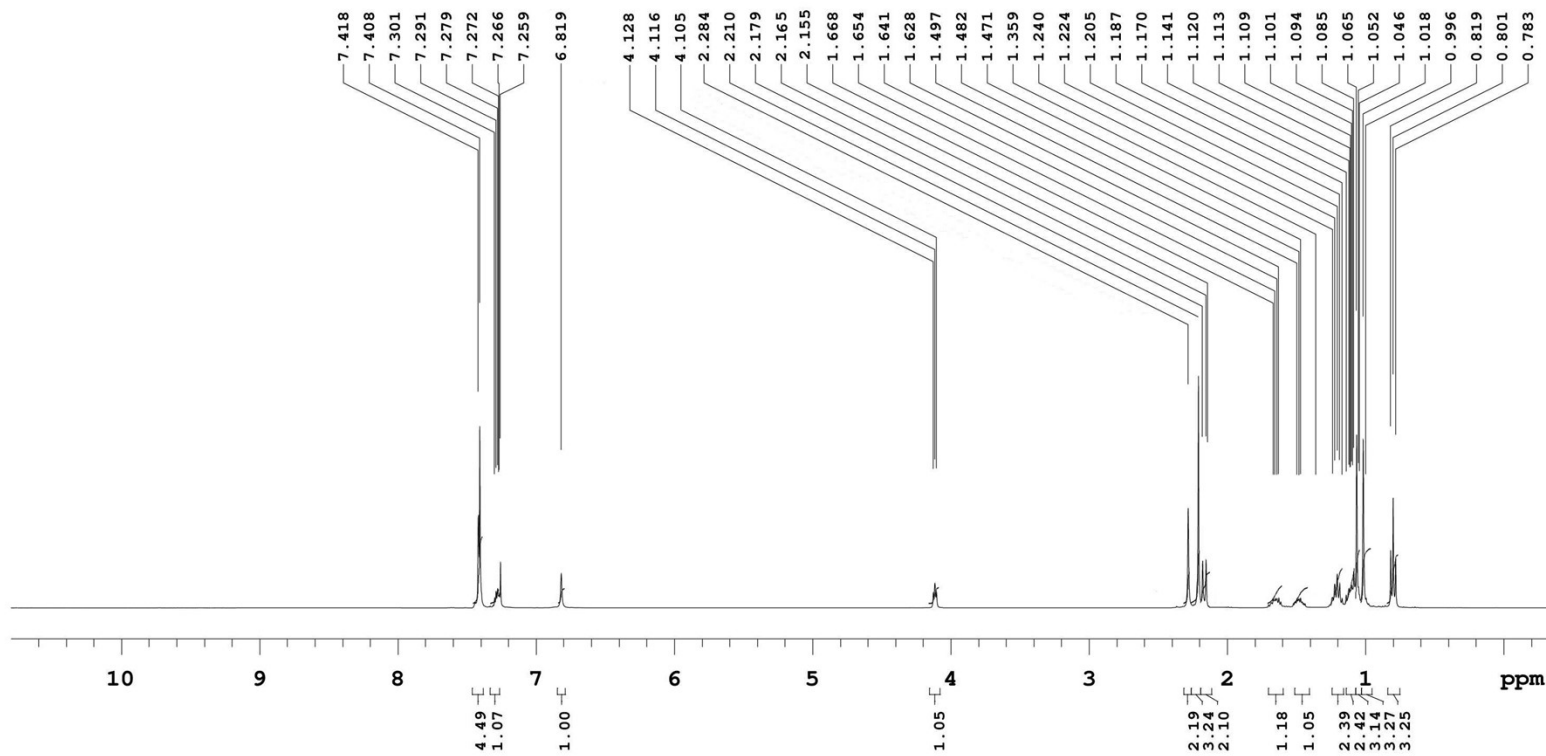

$^{13}\text{C}$  NMR of **4i** in  $\text{CDCl}_3$

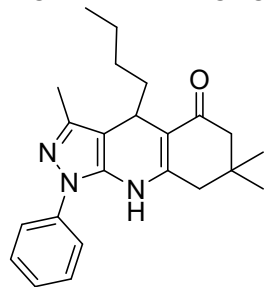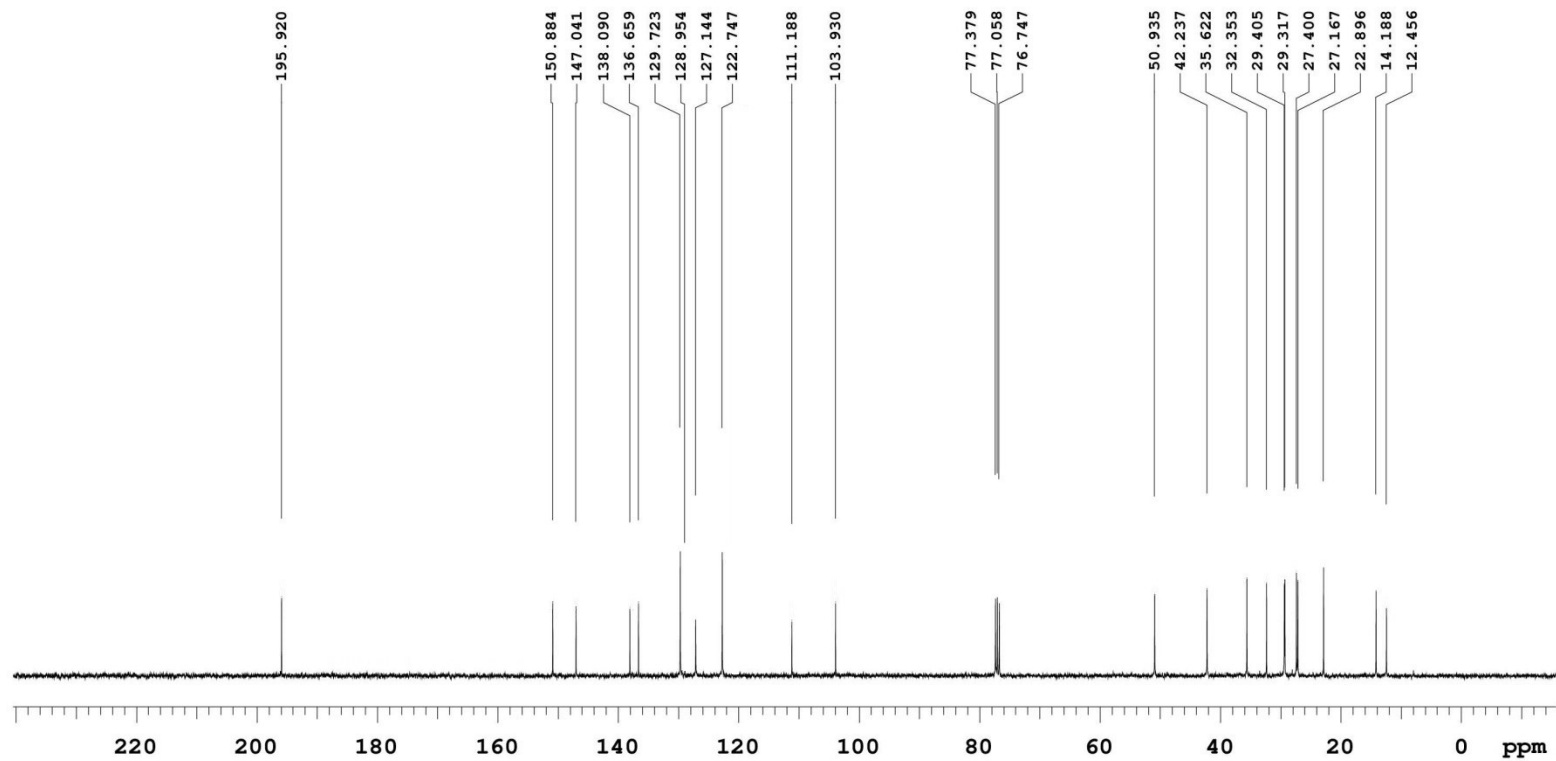

<sup>1</sup>H NMR of **4j** in CDCl<sub>3</sub>

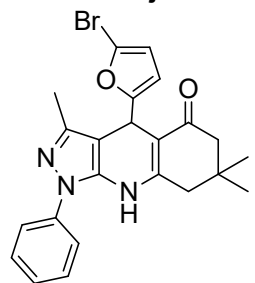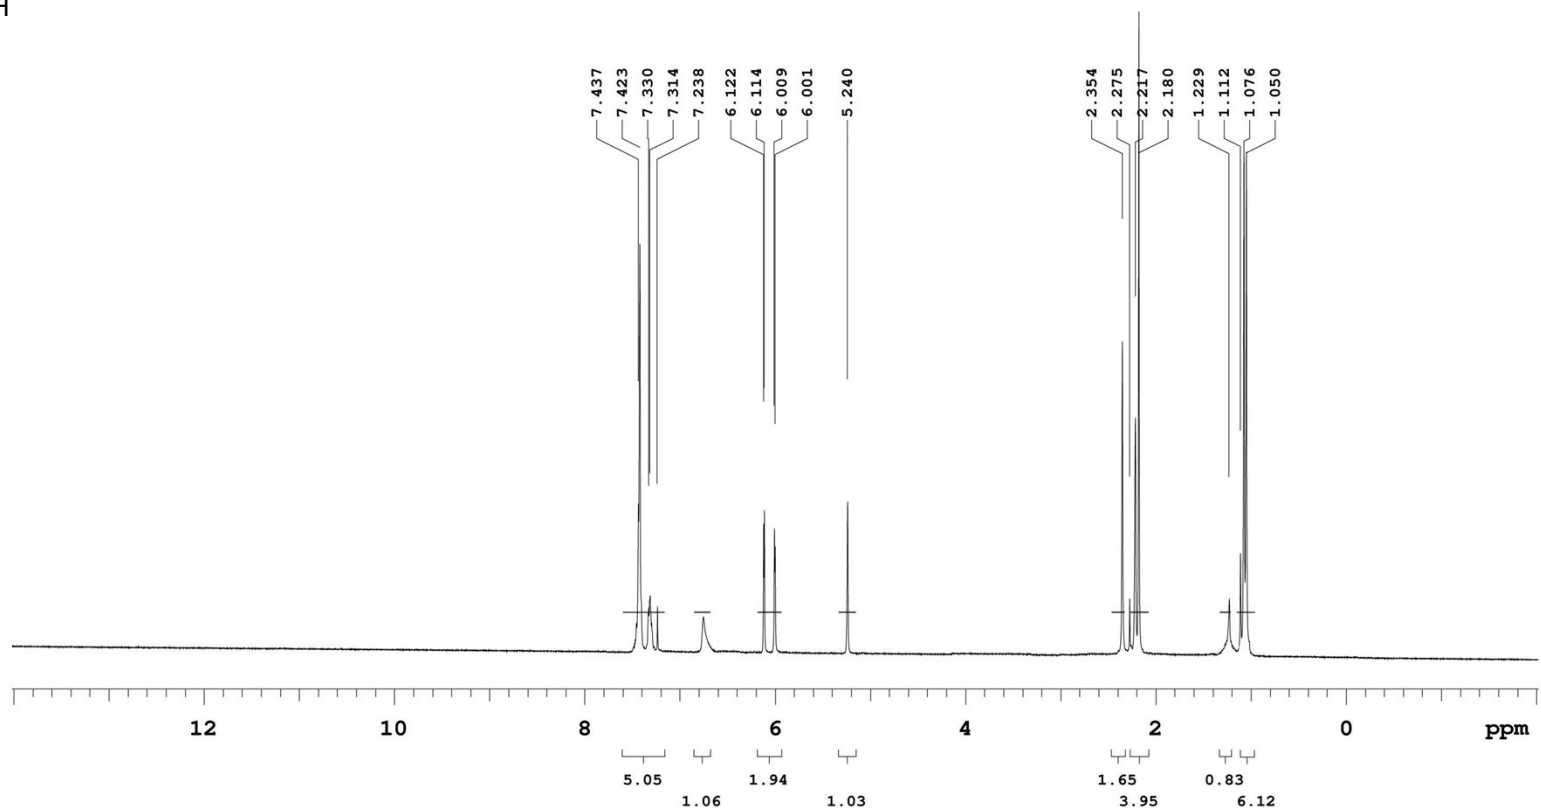

<sup>13</sup>C NMR of **4j** in CDCl<sub>3</sub>

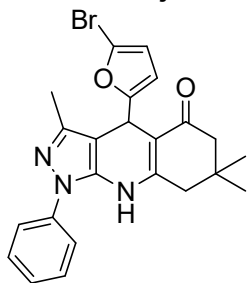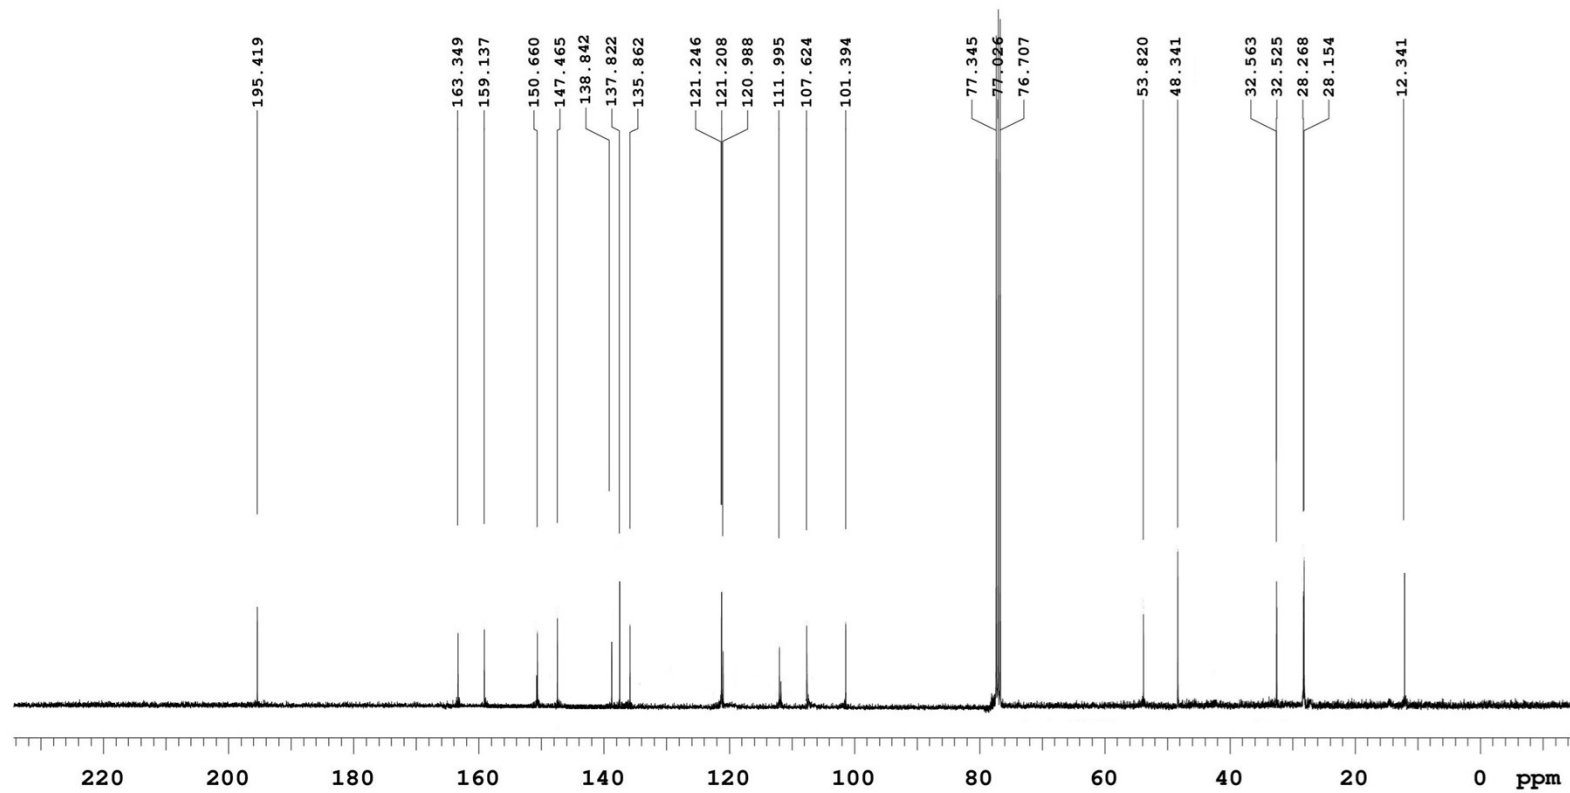



<sup>1</sup>H NMR of **5a** in CDCl<sub>3</sub>

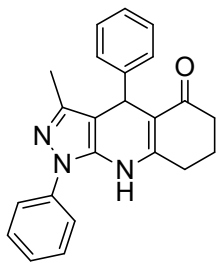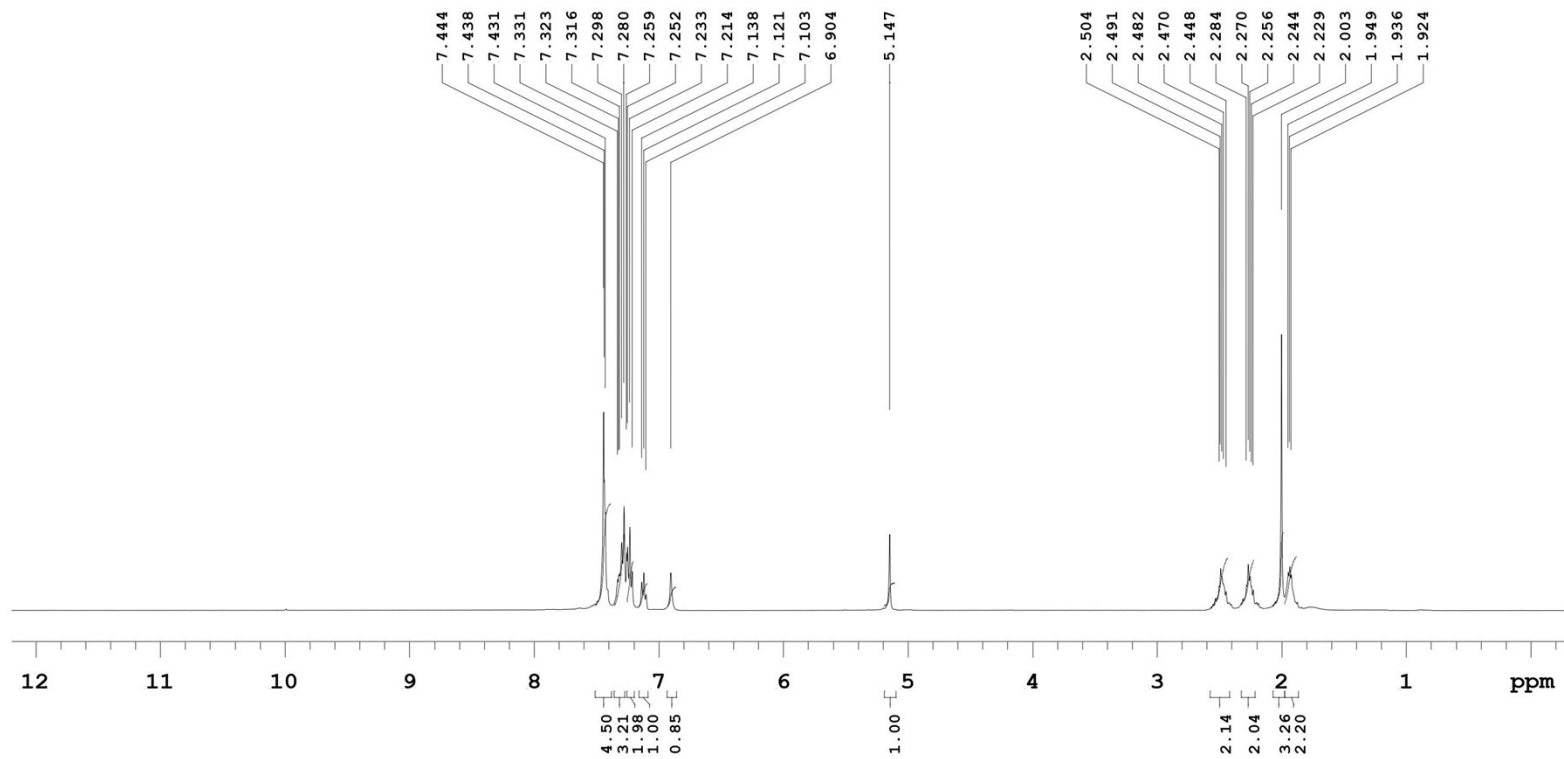

$^{13}\text{C}$  NMR of **5a** in  $\text{CDCl}_3$

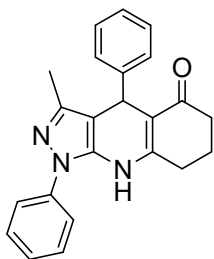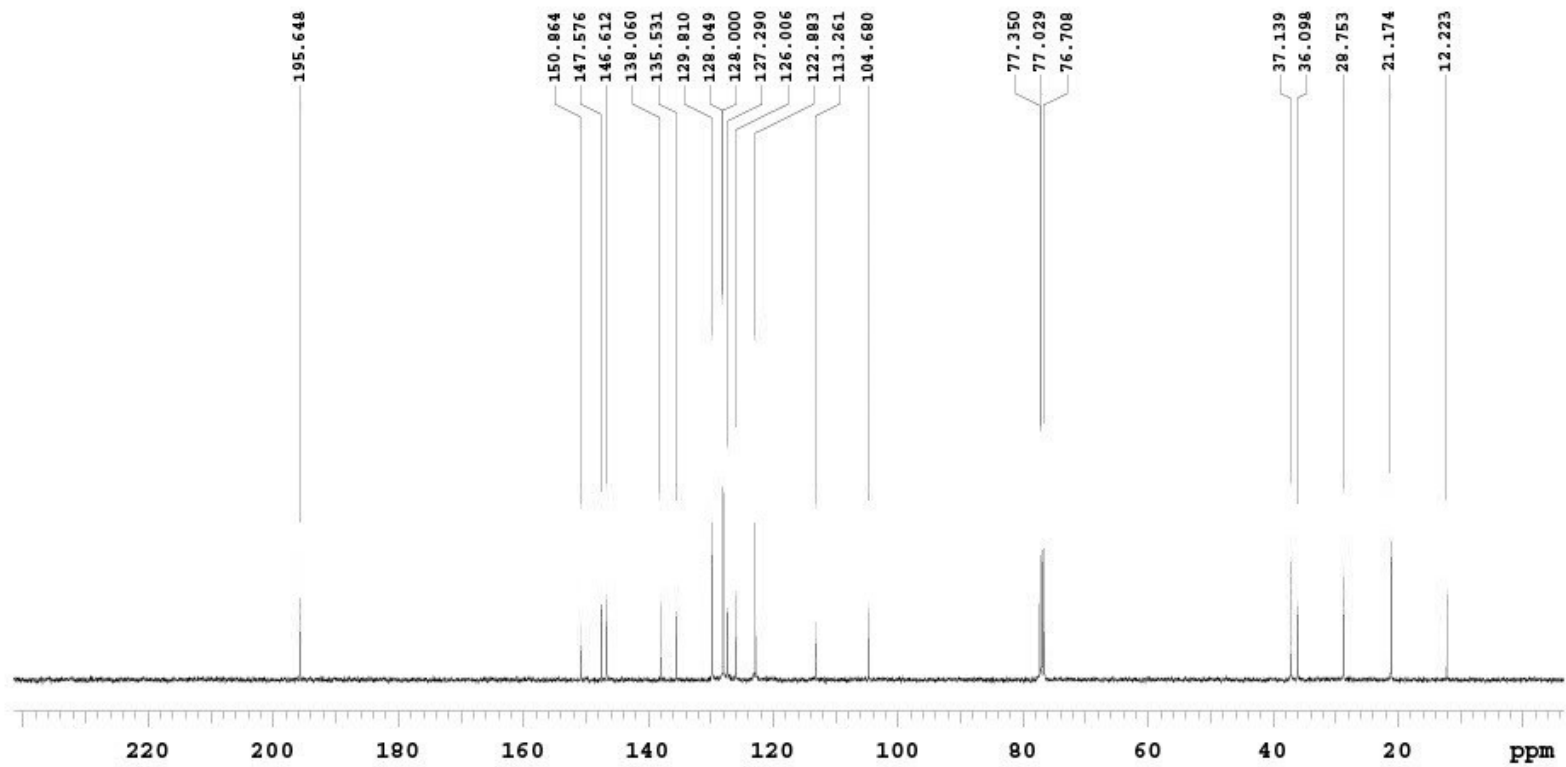

$^1\text{H}$  NMR of **5b** in  $\text{CDCl}_3$

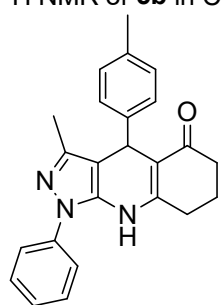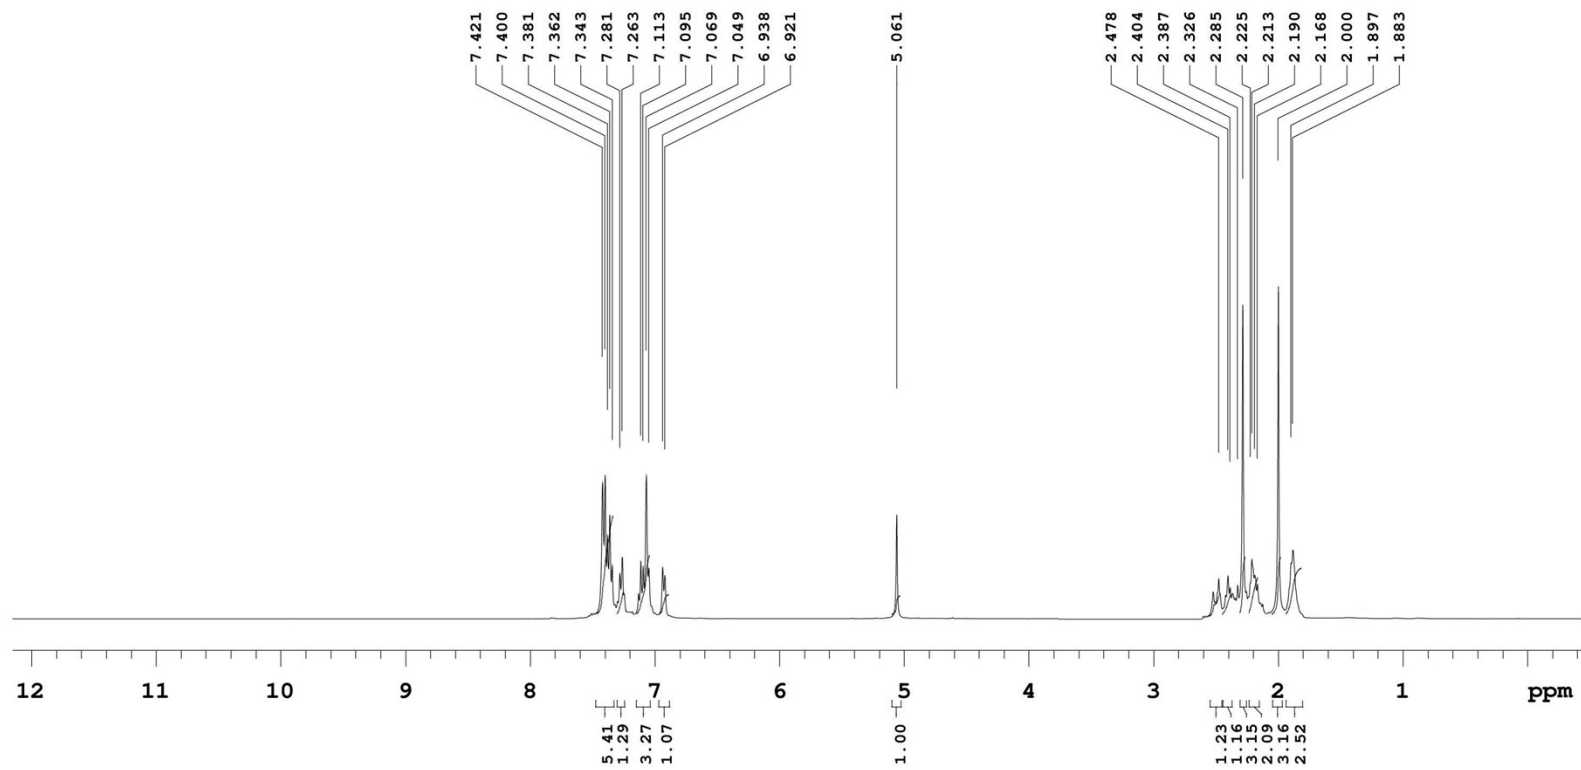

$^{13}\text{C}$  NMR of **5b** in  $\text{CDCl}_3$

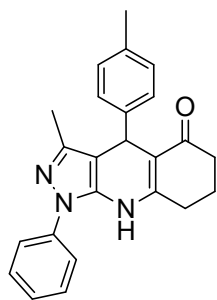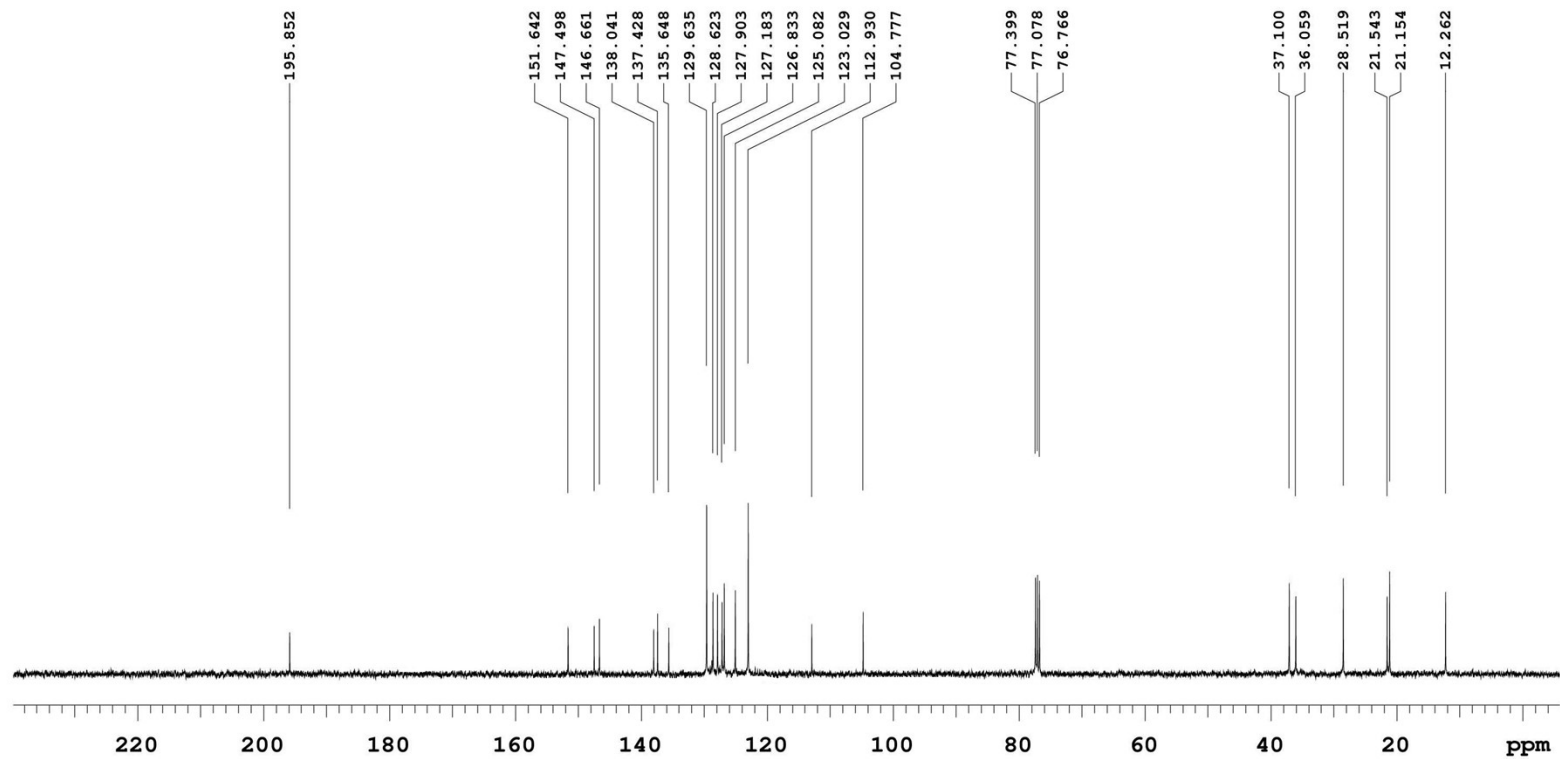

$^1\text{H}$  NMR of **5c** in  $\text{CDCl}_3$

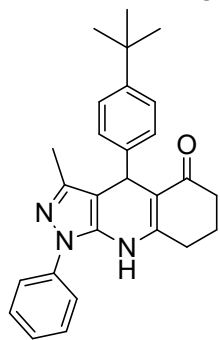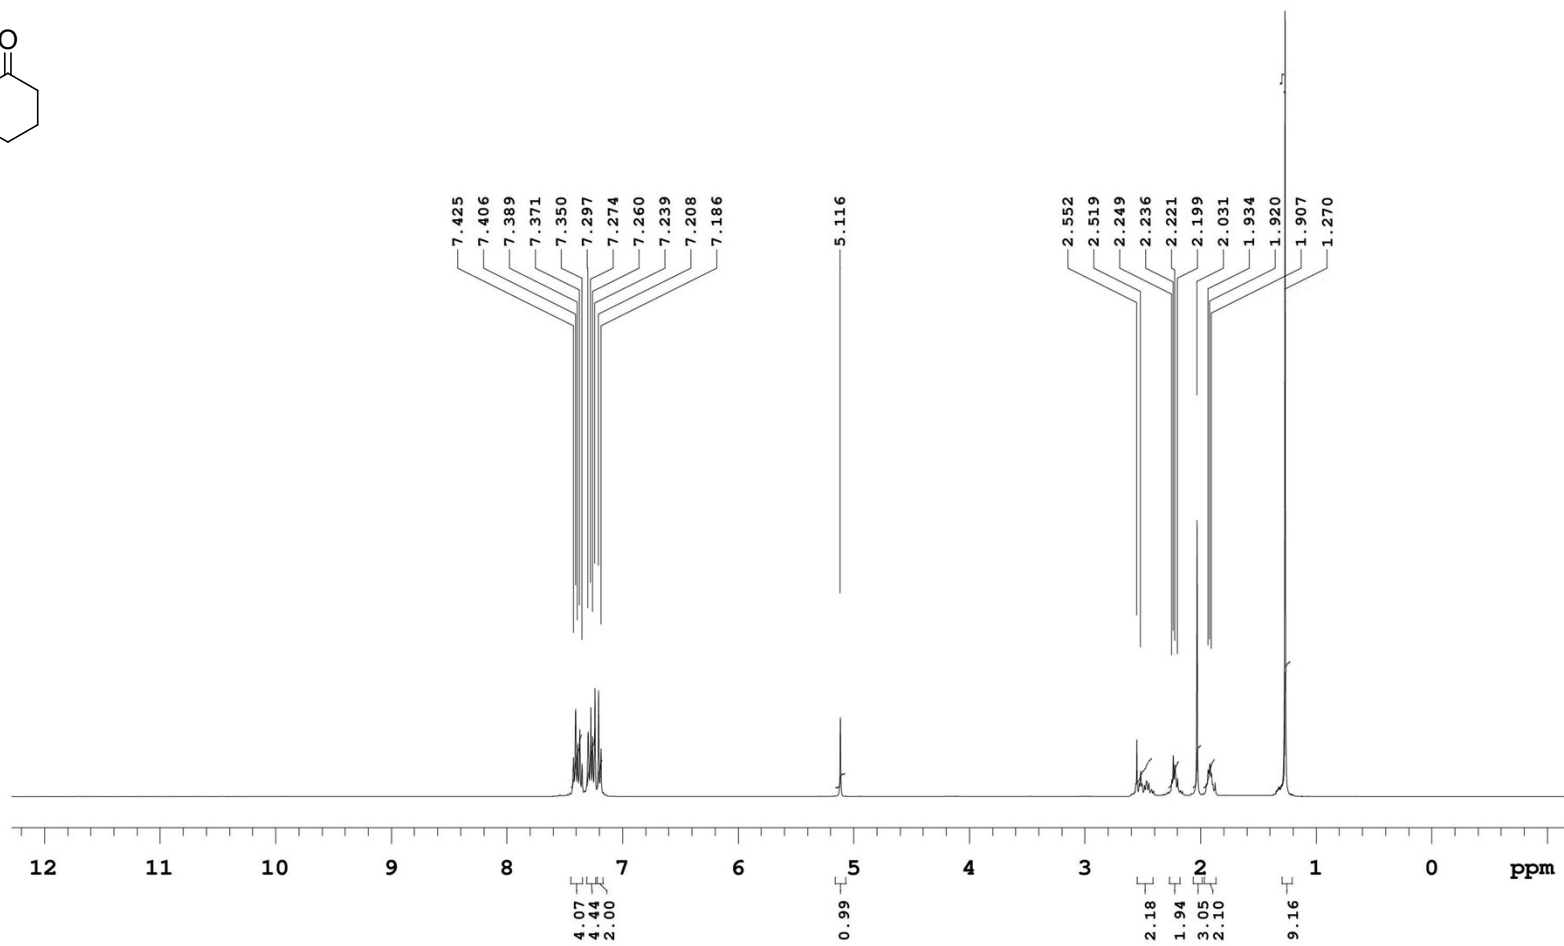

<sup>13</sup>C NMR of **5c** in CDCl<sub>3</sub>

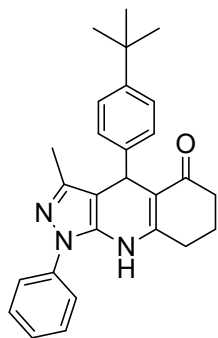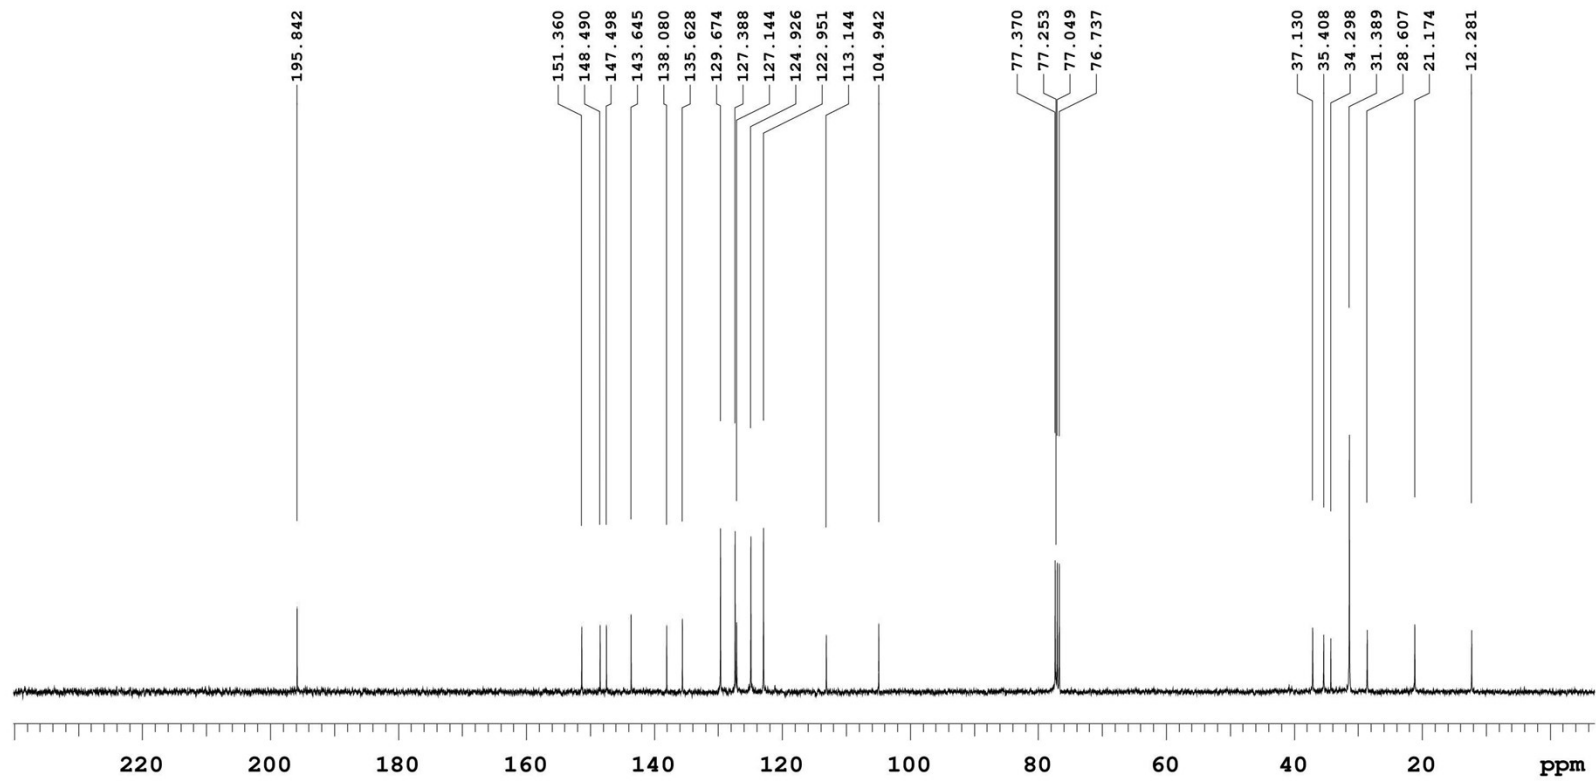

$^1\text{H}$  NMR of **5d** in  $\text{CDCl}_3$

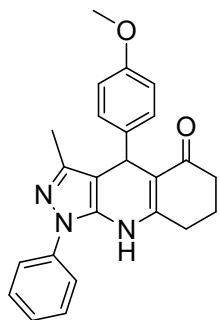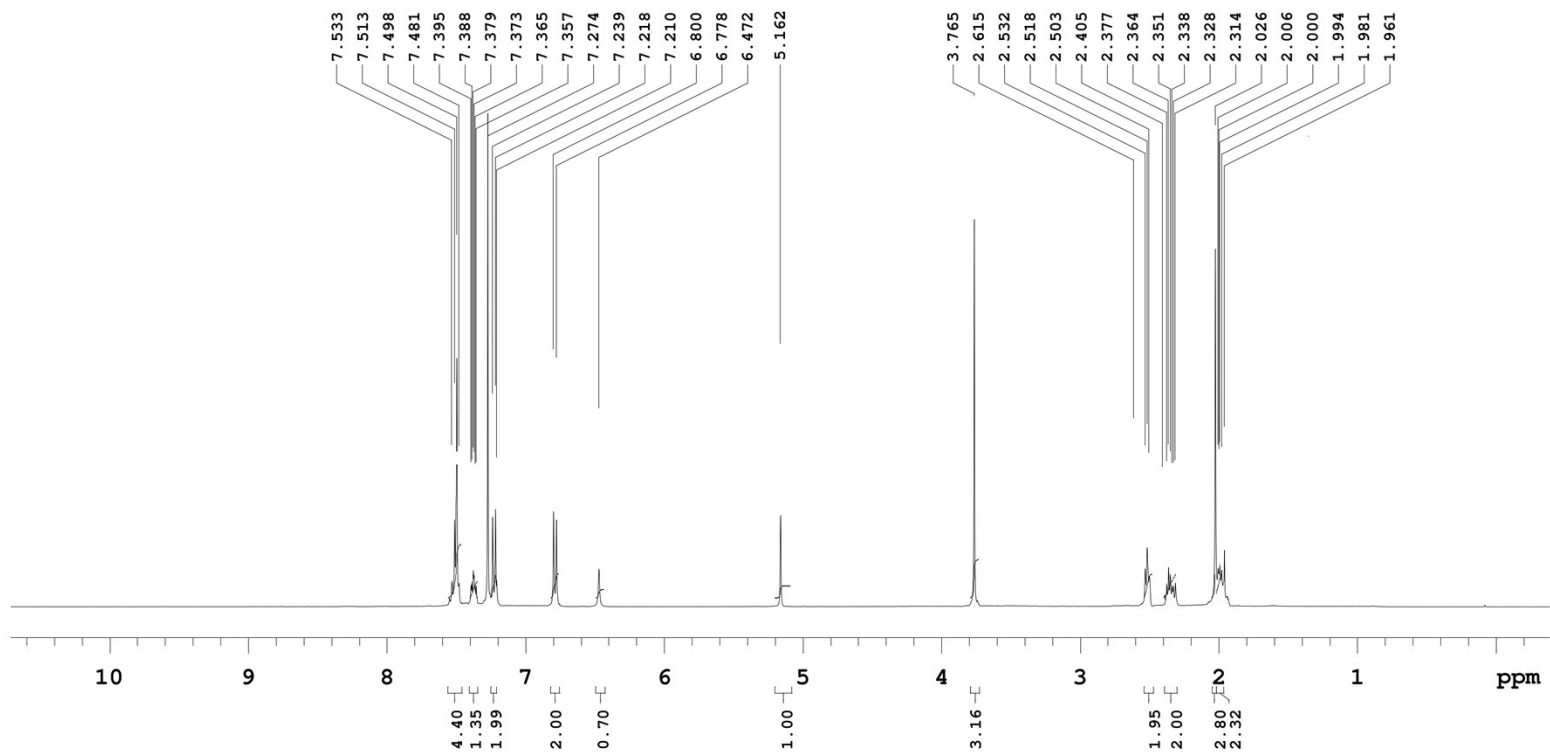

$^{13}\text{C}$  NMR of **5d** in  $\text{CDCl}_3$

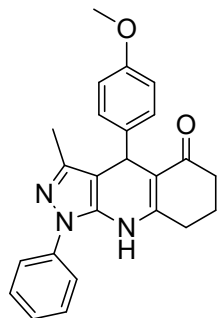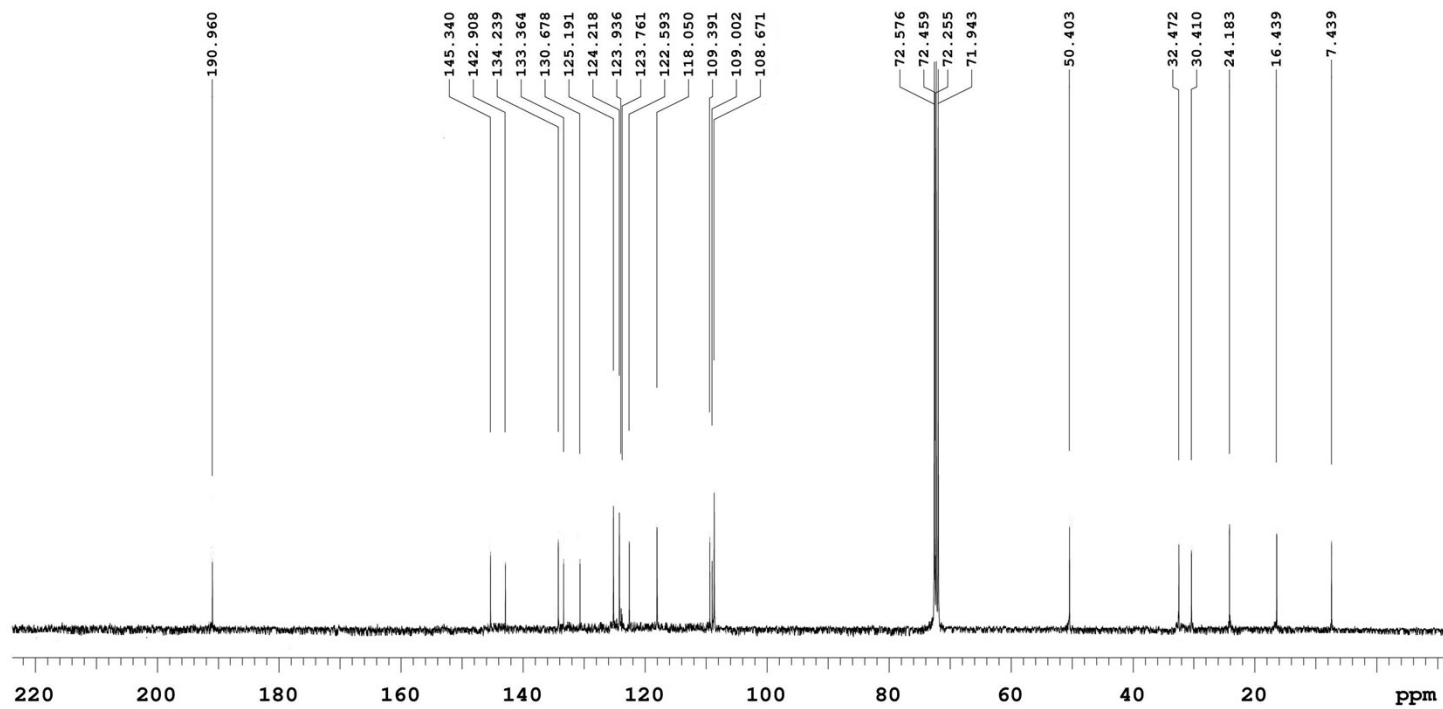



$^1\text{H}$  NMR of **5e** in  $\text{CDCl}_3$

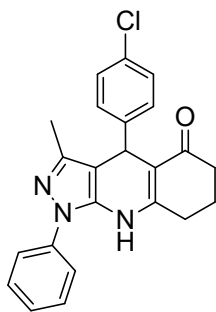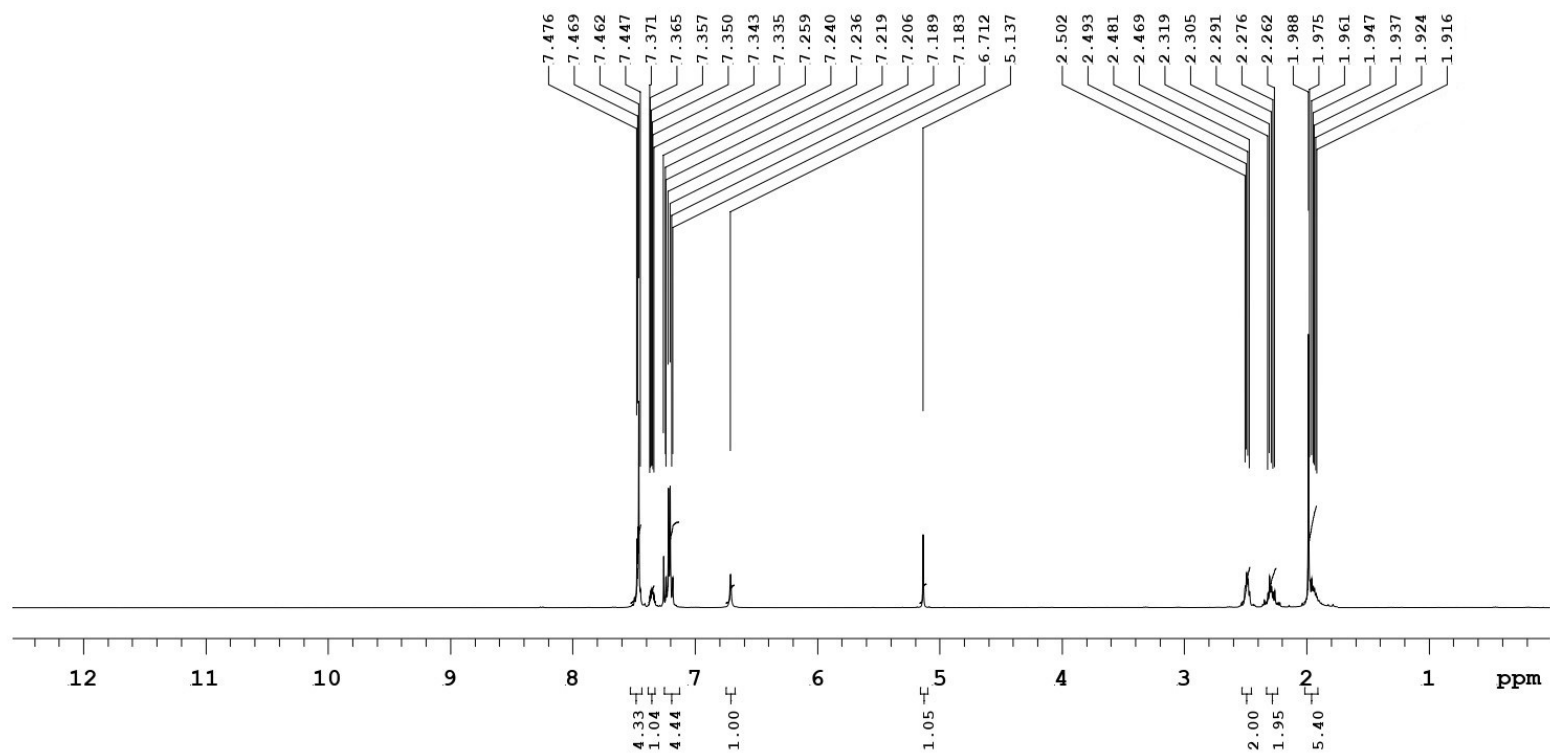

$^{13}\text{C}$  NMR of **5e** in  $\text{CDCl}_3$

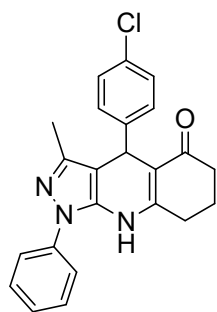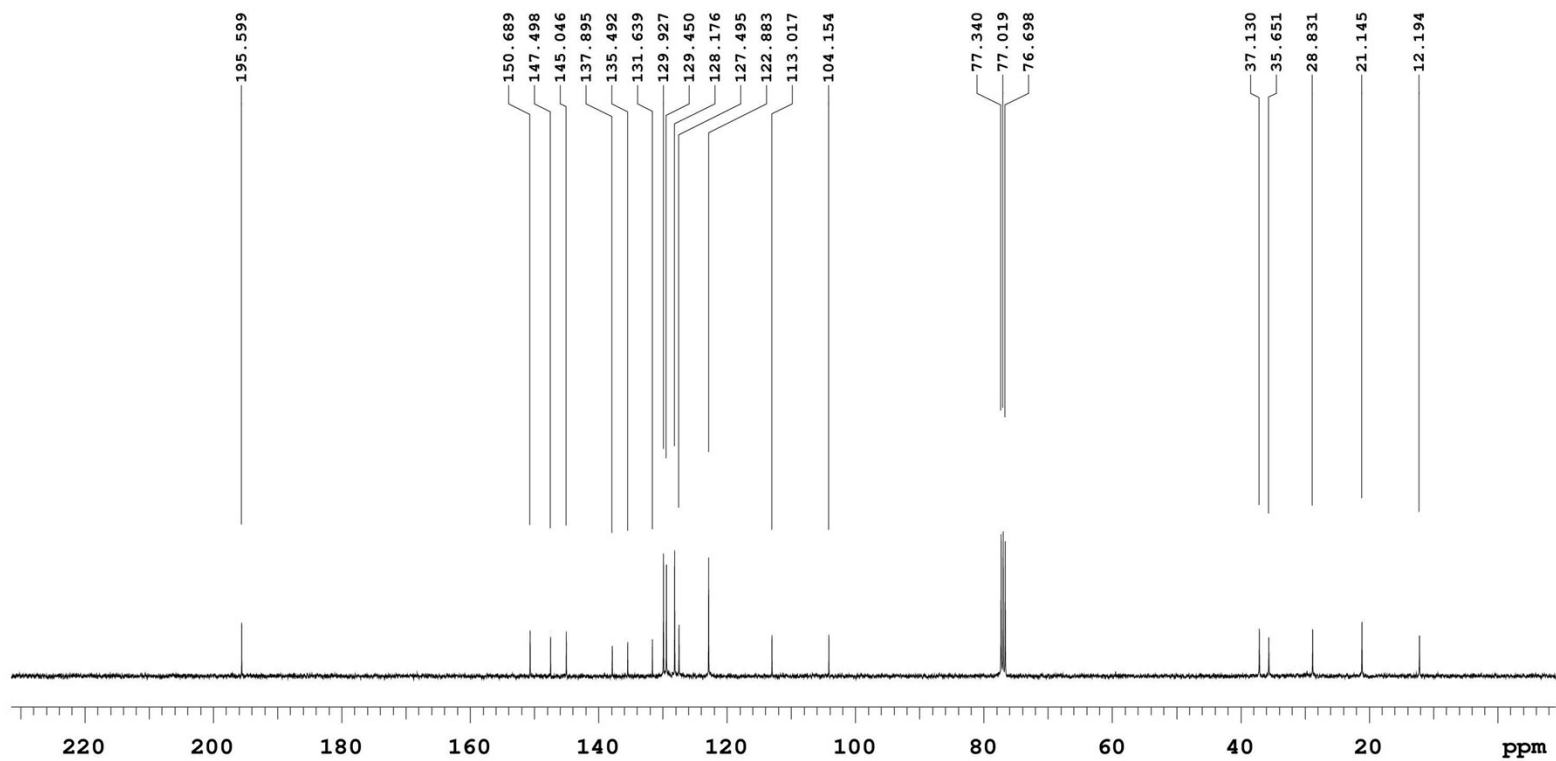

<sup>1</sup>H NMR of **5f** in CDCl<sub>3</sub>

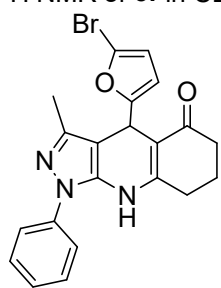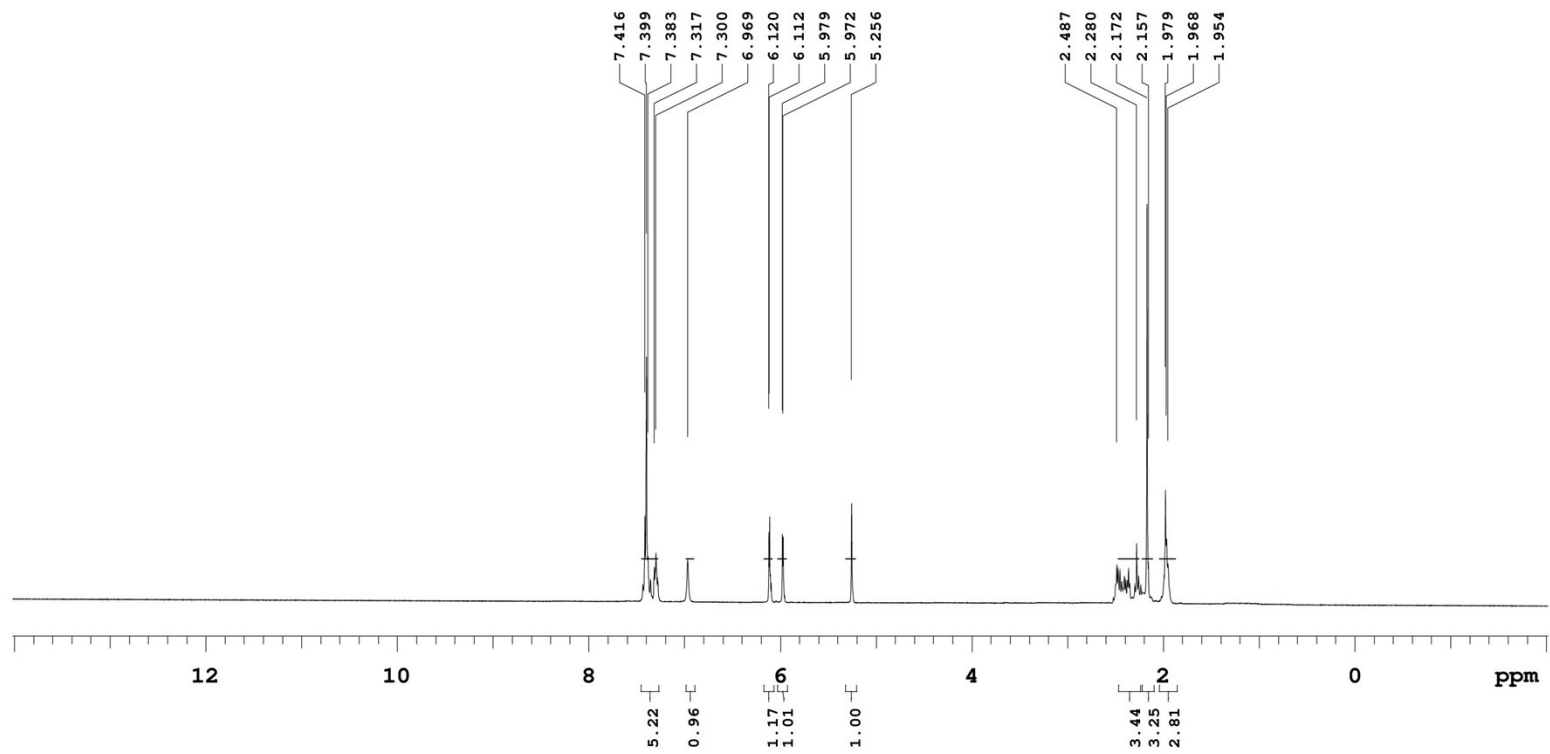

<sup>13</sup>C NMR of **5f** in CDCl<sub>3</sub>

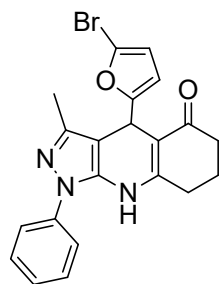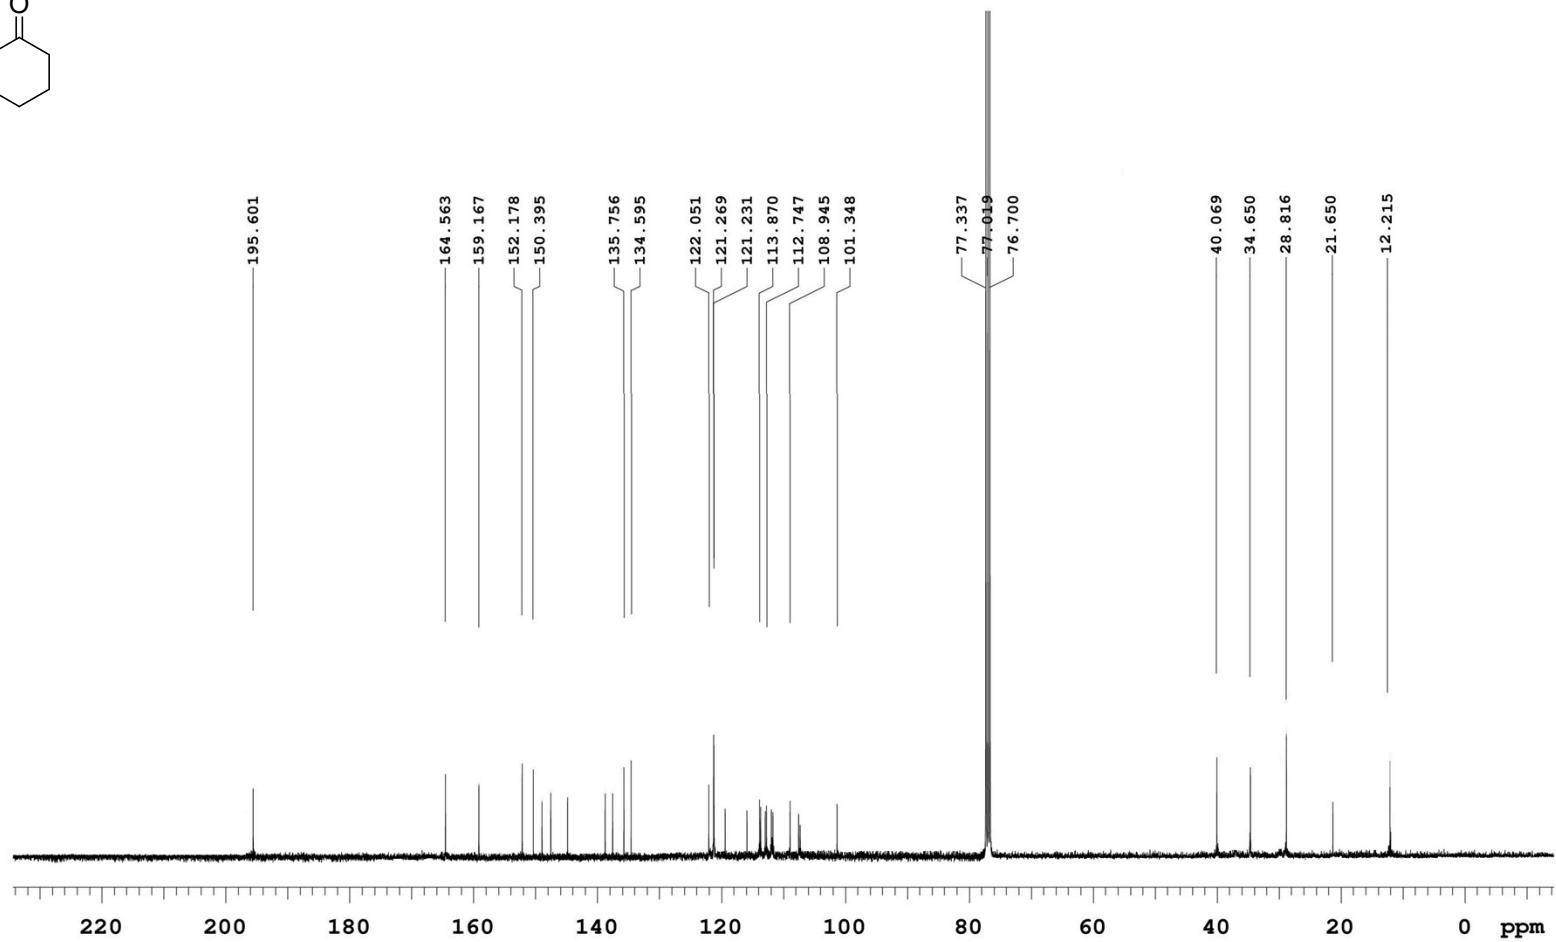

$^1\text{H}$  NMR of **6a** in  $\text{CDCl}_3$

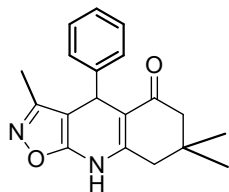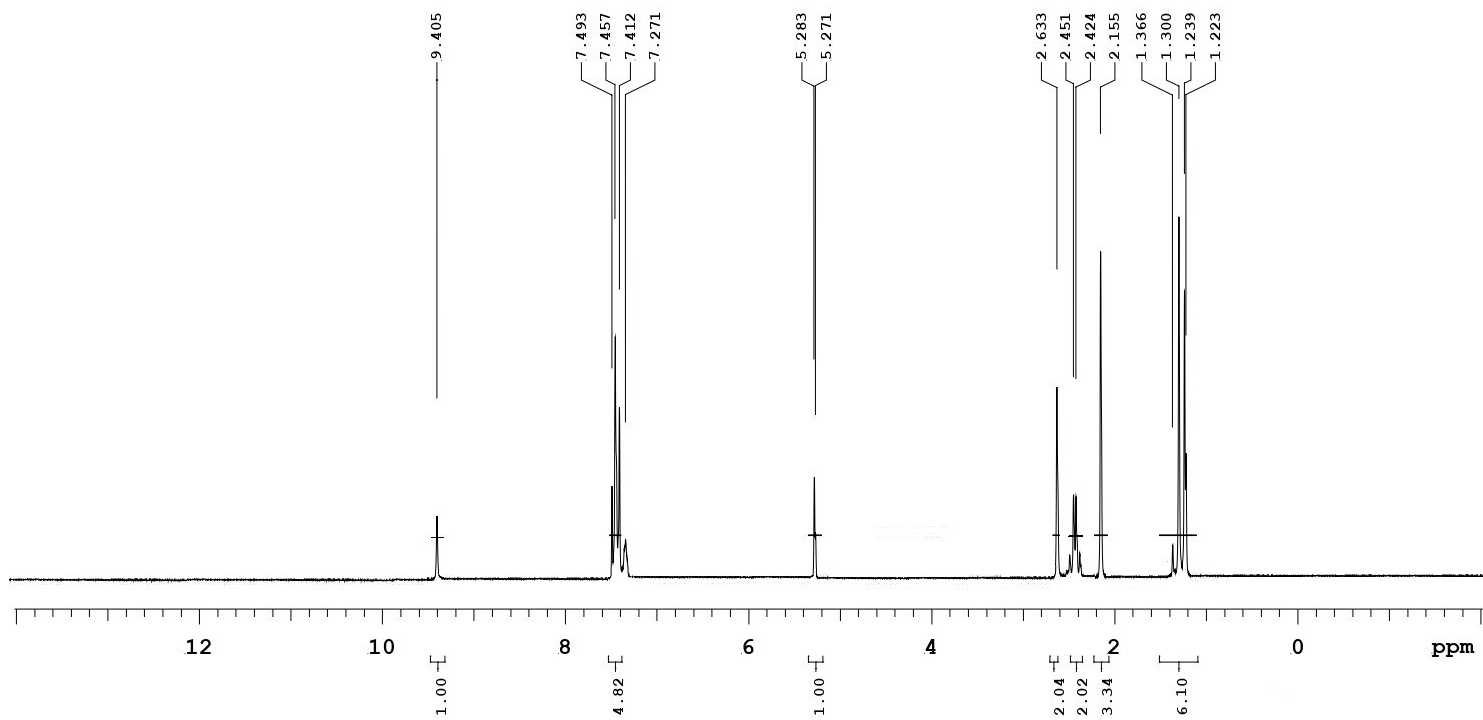

$^{13}\text{C}$  NMR of **6a** in  $\text{CDCl}_3$

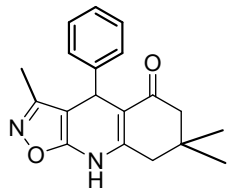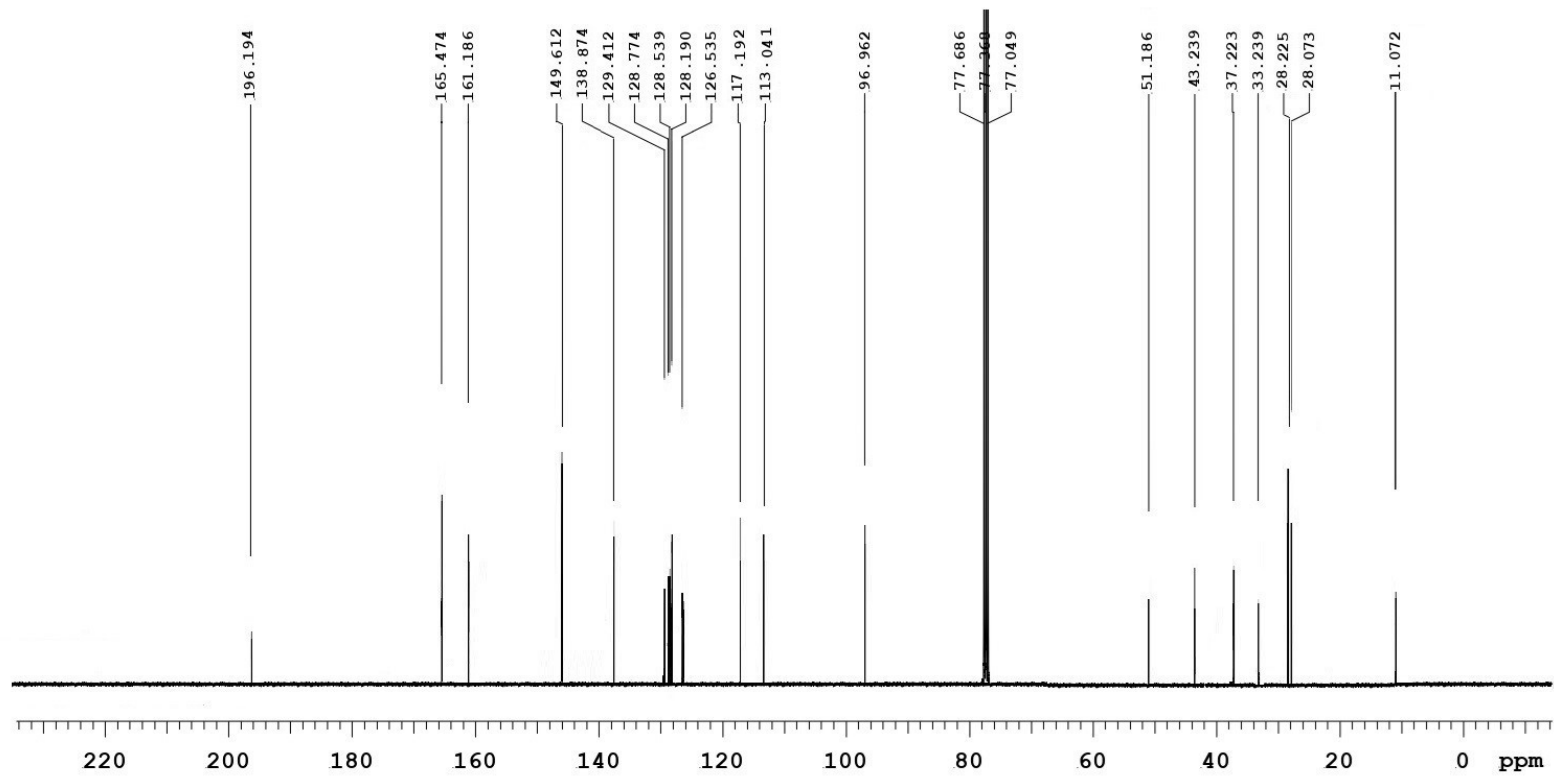

$^1\text{H}$  NMR of **6b** in DMSO-d<sub>6</sub>

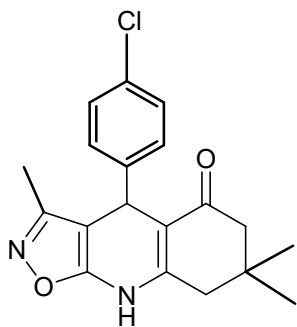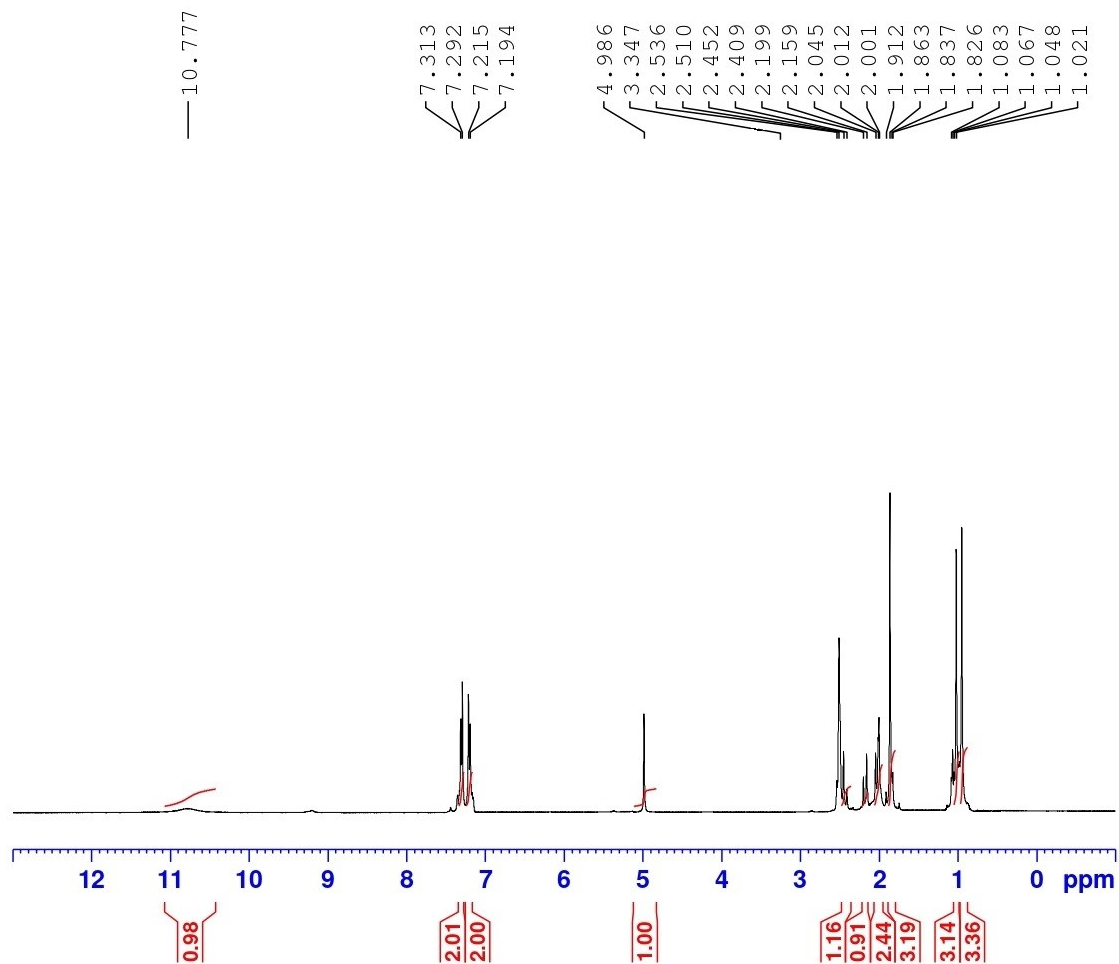

$^{13}\text{C}$  NMR of **6b** in  $\text{CDCl}_3$

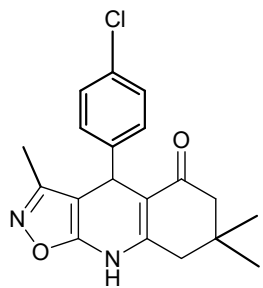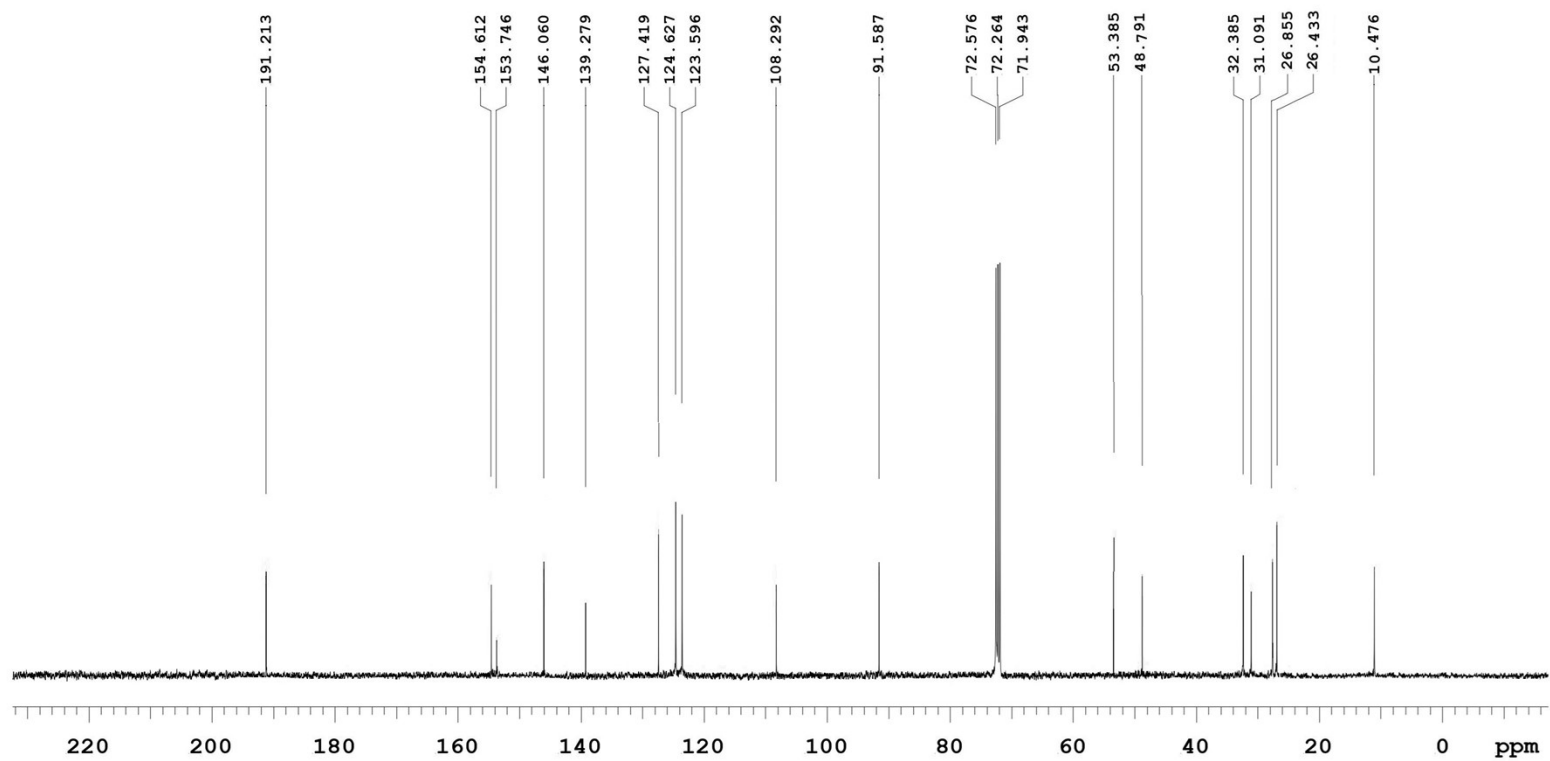



$^1\text{H}$  NMR of **6c** in DMSO- $d_6$

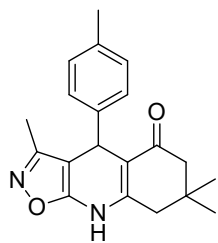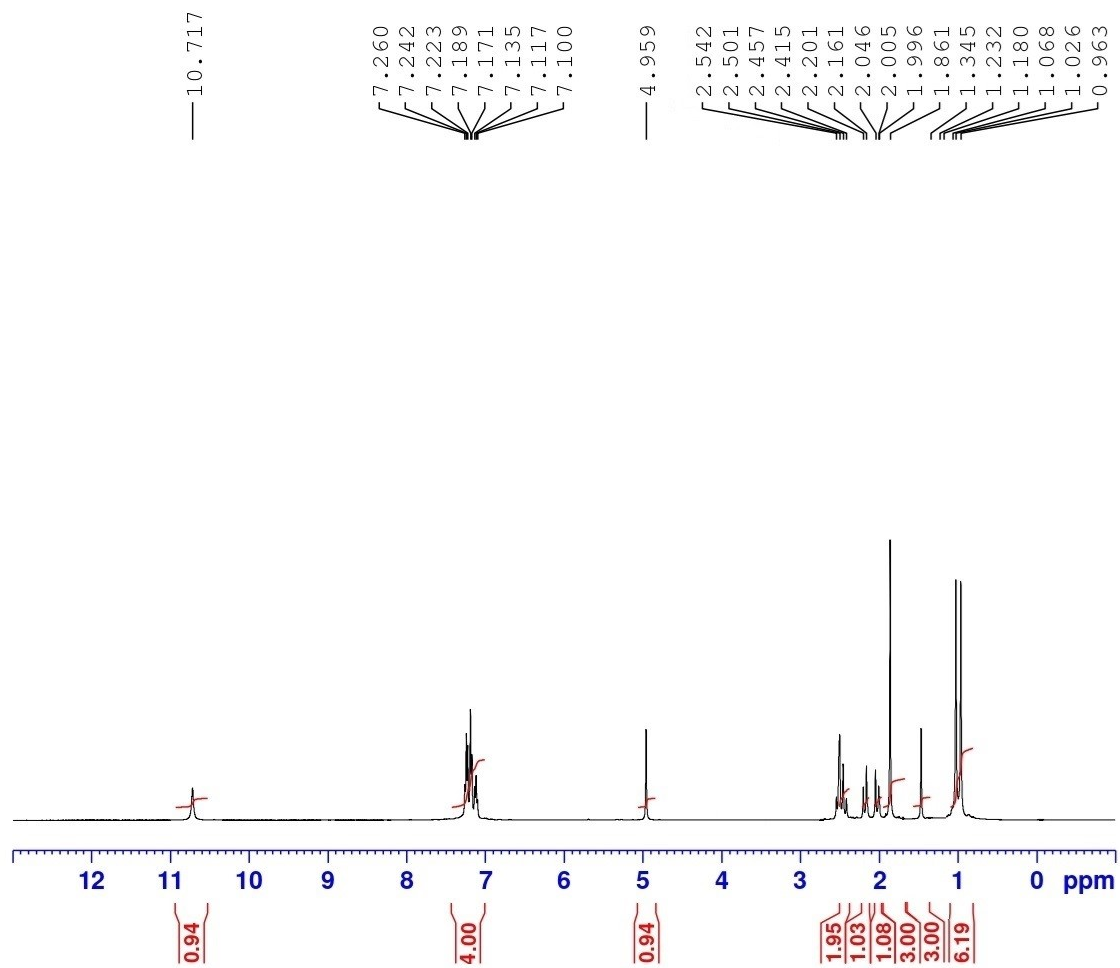

$^{13}\text{C}$  NMR of **6c** in  $\text{CDCl}_3$

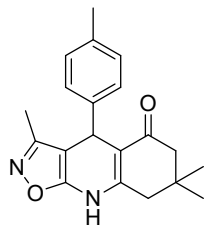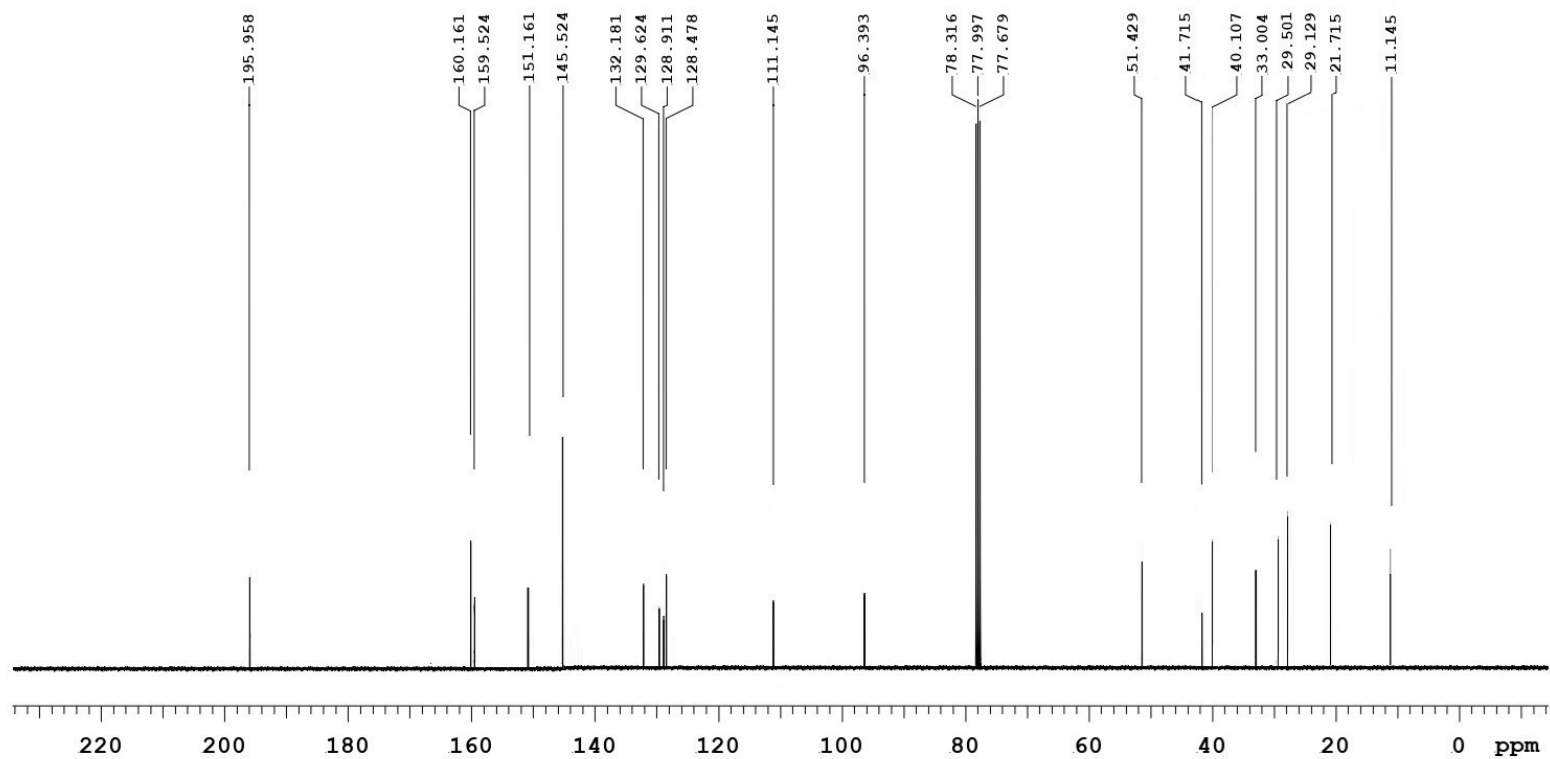

$^1\text{H}$  NMR of **6d** in DMSO- $d_6$

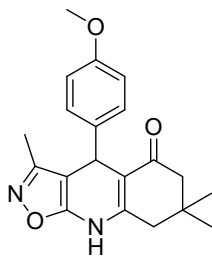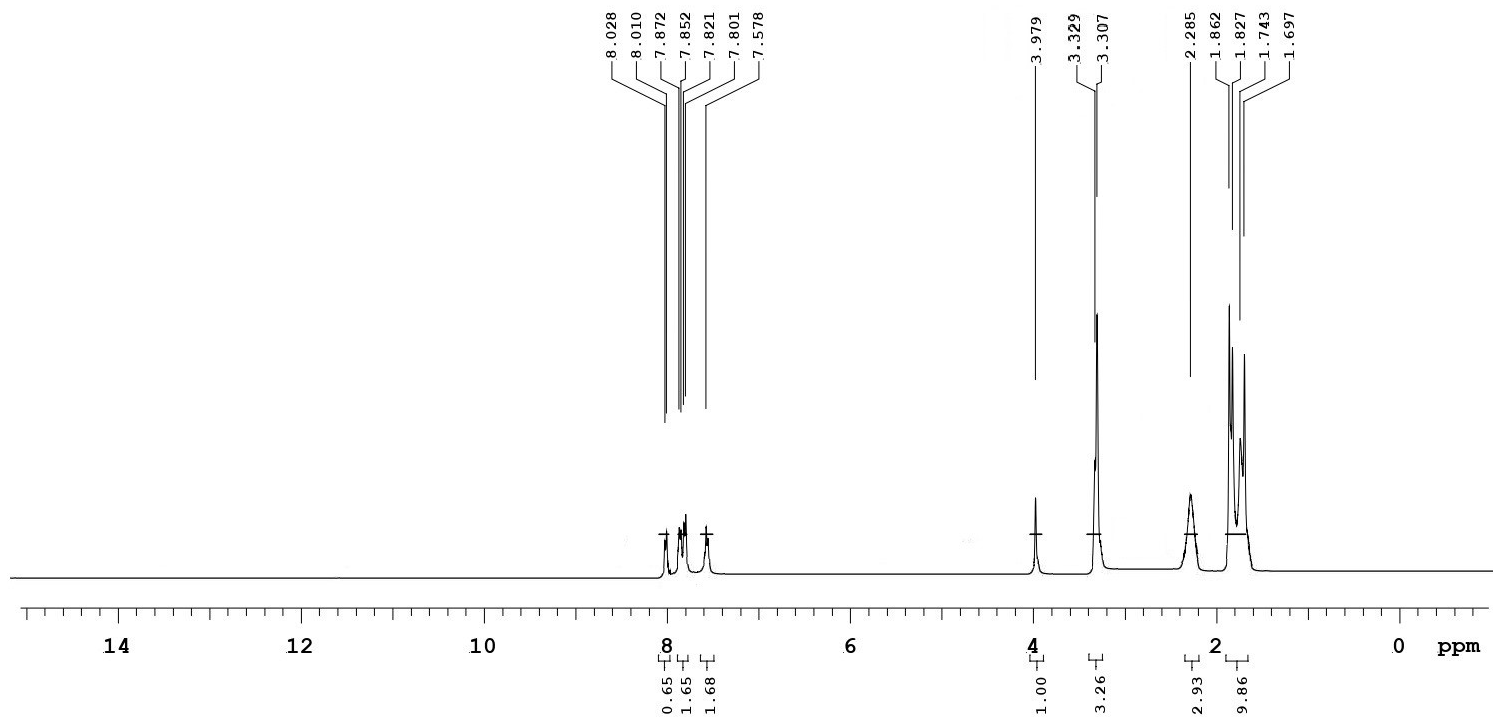

$^{13}\text{C}$  NMR of **6d** in  $\text{CDCl}_3$

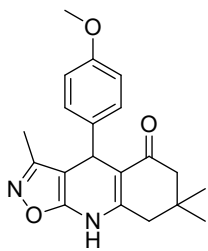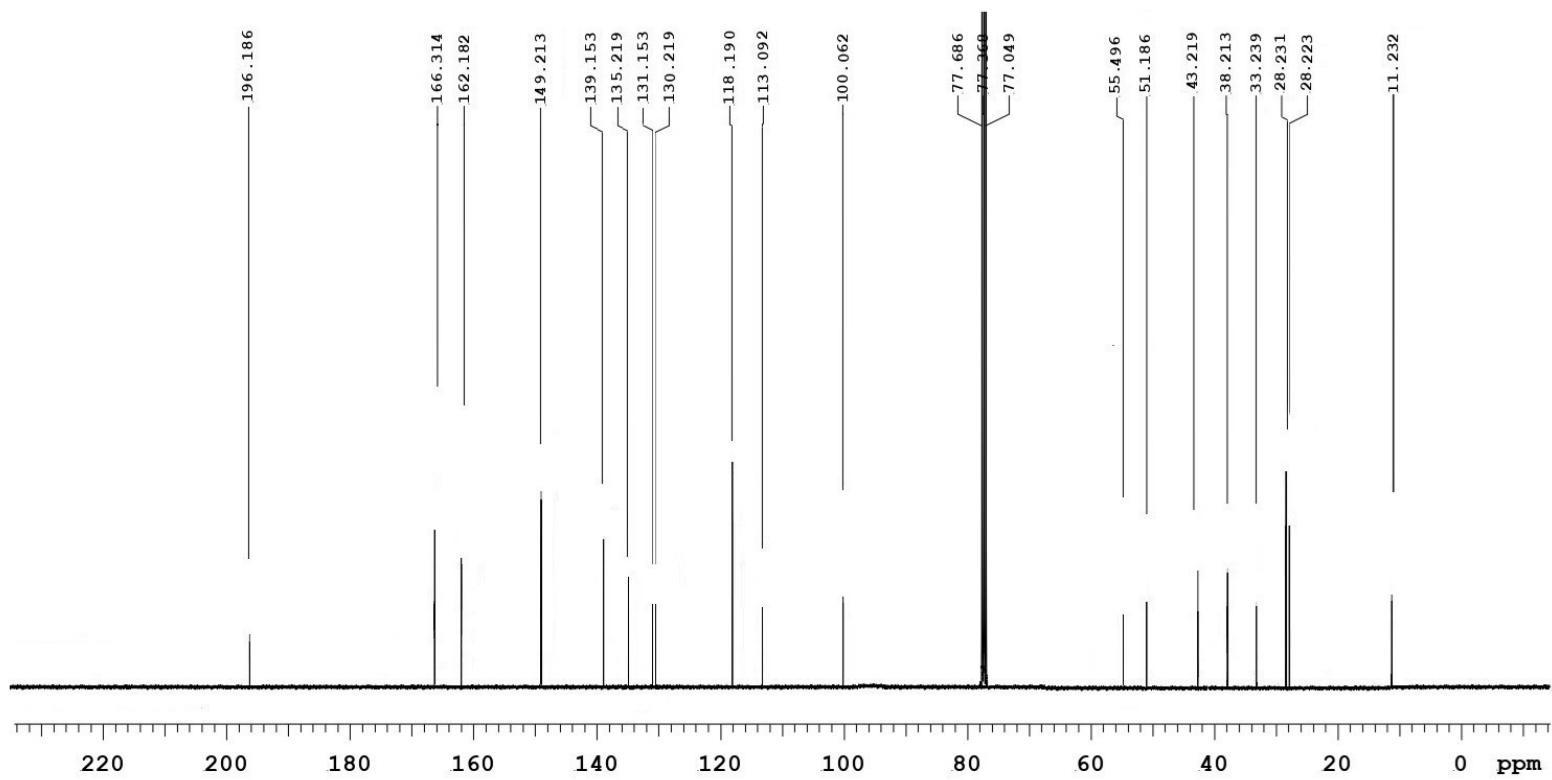

$^1\text{H}$  NMR of **6e** in DMSO- $d_6$

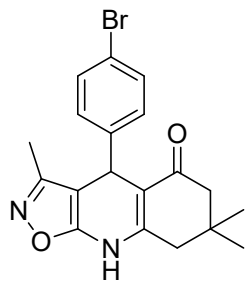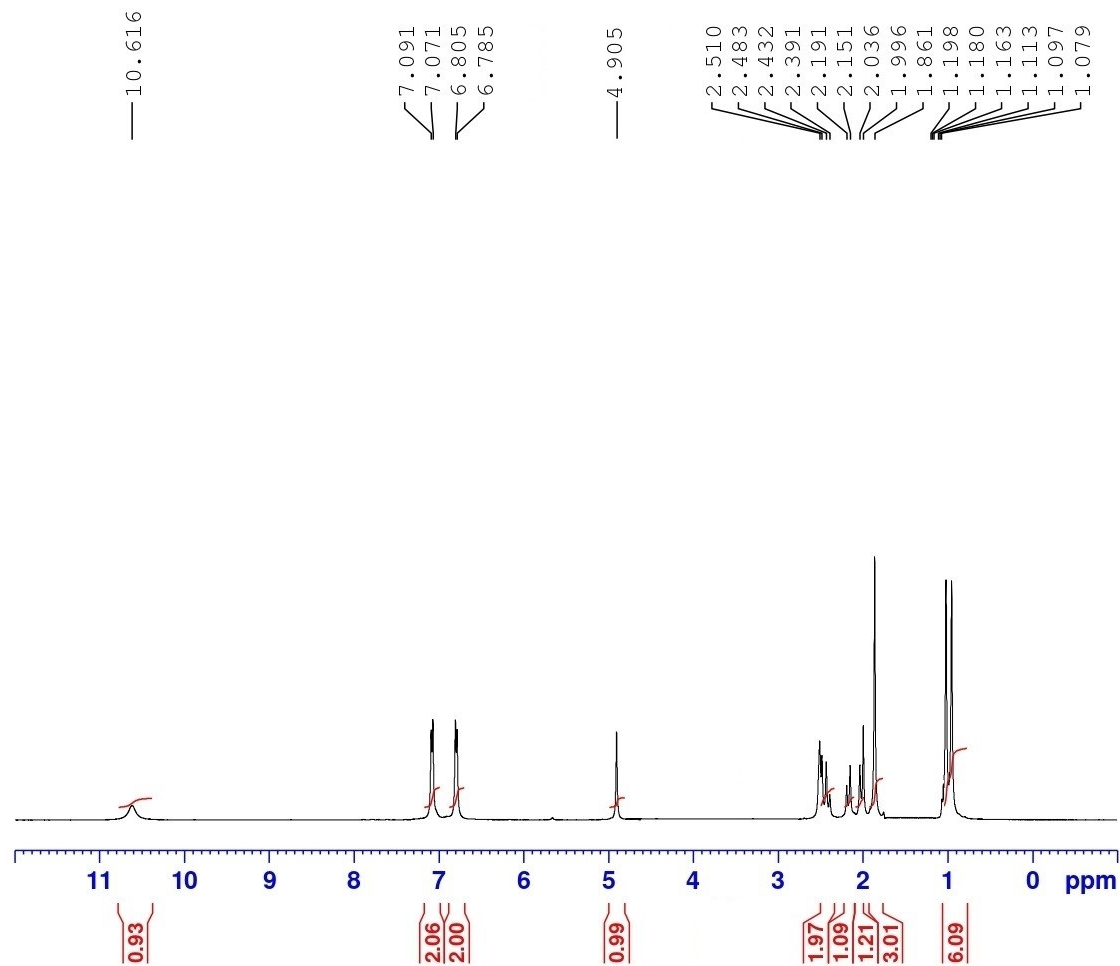

$^{13}\text{C}$  NMR of **6e** in DMSO- $d_6$

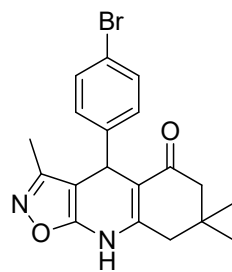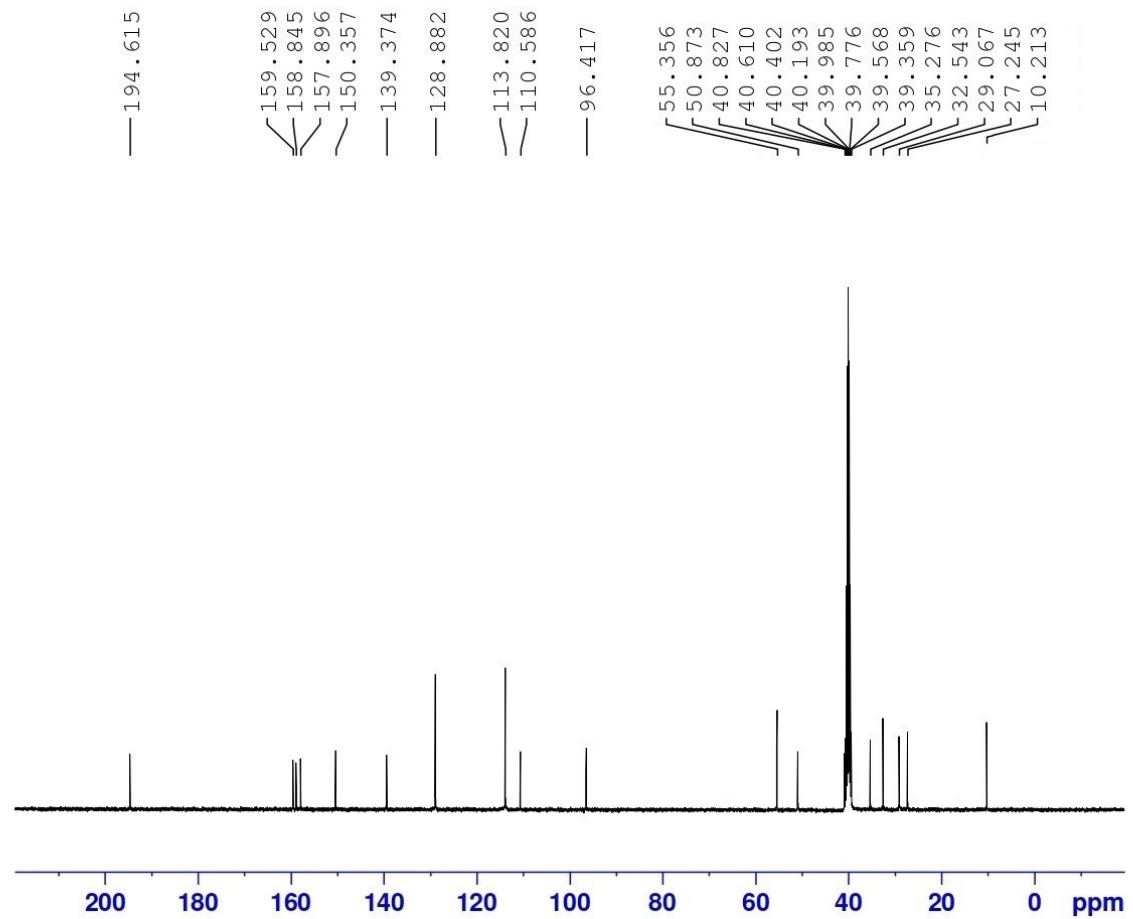

$^1\text{H}$  NMR of **6f** in  $\text{CDCl}_3$

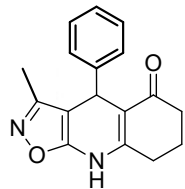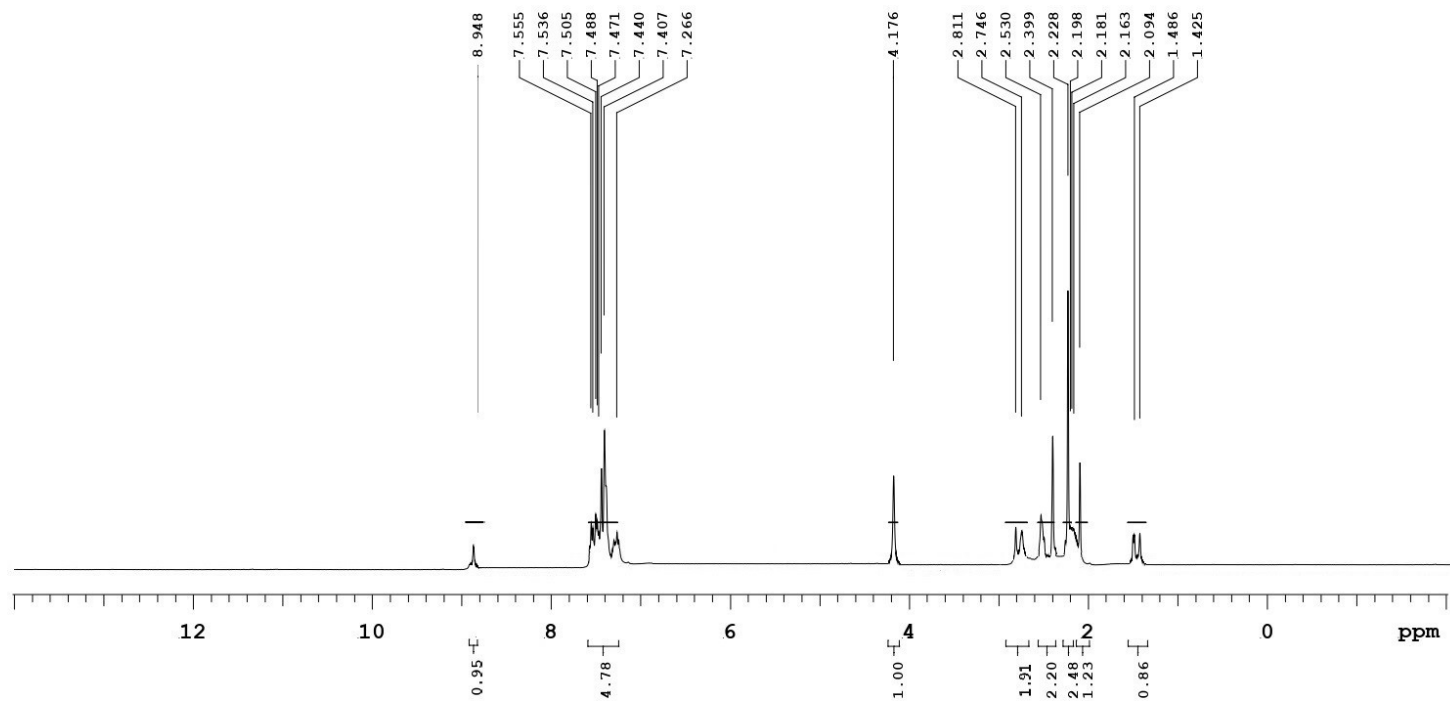

$^{13}\text{C}$  NMR of **6f** in  $\text{CDCl}_3$

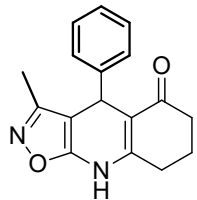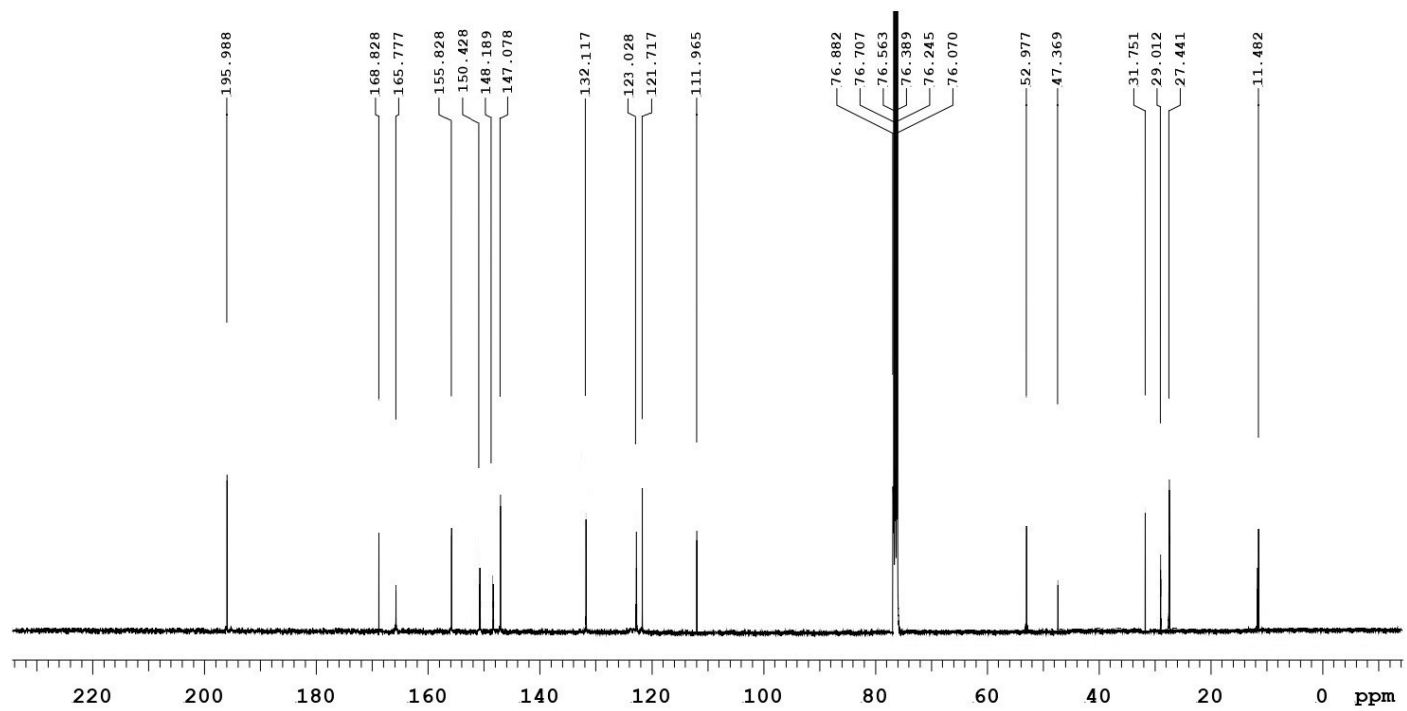



$^1\text{H}$  NMR of **6g** in  $\text{CDCl}_3$

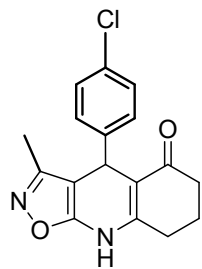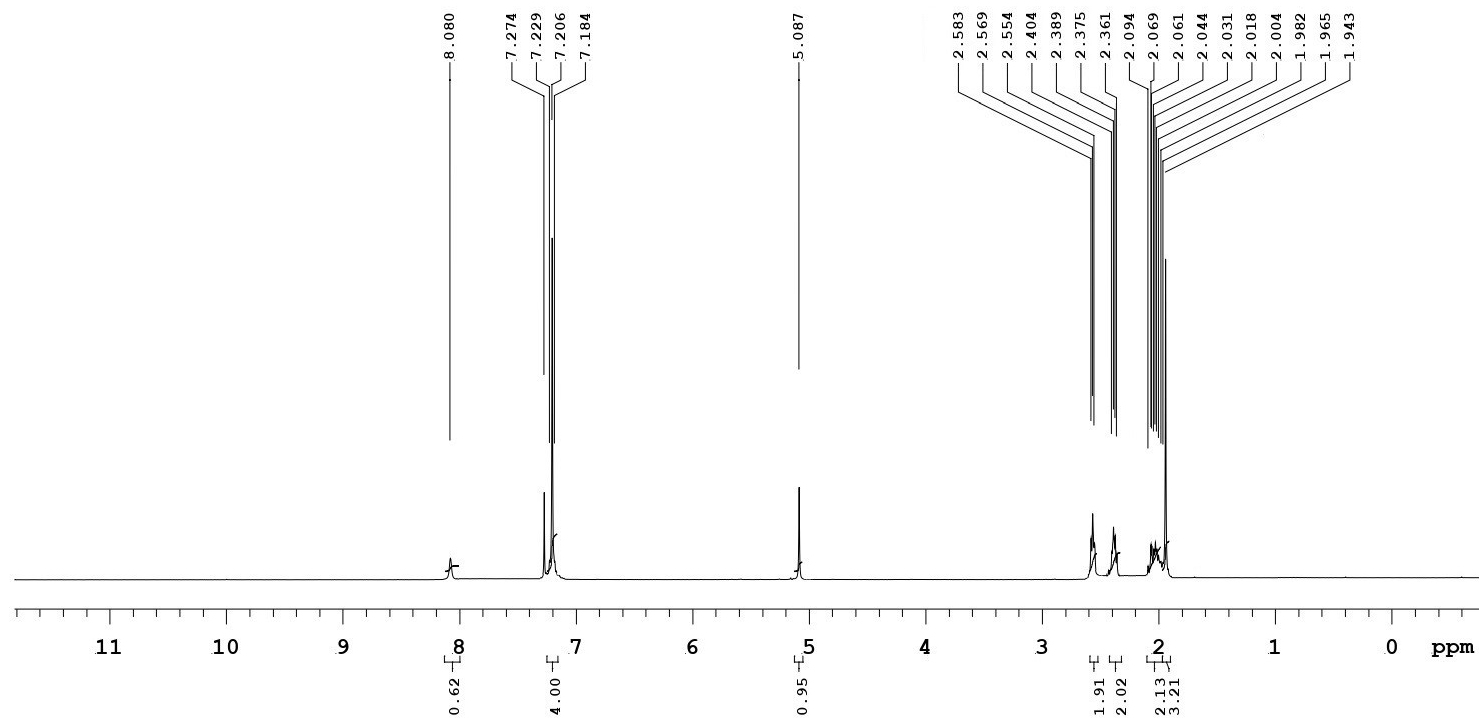

$^{13}\text{C}$  NMR of **6g** in  $\text{CDCl}_3$

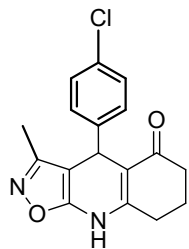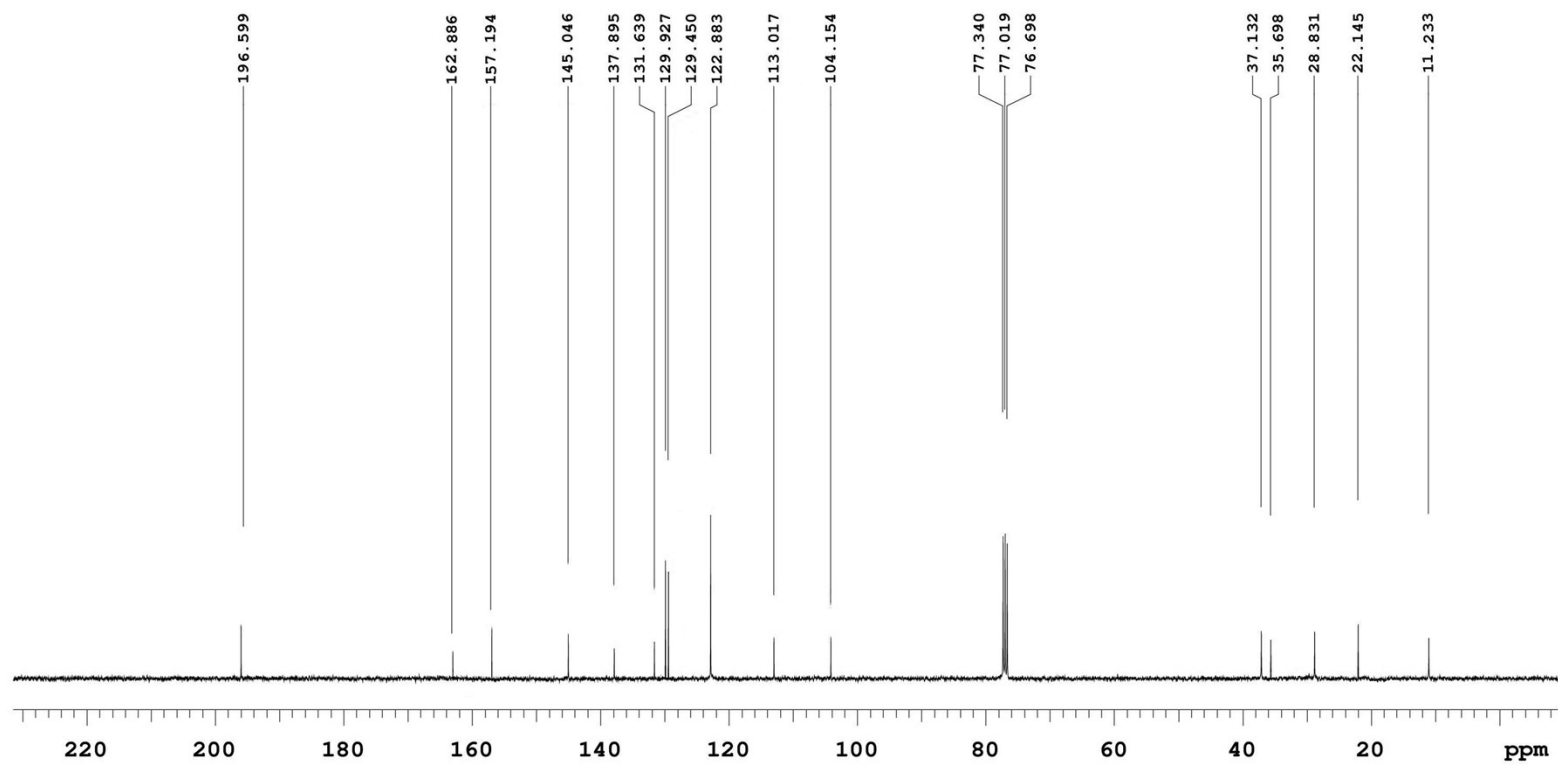

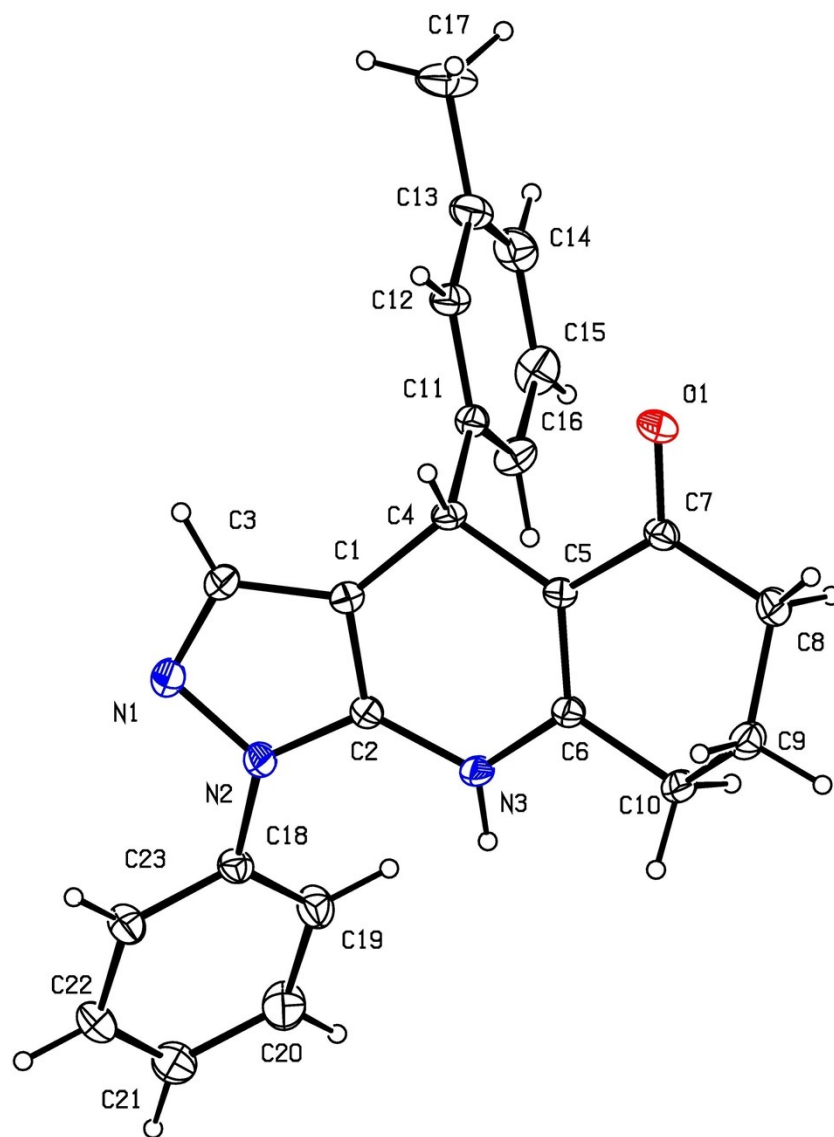

3b
